# Supplementary material for: Naphthyridine–2NO, a new C2-symmetric rigid tetradentate bimetallic ligand and its application in asymmetric Friedel–Crafts alkylation
Source: Royal Society of Chemistry journal article supplement (doi:10.1039/d4qo00248b), 2024-01-01

# Naphthyridine-2NO, a new $C_2$ -symmetric rigid tetradentate bimetallic ligand and its application in asymmetric Friedel- Crafts alkylation

Pan Hu<sup>a,d</sup>, Ke-Lan Xu<sup>a,d</sup>, Xi-Rui Wang<sup>a,d</sup>, Zi-Yue Chen<sup>a</sup>, Wen-Hui Zhang<sup>b</sup>, Ying Zhou<sup>b</sup>, Wen-Jing  
Zhang<sup>c</sup>, and Xiong-Li Liu<sup>a,\*</sup>

<sup>a</sup> National & Local Joint Engineering Research Center for the Exploitation of Homology Resources of Southwest Medicine and Food, Guizhou University, Guiyang 550025, Guizhou, China.

<sup>b</sup> College of Pharmaceutical Sciences, Guizhou University of Traditional Chinese Medicine, Guiyang, 550025, Guizhou, China.

<sup>c</sup> Green Catalysis Center, and College of Chemistry, Zhengzhou University, Zhengzhou 450001, Henan, China.

<sup>d</sup> These three authors contributed equally to this work.

\*E-mail address: xlliu1@gzu.edu.cn

## Table of Contents

|                                                                                                                     |     |
|---------------------------------------------------------------------------------------------------------------------|-----|
| Table of contents.....                                                                                              | S1  |
| 1. General information.....                                                                                         | S2  |
| 2. General procedure for preparation of chiral Nar-2NO ligands <b>L</b> .....                                       | S2  |
| 3. Characterization data of ligands <b>L</b> .....                                                                  | S2  |
| 4. The gram scale synthesis of the Nar-2NO ligand <b>L1a</b> .....                                                  | S8  |
| 5. Catalytic asymmetric synthesis of compounds <b>6</b> .....                                                       | S9  |
| 6. Characterization data of compounds <b>6</b> .....                                                                | S9  |
| 7. References.....                                                                                                  | S16 |
| 8. X-ray crystal data for compounds <b>6a</b> .....                                                                 | S17 |
| 9. The copies of <sup>1</sup> H NMR, <sup>13</sup> C NMR and HPLC spectra for compounds <b>L</b> and <b>6</b> ..... | S18 |

## 1. General information

Reactions were monitored by thin layer chromatography using UV light to visualize the course of reaction. Purification of reaction products was carried out by flash chromatography.  $^1\text{H}$  and  $^{13}\text{C}$ NMR spectra were obtained using a Bruker DPX-400 spectrometer.  $^1\text{H}$  NMR chemical shifts are reported in ppm ( $\delta$ ) relative to tetramethylsilane (TMS) with the solvent resonance employed as the internal standard. Data are reported as follows: chemical shift, multiplicity (s = singlet, d = doublet, t = triplet, m = multiplet), coupling constants (Hz) and integration.  $^{13}\text{C}$  NMR chemical shifts are reported in ppm ( $\delta$ ) from tetramethylsilane (TMS) with the solvent resonance as the internal standard. Melting points were measured on an electrothermal digital melting point apparatus.

## 2. General procedure for preparation of chiral Nar-2NO ligands L1

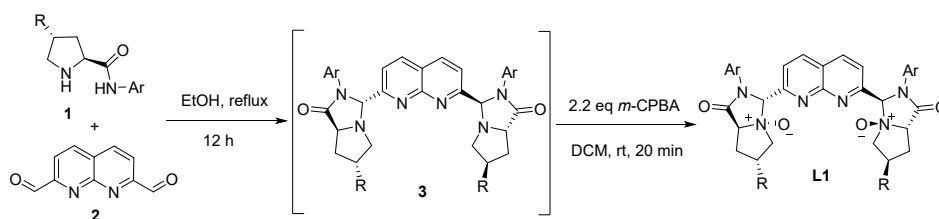

**General procedure A**—In a sealed tube equipped with a magnetic stirring bar, naphthyridine-dicarbaldehyde **2** (1.0 mmol) and optically pure prolinamide **1** (2.4 mmol, 2.4 equiv) were added. Then, ethanol (6.0 mL) was added and the reaction was heated with stirring at reflux for 12 h. After completion of the reaction, as indicated by TLC, the aftertreatment residue was purified by flash column chromatography to give the intermediate **3**.

In a sealed tube equipped with a magnetic stirring bar, to the intermediate **3** was added 3.0 mL of DCM and *m*-CPBA (2.2 eq). The reaction mixture was stirred at 0 °C for 20 min. After completion of the reaction, as indicated by TLC, the aftertreatment residue was purified by flash column chromatography to furnish the Nar-2NO ligand **L1**.

## 3. Characterization data of ligands L

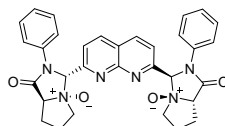

**L1a:** White solid, M.p. 247.1-247.9 °C,  $[\alpha]_D^{20} = +55.7$  (*c* 0.52, CHCl<sub>3</sub>); overall yield 51%, >20:1 dr; <sup>1</sup>H NMR (CD<sub>3</sub>OD, 400 MHz)  $\delta$ : 2.20-2.27 (m, 2H), 2.44-2.58 (m, 6H), 3.92-3.96 (m, 2H), 4.13-4.20 (m, 2H), 4.80-4.82 (m, 2H), 7.02 (s, 2H), 7.14-7.18 (m, 2H), 7.26-7.30 (m, 4H), 7.47-7.50 (m, 4H), 7.95 (d, *J* = 8.4 Hz, 2H), 8.54 (d, *J* = 8.4 Hz, 2H); <sup>13</sup>C NMR (CD<sub>3</sub>OD, 100 MHz)  $\delta$ : 22.3, 24.1, 70.8, 76.8, 87.3, 122.4, 124.1, 125.6, 126.6, 129.0, 135.6, 138.5, 154.4, 156.0, 168.8; HRMS (ESI-TOF) *m/z*: Calcd. for C<sub>32</sub>H<sub>30</sub>N<sub>6</sub>NaO<sub>4</sub> [M+Na]<sup>+</sup>: 585.2221; Found: 585.2228.

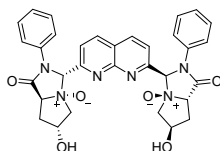

**L1b:** White solid, M.p. 248.2-249.0 °C,  $[\alpha]_D^{20} = -33.3$  (*c* 0.49, CHCl<sub>3</sub>); overall yield 45%, >20:1 dr; <sup>1</sup>H NMR (CD<sub>3</sub>OD, 400 MHz)  $\delta$ : 2.57-2.63 (m, 2H), 2.83-2.90 (m, 2H), 3.95 (d, *J* = 12.4 Hz, 2H), 4.41-4.45 (m, 2H), 4.66 (s, 2H), 5.02-5.05 (m, 2H), 7.02 (s, 2H), 7.14-7.17 (m, 2H), 7.26-7.30 (m, 4H), 7.46-7.48 (m, 4H), 7.94 (d, *J* = 8.4 Hz, 2H), 8.52 (d, *J* = 8.4 Hz, 2H); <sup>13</sup>C NMR (CD<sub>3</sub>OD, 100 MHz)  $\delta$ : 35.1, 69.8, 76.5, 76.8, 87.9, 122.6, 124.2, 125.7, 126.7, 129.0, 135.4, 138.5, 154.3, 155.6, 168.0; HRMS (ESI-TOF) *m/z*: Calcd. for C<sub>32</sub>H<sub>30</sub>N<sub>6</sub>NaO<sub>6</sub> [M+Na]<sup>+</sup>: 617.2119; Found: 617.2118.

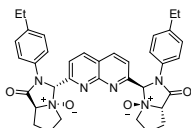

**L1c:** White solid, M.p. 231.3-232.2 °C,  $[\alpha]_D^{20} = +164.7$  (*c* 0.50, CHCl<sub>3</sub>); overall yield 46%, 19:1 dr; <sup>1</sup>H NMR (CD<sub>3</sub>OD, 400 MHz)  $\delta$ : 1.08-1.12 (m, 6H), 2.22-2.27 (m, 2H), 2.45-2.59 (m, 10H), 3.93-3.97 (m, 2H), 4.13-4.20 (m, 2H), 4.80-4.83 (m, 2H), 6.99 (s, 2H), 7.11 (d, *J* = 8.8 Hz, 4H), 7.39 (d, *J* = 8.4 Hz, 4H), 7.94 (d, *J* = 8.4 Hz, 2H), 8.53 (d, *J* = 8.0 Hz, 2H); <sup>13</sup>C NMR (CD<sub>3</sub>OD, 100 MHz)  $\delta$ : 14.6, 22.3, 24.1, 27.9, 70.8, 76.9, 87.6, 122.7, 124.1, 125.6, 128.3, 133.1, 138.4, 143.2, 154.4, 156.0, 168.7; HRMS (ESI-TOF) *m/z*: Calcd. for C<sub>36</sub>H<sub>38</sub>N<sub>6</sub>NaO<sub>4</sub> [M+Na]<sup>+</sup>: 641.2834; Found: 641.2826.

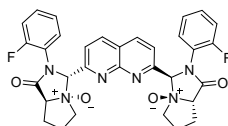

**L1d:** White solid, M.p. 246.7-247.1 °C,  $[\alpha]_D^{20} = -309.7$  (*c* 0.58, CHCl<sub>3</sub>); overall yield 41%, >20:1 dr; <sup>1</sup>H NMR (CD<sub>3</sub>OD, 400 MHz)  $\delta$ : 2.30-2.34 (m, 2H), 2.46-2.64 (m, 6H), 4.01-4.05 (m, 2H), 4.25-4.34 (m, 2H), 4.82-4.84 (m, 2H), 6.85 (s, 2H), 7.06-7.10 (m, 2H), 7.22-7.27 (m, 2H), 7.32-7.40 (m, 4H), 7.90 (d, *J* = 8.4 Hz, 2H), 8.52 (d, *J* = 8.4 Hz, 2H); <sup>13</sup>C NMR (CD<sub>3</sub>OD, 100 MHz)  $\delta$ : 22.4, 24.1, 71.1, 76.2, 87.7, 116.3 (d, *J*<sub>CF</sub> = 19.4 Hz), 121.9 (d, *J*<sub>CF</sub> = 12.1 Hz), 124.2, 124.8 (d, *J*<sub>CF</sub> = 3.3 Hz), 125.8, 129.5, 130.5 (d, *J*<sub>CF</sub> = 8.2 Hz), 138.3, 154.2, 155.7, 157.8 (d, *J*<sub>CF</sub> = 248.4 Hz), 169.4; HRMS (ESI-TOF) *m/z*: Calcd. for C<sub>32</sub>H<sub>28</sub>F<sub>2</sub>N<sub>6</sub>NaO<sub>4</sub> [M+Na]<sup>+</sup>: 621.2032; Found: 621.2037.

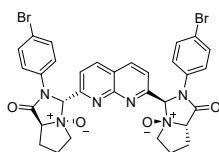

**L1e:** White solid, M.p. 247.3-248.3 °C,  $[\alpha]_D^{20} = +21.0$  (*c* 0.47, CHCl<sub>3</sub>); overall yield 51%, 18:1 dr; <sup>1</sup>H NMR (CD<sub>3</sub>OD, 400 MHz)  $\delta$ : 2.22-2.27 (m, 2H), 2.46-2.58 (m, 6H), 3.93-3.97 (m, 2H), 4.14-4.21 (m, 2H), 4.75-4.78 (m, 2H), 7.05 (s, 2H), 7.41-7.47 (m, 8H), 7.97 (d, *J* = 8.0 Hz, 2H), 8.56 (d, *J* = 8.4 Hz, 2H); <sup>13</sup>C NMR (CD<sub>3</sub>OD, 100 MHz)  $\delta$ : 26.2, 28.1, 74.8, 80.6, 90.9, 123.4, 127.9, 128.1, 129.7, 135.9, 138.7, 142.5, 158.3, 159.6, 172.6; HRMS (ESI-TOF) *m/z*: Calcd. for C<sub>32</sub>H<sub>28</sub>Br<sub>2</sub>N<sub>6</sub>NaO<sub>4</sub> [M+Na]<sup>+</sup>: 741.0417; Found: 741.0405.

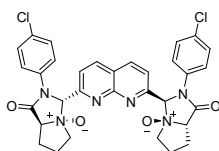

**L1f:** White solid, M.p. 260.4-260.9 °C,  $[\alpha]_D^{20} = +10.3$  (*c* 0.50, CHCl<sub>3</sub>); overall yield 52%, 17:1 dr; <sup>1</sup>H NMR (CD<sub>3</sub>OD, 400 MHz)  $\delta$ : 2.23-2.28 (m, 2H), 2.45-2.59 (m, 6H), 3.93-3.97 (m, 2H), 4.14-4.21 (m, 2H), 4.75-4.78 (m, 2H), 7.05 (s, 2H), 7.27-7.30 (m, 4H), 7.49-7.53 (m, 4H), 7.97 (d, *J* = 8.4 Hz, 2H), 8.57 (d, *J* = 8.4 Hz, 2H); <sup>13</sup>C NMR (CD<sub>3</sub>OD, 100 MHz)  $\delta$ : 22.3, 24.1, 70.8, 76.7, 87.0, 123.8, 124.2, 125.7, 128.9, 131.8, 134.3, 138.6, 154.4, 155.7, 168.7; HRMS (ESI-TOF) *m/z*: Calcd. for C<sub>32</sub>H<sub>28</sub>Cl<sub>2</sub>N<sub>6</sub>NaO<sub>4</sub> [M+Na]<sup>+</sup>: 653.1434; Found: 653.1428.

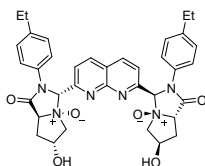

**L1g**: White solid, M.p. 241.6-242.3 °C,  $[\alpha]_D^{20} = -150.9$  (*c* 0.45, CHCl<sub>3</sub>); overall yield 45%, 17:1 dr; <sup>1</sup>H NMR (CD<sub>3</sub>OD, 400 MHz)  $\delta$ : 1.07-1.10 (m, 6H), 2.47-2.53 (m, 4H), 2.57-2.63 (m, 2H), 2.83-2.89 (m, 2H), 3.96 (d, *J* = 12.4 Hz, 2H), 4.41-4.45 (m, 2H), 4.66 (s, 2H), 5.03-5.06 (m, 2H), 6.99 (s, 2H), 7.10 (d, *J* = 8.8 Hz, 4H), 7.37 (d, *J* = 8.4 Hz, 4H), 7.93 (d, *J* = 8.4 Hz, 2H), 8.50 (d, *J* = 8.4 Hz, 2H); <sup>13</sup>C NMR (CD<sub>3</sub>OD, 100 MHz)  $\delta$ : 14.6, 27.9, 35.1, 69.9, 76.4, 76.8, 88.1, 122.8, 124.2, 125.7, 128.3, 132.9, 138.5, 143.3, 154.3, 155.6, 168.0; HRMS (ESI-TOF) *m/z*: Calcd. for C<sub>36</sub>H<sub>38</sub>N<sub>6</sub>NaO<sub>6</sub> [M+Na]<sup>+</sup>: 673.2745; Found: 673.2745.

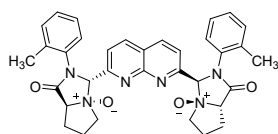

**L1h**: White solid, M.p. 223.2-224.0 °C,  $[\alpha]_D^{20} = -110.9$  (*c* 0.47, CHCl<sub>3</sub>); overall yield 41%, 15:1 dr; <sup>1</sup>H NMR (CD<sub>3</sub>OD, 400 MHz)  $\delta$ : 2.30-2.36 (m, 4H), 2.51 (s, 6H), 2.56-2.62 (m, 4H), 3.99-4.04 (m, 2H), 4.28-4.35 (m, 2H), 4.82-4.86 (m, 2H), 6.92 (s, 2H), 7.08-7.12 (m, 2H), 7.17-7.26 (m, 6H), 7.84 (d, *J* = 8.4 Hz, 2H), 8.46 (d, *J* = 8.4 Hz, 2H); <sup>13</sup>C NMR (CD<sub>3</sub>OD, 100 MHz)  $\delta$ : 17.8, 22.5, 23.8, 70.9, 76.7, 88.7, 124.2, 125.8, 126.5, 126.8, 128.7, 131.4, 133.0, 136.6, 138.1, 153.9, 155.7, 168.6; HRMS (ESI-TOF) *m/z*: Calcd. for C<sub>34</sub>H<sub>34</sub>N<sub>6</sub>NaO<sub>4</sub> [M+Na]<sup>+</sup>: 613.2517; Found: 613.2509.

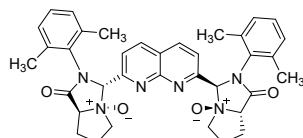

**L1i**: White solid, M.p. 236.0-237.1 °C,  $[\alpha]_D^{20} = +273.7$  (*c* 0.50, CHCl<sub>3</sub>); overall yield 40%, >20:1 dr; <sup>1</sup>H NMR (CD<sub>3</sub>OD, 400 MHz)  $\delta$ : 2.33 (s, 6H), 2.36-2.42 (m, 2H), 2.48 (s, 6H), 2.52-2.59 (m, 4H), 2.63-2.70 (m, 2H), 3.91-3.96 (m, 2H), 4.30-4.37 (m, 2H), 4.96-5.00 (m, 2H), 6.80 (s, 2H), 6.94-6.97 (m, 2H), 7.04-7.10 (m, 4H), 7.88 (d, *J* = 8.4 Hz, 2H), 8.36 (d, *J* = 8.4 Hz, 2H); <sup>13</sup>C NMR (CD<sub>3</sub>OD, 100 MHz)  $\delta$ : 18.4, 18.7, 22.8, 24.0, 70.6, 77.2, 88.2, 123.9, 125.7, 128.8, 129.0, 129.5, 131.0, 135.4, 137.6, 138.0, 153.0, 155.0, 168.1; HRMS (ESI-TOF) *m/z*: Calcd. for C<sub>36</sub>H<sub>38</sub>N<sub>6</sub>NaO<sub>4</sub> [M+Na]<sup>+</sup>: 641.2845; Found: 641.2836.

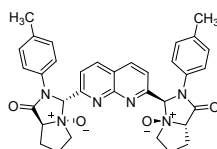

**L1j**: White solid, M.p. 239.0-239.9 °C,  $[\alpha]_D^{20} = +71.5$  (*c* 0.58, CHCl<sub>3</sub>); overall yield 51%, 18:1 dr; <sup>1</sup>H NMR (CD<sub>3</sub>OD, 400 MHz)  $\delta$ : 2.21 (s, 6H), 2.24-2.28 (m, 2H), 2.45-2.58 (m, 6H), 3.92-3.96 (m, 2H), 4.13-4.20 (m, 2H), 4.79-4.82 (m, 2H), 6.97 (s, 2H), 7.08 (d, *J* = 8.4 Hz, 4H), 7.35 (d, *J* = 8.8 Hz, 4H), 7.93 (d, *J* = 8.4 Hz, 2H), 8.53 (d, *J* = 8.4 Hz, 2H); <sup>13</sup>C NMR (CD<sub>3</sub>OD, 100 MHz)  $\delta$ : 19.6, 22.3, 24.1, 70.8, 76.9, 87.6, 122.6, 124.0, 125.6, 129.4, 132.9, 136.8, 138.4, 154.4, 156.0, 168.7; HRMS (ESI-TOF) *m/z*: Calcd. for C<sub>34</sub>H<sub>34</sub>N<sub>6</sub>NaO<sub>4</sub> [M+Na]<sup>+</sup>: 613.2534; Found: 613.2529.

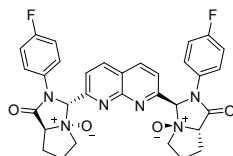

**L1k**: White solid, M.p. 245.7-246.6 °C,  $[\alpha]_D^{20} = +31.4$  (*c* 0.51, CHCl<sub>3</sub>); overall yield 48%, 17:1 dr; <sup>1</sup>H NMR (CD<sub>3</sub>OD, 400 MHz)  $\delta$ : 2.26-2.29 (m, 2H), 2.46-2.60 (m, 6H), 3.95-3.99 (m, 2H), 4.18-4.25 (m, 2H), 4.78-4.81 (m, 2H), 7.01-7.07 (m, 6H), 7.50-7.53 (m, 4H), 7.95 (d, *J* = 8.4 Hz, 2H), 8.55 (d, *J* = 8.4 Hz, 2H); <sup>13</sup>C NMR (CD<sub>3</sub>OD, 100 MHz)  $\delta$ : 22.3, 24.1, 70.8, 76.7, 87.6, 115.6 (d, *J*<sub>CF</sub> = 23.1 Hz), 124.2, 125.3 (d, *J*<sub>CF</sub> = 8.3 Hz), 125.8, 131.5, 138.5, 154.4, 155.8, 160.8 (d, *J*<sub>CF</sub> = 241.1 Hz), 168.9; HRMS (ESI-TOF) *m/z*: Calcd. for C<sub>32</sub>H<sub>28</sub>F<sub>2</sub>N<sub>6</sub>NaO<sub>4</sub> [M+Na]<sup>+</sup>: 621.2032; Found: 621.2036.

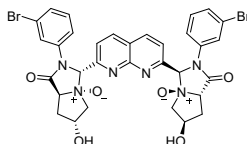

**L1l**: White solid, M.p. 232.9-233.2 °C; overall yield 44%, 12:1 dr; <sup>1</sup>H NMR (CD<sub>3</sub>OD, 400 MHz)  $\delta$ : 2.56-2.62 (m, 2H), 2.83-2.89 (m, 2H), 3.96 (d, *J* = 12.4 Hz, 2H), 4.41-4.45 (m, 2H), 4.65 (s, 2H), 4.95-4.98 (m, 2H), 7.09 (s, 2H), 7.14-7.18 (m, 2H), 7.28-7.30 (m, 2H), 7.36-7.39 (m, 2H), 7.87-7.88 (m, 2H), 7.98 (d, *J* = 8.4 Hz, 2H), 8.55 (d, *J* = 8.0 Hz, 2H); <sup>13</sup>C NMR (CD<sub>3</sub>OD, 100 MHz)  $\delta$ : 35.2, 69.9, 76.4, 76.6, 87.3, 120.7, 122.1, 124.3, 125.5, 125.9, 129.4, 130.4, 136.8, 138.6, 154.2, 155.1, 168.1; HRMS (ESI-TOF) *m/z*: Calcd. for C<sub>32</sub>H<sub>28</sub>Br<sub>2</sub>N<sub>6</sub>NaO<sub>6</sub> [M+Na]<sup>+</sup>: 773.0308; Found: 773.0299.

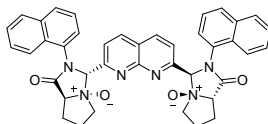

**L1m**: White solid; overall yield 41%, >20:1 dr;  $^1\text{H}$  NMR ( $\text{CD}_3\text{OD}$ , 400 MHz)  $\delta$ : 2.36-2.38 (m, 2H), 2.59-2.61 (m, 6H), 4.04-4.07 (m, 2H), 4.43-4.45 (m, 2H), 7.12 (s, 2H), 7.44-7.51 (m, 4H), 7.62-7.67 (m, 4H), 7.76-7.85 (m, 8H), 8.28 (d,  $J = 7.6$  Hz, 2H);  $^{13}\text{C}$  NMR ( $\text{CD}_3\text{OD}$ , 100 MHz)  $\delta$ : 22.5, 23.6, 70.6, 77.0, 89.3, 124.2, 125.1, 125.7, 126.3, 128.1, 129.2, 129.4, 134.7, 137.7, 153.7, 155.3, 169.0; HRMS (ESI-TOF)  $m/z$ : Calcd. for  $\text{C}_{40}\text{H}_{34}\text{N}_6\text{NaO}_4$   $[\text{M}+\text{Na}]^+$ : 685.2534; Found: 685.2531.

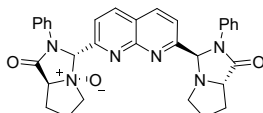

**L2a**: White solid; overall yield 31%, 12:1 dr;  $^1\text{H}$  NMR ( $\text{CD}_3\text{OD}$ , 400 MHz)  $\delta$ : 1.85-1.93 (m, 2H), 2.14-2.21 (m, 3H), 2.47-2.54 (m, 3H), 3.11-3.17 (m, 1H), 3.34-3.38 (m, 1H), 3.92-3.97 (m, 1H), 4.16-4.20 (m, 1H), 4.28-4.31 (m, 1H), 4.81-4.84 (m, 1H), 6.12 (s, 1H), 6.99 (s, 1H), 7.04-7.08 (m, 1H), 7.13-7.16 (m, 1H), 7.20-7.28 (m, 4H), 7.46-7.49 (m, 4H), 7.73 (d,  $J = 8.4$  Hz, 1H), 7.88 (d,  $J = 8.4$  Hz, 1H), 8.44 (d,  $J = 8.4$  Hz, 2H);  $^{13}\text{C}$  NMR ( $\text{CD}_3\text{OD}$ , 100 MHz)  $\delta$ : 22.3, 24.1, 24.4, 28.0, 56.1, 65.1, 70.8, 76.9, 85.0, 87.6, 120.9, 122.5, 122.7, 123.2, 125.7, 126.6, 128.7, 128.9, 135.5, 136.4, 138.3, 139.5, 154.2, 155.4, 163.3, 168.7, 175.0; HRMS (ESI-TOF)  $m/z$ : Calcd. for  $\text{C}_{32}\text{H}_{30}\text{N}_6\text{NaO}_3$   $[\text{M}+\text{Na}]^+$ : 569.2270; Found: 569.2265.

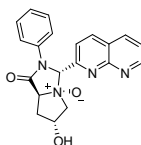

**L3a**: White solid, M.p. 203.4-204.7  $^\circ\text{C}$ ; overall yield 47%, 13:1 dr;  $^1\text{H}$  NMR ( $\text{CD}_3\text{OD}$ , 400 MHz)  $\delta$ : 2.62-2.69 (m, 1H), 2.87-2.93 (m, 1H), 3.99 (d,  $J = 8.4$  Hz, 1H), 4.48-4.53 (m, 1H), 4.69-4.72 (m, 1H), 5.08-5.11 (m, 1H), 7.07 (s, 1H), 7.13-7.17 (m, 1H), 7.26-7.30 (m, 2H), 7.50-7.53 (m, 2H), 7.64-7.67 (m, 1H), 7.91 (d,  $J = 8.0$  Hz, 1H), 8.44-8.49 (m, 2H), 9.06-9.08 (m, 1H);  $^{13}\text{C}$  NMR ( $\text{CD}_3\text{OD}$ , 100 MHz)  $\delta$ : 35.1, 69.9, 76.4, 76.8, 88.0, 123.0, 123.3, 123.7, 125.1, 126.8, 128.9, 135.3, 138.3, 138.5, 154.0, 154.4, 154.7, 168.1; HRMS (ESI-TOF)  $m/z$ : Calcd. for  $\text{C}_{20}\text{H}_{18}\text{N}_4\text{NaO}_3$   $[\text{M}+\text{Na}]^+$ : 385.1271; Found: 385.1267.

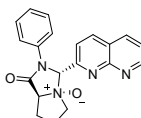

**L4a:** White solid, M.p. 215.5-216.9 °C; overall yield 51%, 12:1 dr; <sup>1</sup>H NMR (CD<sub>3</sub>OD, 400 MHz) δ: 2.25-2.32 (m, 1H), 2.48-2.62 (m, 3H), 3.96-4.01 (m, 1H), 4.20-4.27 (m, 1H), 4.85-4.88 (m, 1H), 7.06 (s, 1H), 7.13-7.17 (m, 1H), 7.26-7.30 (m, 2H), 7.53-7.55 (m, 2H), 7.63-7.66 (m, 1H), 7.93 (d, *J* = 8.4 Hz, 1H), 8.44-8.47 (m, 1H), 8.49 (d, *J* = 8.0 Hz, 1H), 9.05-9.07 (m, 1H); <sup>13</sup>C NMR (CD<sub>3</sub>OD, 100 MHz) δ: 22.3, 24.1, 70.8, 76.9, 87.5, 122.9, 123.3, 123.7, 125.1, 126.7, 128.9, 135.5, 138.3, 138.5, 153.9, 154.5, 155.1, 168.7; HRMS (ESI-TOF) *m/z*: Calcd. for C<sub>20</sub>H<sub>18</sub>N<sub>4</sub>NaO<sub>2</sub> [M+Na]<sup>+</sup>: 369.1322; Found: 369.1316.

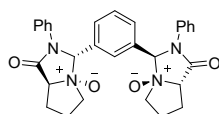

**L7a:** White solid; overall yield 47%, 18:1 dr; <sup>1</sup>H NMR (CD<sub>3</sub>OD, 400 MHz) δ: 2.22-2.25 (m, 2H), 2.39-2.53 (m, 6H), 3.83-3.86 (m, 2H), 3.96-4.05 (m, 2H), 4.26-4.29 (m, 2H), 6.76 (s, 2H), 7.18-7.22 (m, 2H), 7.29-7.33 (m, 4H), 7.48-7.51 (m, 5H), 7.63-7.70 (m, 3H); <sup>13</sup>C NMR (CD<sub>3</sub>OD, 100 MHz) δ: 22.3, 24.0, 70.4, 76.1, 87.8, 122.6, 126.6, 128.8, 129.1, 131.0, 135.5, 167.8; HRMS (ESI-TOF) *m/z*: Calcd. for C<sub>30</sub>H<sub>30</sub>N<sub>4</sub>NaO<sub>4</sub> [M+Na]<sup>+</sup>: 533.2159; Found: 533.2152.

#### 4. The gram scale synthesis of the Nar-2NO ligand L1a

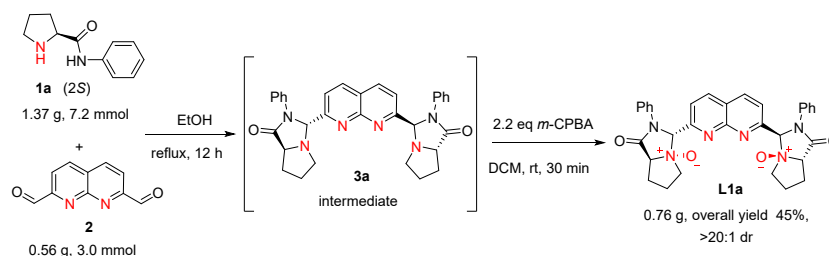

In a sealed tube equipped with a magnetic stirring bar, naphthyridine-dicarbaldehyde **2** (0.56 g, 3.0 mmol) and optically pure prolinamide **1a** (1.37 g, 7.2 mmol) were added. Then, ethanol (30.0 mL) was added and the reaction was heated with stirring at reflux for 12 h. After completion of the reaction, as indicated by TLC, the aftertreatment residue was purified by flash column chromatography to give the intermediate **3a**.

In a sealed tube equipped with a magnetic stirring bar, to the intermediate **3** was added 20.0 mL of DCM and *m*-CPBA (2.2 eq). The reaction mixture was stirred at rt for 30 min. After completion of the reaction, as indicated by TLC, the aftertreatment residue was purified by flash column chromatography to furnish the Nar-2NO ligand **L1a** (0.76 g, overall yield 45%, >20:1 dr).



## 5. Catalytic asymmetric synthesis of compounds 6

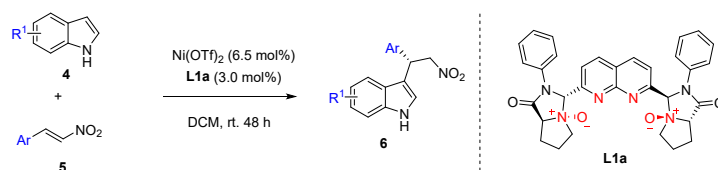

In a sealed tube equipped with a magnetic stirring bar, to the mixture of  $\text{Ni}(\text{OTf})_2$  (6.5 mol %), **L1a** (3.0 mol %) in 2.0 mL of  $\text{CH}_2\text{Cl}_2$  was added **4** (0.30 mmol), and **5** (0.20 mmol). The reaction mixture was stirred at room temperature for 48 h and was directly loaded onto a silica gel and purified by flash chromatography to give the desired product **6**, using hexane/EtOAc (10/1, v/v) as the eluent.

## 6. Characterization data of compounds 6

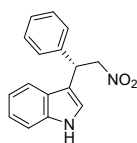

**6a**: Product in accordance with literature characterization data<sup>7</sup>. Light yellow oil,  $[\alpha]_{\text{D}}^{20} = +20.3$  ( $c$  0.8,  $\text{CHCl}_3$ ), 90% yield, 93% ee; The ee was determined by HPLC analysis using a Chiralpak IC column (90/10 hexane/*i*-PrOH; flow rate: 1.0 mL/min;  $\lambda = 254$  nm;  $\tau_{\text{major}} = 8.38$  min;  $\tau_{\text{minor}} = 10.39$  min);  $^1\text{H}$  NMR ( $\text{CDCl}_3$ , 400 MHz)  $\delta$ : 4.82-4.87 (m, 1H), 4.94-4.99 (m, 1H), 5.08-5.12 (m, 1H), 6.91 (d,  $J = 2.4$  Hz, 1H), 6.97-7.01 (m, 1H), 7.09-7.26 (m, 7H), 7.36 (d,  $J = 8.0$  Hz, 1H), 7.99 (br s, 1H);  $^{13}\text{C}$  NMR ( $\text{CDCl}_3$ , 100 MHz)  $\delta$ : 40.5, 78.5, 110.4, 113.3, 117.9, 118.9, 120.6, 121.6, 125.0, 126.5, 126.7, 127.9, 135.4, 138.2.

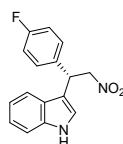

**6b**: Product in accordance with literature characterization data<sup>7</sup>. Light yellow oil,  $[\alpha]_{\text{D}}^{20} = +30.7$  ( $c$  1.01,  $\text{CHCl}_3$ ), 91% yield, 90% ee; The ee was determined by HPLC analysis using a Chiralpak IC column (95/5 hexane/*i*-PrOH; flow rate: 1.0 mL/min;  $\lambda = 254$  nm;  $\tau_{\text{major}} = 13.83$  min;  $\tau_{\text{minor}} = 18.89$  min);  $^1\text{H}$  NMR ( $\text{CDCl}_3$ , 400 MHz)  $\delta$ : 4.78-4.83 (m, 1H), 4.93-4.98 (m, 1H), 5.06-5.10 (m, 1H), 6.89-6.93 (m, 3H), 6.97-7.01 (m, 1H), 7.10-7.14 (m, 1H), 7.18-7.22 (m, 2H), 7.25 (d,  $J = 8.0$

Hz, 1H), 7.30-7.32 (m, 1H), 8.06 (br s, 1H);  $^{13}\text{C}$  NMR ( $\text{CDCl}_3$ , 100 MHz)  $\delta$ : 39.8, 78.5, 110.4, 113.1, 114.8 (d,  $J_{\text{CF}} = 21.3$  Hz), 117.8, 119.0, 120.4, 121.7, 124.9, 128.3 (d,  $J_{\text{CF}} = 8.4$  Hz), 133.9 (d,  $J_{\text{CF}} = 3.3$  Hz), 135.5, 161.7 (d,  $J_{\text{CF}} = 245.3$  Hz).

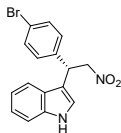

**6c:** Product in accordance with literature characterization data<sup>7</sup>. Light yellow oil,  $[\alpha]_{\text{D}}^{20} = -1.5$  (*c* 0.91,  $\text{CHCl}_3$ ), 92% yield, 92% ee; The ee was determined by HPLC analysis using a Chiralpak IC column (95/5 hexane/*i*-PrOH; flow rate: 1.0 mL/min;  $\lambda = 254$  nm;  $\tau_{\text{major}} = 15.10$  min;  $\tau_{\text{minor}} = 20.24$  min);  $^1\text{H}$  NMR ( $\text{CDCl}_3$ , 400 MHz)  $\delta$ : 4.78-4.83 (m, 1H), 4.93-4.98 (m, 1H), 5.04-5.08 (m, 1H), 6.90-6.91 (m, 1H), 6.98-7.02 (m, 1H), 7.10-7.14 (m, 3H), 7.26-7.37 (m, 4H), 8.04 (br s, 1H);  $^{13}\text{C}$  NMR ( $\text{CDCl}_3$ , 100 MHz)  $\delta$ : 40.0, 78.2, 110.5, 112.8, 117.7, 119.1, 120.5, 120.6, 121.8, 124.8, 128.5, 131.0, 135.5, 137.2.

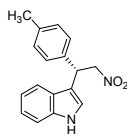

**6d:** Product in accordance with literature characterization data<sup>7</sup>. Light yellow oil,  $[\alpha]_{\text{D}}^{20} = +16.0$  (*c* 1.01,  $\text{CHCl}_3$ ), 90% yield, 92% ee; The ee was determined by HPLC analysis using a Chiralpak IC column (95/5 hexane/*i*-PrOH; flow rate: 1.0 mL/min;  $\lambda = 254$  nm;  $\tau_{\text{major}} = 14.11$  min;  $\tau_{\text{minor}} = 18.90$  min);  $^1\text{H}$  NMR ( $\text{CDCl}_3$ , 400 MHz)  $\delta$ : 2.22 (s, 3H), 4.80-4.85 (m, 1H), 4.93-4.98 (m, 1H), 5.04-5.08 (m, 1H), 6.90-6.91 (m, 1H), 6.97-7.04 (m, 3H), 7.08-7.14 (m, 3H), 7.23-7.26 (m, 1H), 7.35-7.37 (m, 1H), 7.99 (br s, 1H);  $^{13}\text{C}$  NMR ( $\text{CDCl}_3$ , 100 MHz)  $\delta$ : 20.0, 40.2, 78.6, 110.3, 113.5, 117.9, 118.9, 120.5, 121.6, 125.1, 126.6, 128.6, 135.1, 135.4, 136.2.

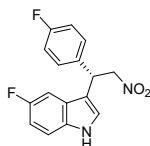

**6e:** Product in accordance with literature characterization data<sup>7</sup>. Light yellow oil, 83% yield, 92% ee; The ee was determined by HPLC analysis using a Chiralpak IB column (60/40 hexane/*i*-PrOH; flow rate: 1.0 mL/min;  $\lambda = 254$  nm;  $\tau_{\text{major}} = 6.54$  min;  $\tau_{\text{minor}} = 7.43$  min);  $^1\text{H}$  NMR ( $\text{CDCl}_3$ , 400

MHz)  $\delta$ : 4.78-4.83 (m, 1H), 4.91-4.96 (m, 1H), 5.00-5.03 (m, 1H), 6.84-6.95 (m, 4H), 7.09 (d,  $J = 2.4$  Hz, 1H), 7.17-7.21 (m, 3H), 8.10 (br s, 1H);  $^{13}\text{C}$  NMR ( $\text{CDCl}_3$ , 100 MHz)  $\delta$ : 39.7, 78.4, 102.8 (d,  $J_{\text{CF}} = 22.1$  Hz), 110.2 (d,  $J_{\text{CF}} = 26.3$  Hz), 111.1 (d,  $J_{\text{CF}} = 9.3$  Hz), 113.5 (d,  $J_{\text{CF}} = 5.1$  Hz), 114.9 (d,  $J_{\text{CF}} = 22.3$  Hz), 122.0, 125.3 (d,  $J_{\text{CF}} = 10.0$  Hz), 128.3 (d,  $J_{\text{CF}} = 8.4$  Hz), 132.0, 133.6 (d,  $J_{\text{CF}} = 3.1$  Hz), 157.1 (d,  $J_{\text{CF}} = 235.3$  Hz), 161.2 (d,  $J_{\text{CF}} = 245.0$  Hz).

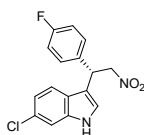

**6f**: Light yellow oil, 89% yield, 91% ee; The ee was determined by HPLC analysis using a Chiralpak IB column (60/40 hexane/*i*-PrOH; flow rate: 1.0 mL/min;  $\lambda = 254$  nm;  $\tau_{\text{major}} = 7.17$  min;  $\tau_{\text{minor}} = 6.26$  min);  $^1\text{H}$  NMR ( $\text{CDCl}_3$ , 400 MHz)  $\delta$ : 4.77-4.82 (m, 1H), 4.91-4.96 (m, 1H), 5.02-5.06 (m, 1H), 6.90-6.96 (m, 4H), 7.16-7.19 (m, 3H), 7.24-7.25 (m, 1H), 8.08 (br s, 1H);  $^{13}\text{C}$  NMR ( $\text{CDCl}_3$ , 100 MHz)  $\delta$ : 39.7, 78.4, 110.4, 113.3, 114.9 (d,  $J_{\text{CF}} = 22.3$  Hz), 118.7, 119.8, 121.0, 123.5, 127.7, 128.3 (d,  $J_{\text{CF}} = 8.2$  Hz), 133.6 (d,  $J_{\text{CF}} = 4.4$  Hz), 135.8, 161.6 (d,  $J_{\text{CF}} = 245.1$  Hz); HRMS (ESI-TOF)  $m/z$ : Calcd. for  $\text{C}_{16}\text{H}_{12}\text{ClFN}_2\text{NaO}_2$  [ $\text{M}+\text{Na}$ ] $^+$ : 341.0464; Found: 341.0458.

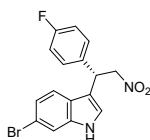

**6g**: Light yellow oil, 87% yield, 92% ee; The ee was determined by HPLC analysis using a Chiralpak IC column (95/5 hexane/*i*-PrOH; flow rate: 1.0 mL/min;  $\lambda = 254$  nm;  $\tau_{\text{major}} = 12.50$  min;  $\tau_{\text{minor}} = 14.88$  min);  $^1\text{H}$  NMR ( $\text{CDCl}_3$ , 400 MHz)  $\delta$ : 4.77-4.82 (m, 1H), 4.91-4.96 (m, 1H), 5.03-5.07 (m, 1H), 6.90-6.95 (m, 3H), 7.06-7.20 (m, 4H), 7.42 (d,  $J = 1.2$  Hz, 1H), 8.10 (br s, 1H);  $^{13}\text{C}$  NMR ( $\text{CDCl}_3$ , 100 MHz)  $\delta$ : 39.7, 78.4, 113.4, 114.9 (d,  $J_{\text{CF}} = 22.4$  Hz), 115.4, 119.1, 120.9, 122.3, 123.8, 128.3 (d,  $J_{\text{CF}} = 8.4$  Hz), 133.6 (d,  $J_{\text{CF}} = 3.2$  Hz), 136.3, 161.7 (d,  $J_{\text{CF}} = 245.2$  Hz); HRMS (ESI-TOF)  $m/z$ : Calcd. for  $\text{C}_{16}\text{H}_{12}\text{BrFN}_2\text{NaO}_2$  [ $\text{M}+\text{Na}$ ] $^+$ : 384.9958; Found: 384.9963.

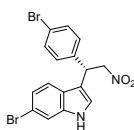

**6h**: Light yellow oil, 88% yield, 94% ee; The ee was determined by HPLC analysis using a

Chiralpak IC column (95/5 hexane/*i*-PrOH; flow rate: 1.0 mL/min;  $\lambda = 254$  nm;  $\tau_{major} = 13.52$  min;  $\tau_{minor} = 15.83$  min);  $^1\text{H}$  NMR ( $\text{CDCl}_3$ , 400 MHz)  $\delta$ : 4.77-4.82 (m, 1H), 4.90-4.95 (m, 1H), 5.00-5.03 (m, 1H), 6.92-6.93 (m, 1H), 7.06-7.11 (m, 4H), 7.34-7.37 (m, 2H), 7.42 (d,  $J = 1.2$  Hz, 1H), 8.16 (br s, 1H);  $^{13}\text{C}$  NMR ( $\text{CDCl}_3$ , 100 MHz)  $\delta$ : 38.5, 76.8, 111.7, 112.1, 114.1, 117.7, 119.4, 119.7, 121.1, 122.5, 127.1, 129.8, 134.9, 135.6; HRMS (ESI-TOF)  $m/z$ : Calcd. for  $\text{C}_{16}\text{H}_{12}\text{Br}_2\text{N}_2\text{NaO}_2$   $[\text{M}+\text{Na}]^+$ : 444.9158; Found: 444.9163.

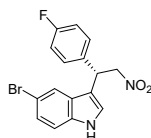

**6i**: Product in accordance with literature characterization data<sup>7</sup>. Light yellow oil,  $[\alpha]_{\text{D}}^{20} = -20.0$  ( $c$  0.91,  $\text{CHCl}_3$ ), 84% yield, 91% ee; The ee was determined by HPLC analysis using a Chiralpak IB column (60/40 hexane/*i*-PrOH; flow rate: 1.0 mL/min;  $\lambda = 254$  nm;  $\tau_{major} = 8.24$  min;  $\tau_{minor} = 6.33$  min);  $^1\text{H}$  NMR ( $\text{CDCl}_3$ , 400 MHz)  $\delta$ : 4.76-4.81 (m, 1H), 4.89-4.94 (m, 1H), 5.00-5.04 (m, 1H), 6.90-6.96 (m, 3H), 7.12-7.20 (m, 4H), 7.42 (d,  $J = 1.2$  Hz, 1H), 8.15 (br s, 1H);  $^{13}\text{C}$  NMR ( $\text{CDCl}_3$ , 100 MHz)  $\delta$ : 39.6, 78.4, 111.9, 112.2, 112.7, 114.9 (d,  $J_{\text{CF}} = 21.4$  Hz), 120.3, 121.6, 124.7, 126.7, 128.2 (d,  $J_{\text{CF}} = 9.0$  Hz), 133.4 (d,  $J_{\text{CF}} = 3.3$  Hz), 134.1, 161.5 (d,  $J_{\text{CF}} = 245.0$  Hz).

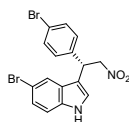

**6j**: Product in accordance with literature characterization data<sup>7</sup>. Light yellow oil, 83% yield, 93% ee; The ee was determined by HPLC analysis using a Chiralpak IB column (60/40 hexane/*i*-PrOH; flow rate: 1.0 mL/min;  $\lambda = 254$  nm;  $\tau_{major} = 9.65$  min;  $\tau_{minor} = 7.99$  min);  $^1\text{H}$  NMR ( $\text{DMSO-}d_6$ , 400 MHz)  $\delta$ : 5.07-5.12 (m, 1H), 5.28-5.38 (m, 2H), 7.18-7.20 (m, 1H), 7.33 (d,  $J = 7.6$  Hz, 1H), 7.44-7.52 (m, 5H), 7.74 (d,  $J = 1.6$  Hz, 1H), 11.31 (br s, 1H);  $^{13}\text{C}$  NMR ( $\text{DMSO-}d_6$ , 100 MHz)  $\delta$ : 40.6, 79.1, 112.0, 113.4, 114.1, 120.6, 121.1, 124.5, 124.6, 128.2, 130.6, 131.9, 135.3, 140.5.

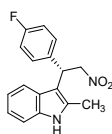

**6k**: Product in accordance with literature characterization data<sup>7</sup>. Light yellow oil, 90% yield, 91%

ee; The ee was determined by HPLC analysis using a Chiralpak IC column (95/5 hexane/*i*-PrOH; flow rate: 1.0 mL/min;  $\lambda = 254$  nm;  $\tau_{major} = 20.60$  min;  $\tau_{minor} = 13.93$  min);  $^1\text{H}$  NMR ( $\text{CDCl}_3$ , 400 MHz)  $\delta$ : 2.29 (s, 3H), 4.97-5.01 (m, 1H), 5.06-5.14 (m, 2H), 6.87-6.97 (m, 3H), 7.02-7.06 (m, 1H), 7.17-7.21 (m, 3H), 7.25 (d,  $J = 7.6$  Hz, 1H), 7.83 (br s, 1H);  $^{13}\text{C}$  NMR ( $\text{CDCl}_3$ , 100 MHz)  $\delta$ : 10.9, 38.8, 77.6, 107.6, 109.8, 114.6 (d,  $J_{CF} = 22.3$  Hz), 117.4, 118.8, 120.4, 125.6, 127.8 (d,  $J_{CF} = 8.4$  Hz), 131.8, 134.2 (d,  $J_{CF} = 3.3$  Hz), 134.4, 160.5 (d,  $J_{CF} = 244.3$  Hz).

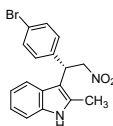

**6l**: Product in accordance with literature characterization data<sup>7</sup>. Light yellow oil, 91% yield, 90% ee; The ee was determined by HPLC analysis using a Chiralpak IC column (95/5 hexane/*i*-PrOH; flow rate: 1.0 mL/min;  $\lambda = 254$  nm;  $\tau_{major} = 19.29$  min;  $\tau_{minor} = 13.02$  min);  $^1\text{H}$  NMR ( $\text{CDCl}_3$ , 400 MHz)  $\delta$ : 2.31 (s, 3H), 4.96-5.14 (m, 3H), 6.94-6.98 (m, 1H), 7.02-7.06 (m, 1H), 7.10 (d,  $J = 8.4$  Hz, 2H), 7.18-7.25 (m, 2H), 7.34 (d,  $J = 8.4$  Hz, 2H), 7.85 (br s, 1H);  $^{13}\text{C}$  NMR ( $\text{CDCl}_3$ , 100 MHz)  $\delta$ : 11.0, 38.9, 77.3, 107.3, 109.8, 117.4, 118.9, 120.0, 120.5, 125.6, 128.0, 130.8, 131.9, 134.4, 137.5.

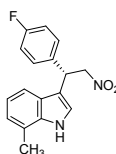

**6m**: Product in accordance with literature characterization data<sup>7</sup>. Light yellow oil, 86% yield, 90% ee; The ee was determined by HPLC analysis using a Chiralpak IC column (95/5 hexane/*i*-PrOH; flow rate: 1.0 mL/min;  $\lambda = 254$  nm;  $\tau_{major} = 11.11$  min;  $\tau_{minor} = 12.70$  min);  $^1\text{H}$  NMR ( $\text{CDCl}_3$ , 400 MHz)  $\delta$ : 2.37 (s, 3H), 4.78-4.83 (m, 1H), 4.93-4.98 (m, 1H), 5.05-5.09 (m, 1H), 6.88-6.93 (m, 5H), 7.16-7.22 (m, 3H), 7.98 (br s, 1H);  $^{13}\text{C}$  NMR ( $\text{CDCl}_3$ , 100 MHz)  $\delta$ : 15.5, 39.9, 78.5, 113.7, 114.7 (d,  $J_{CF} = 22.1$  Hz), 115.5, 119.2, 119.7, 120.1, 122.3, 124.5, 128.3 (d,  $J_{CF} = 8.4$  Hz), 134.0 (d,  $J_{CF} = 3.1$  Hz), 135.1, 160.7 (d,  $J_{CF} = 244.4$  Hz).

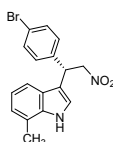

**6n**: Light yellow oil, 85% yield, 90% ee; The ee was determined by HPLC analysis using a Chiralpak IC column (95/5 hexane/*i*-PrOH; flow rate: 1.0 mL/min;  $\lambda = 254$  nm;  $\tau_{major} = 12.08$  min;  $\tau_{minor} = 13.53$  min);  $^1\text{H}$  NMR ( $\text{CDCl}_3$ , 400 MHz)  $\delta$ : 2.37 (s, 3H), 4.78-4.83 (m, 1H), 4.93-4.98 (m, 1H), 5.03-5.07 (m, 1H), 6.91-6.93 (m, 3H), 7.10-7.13 (m, 2H), 7.15-7.17 (m, 1H), 7.33-7.36 (m, 2H), 7.99 (br s, 1H);  $^{13}\text{C}$  NMR ( $\text{CDCl}_3$ , 100 MHz)  $\delta$ : 15.5, 40.1, 78.2, 113.2, 115.4, 119.3, 119.7, 120.2, 120.4, 122.3, 124.4, 128.5, 131.0, 135.1, 137.3; HRMS (ESI-TOF)  $m/z$ : Calcd. for  $\text{C}_{17}\text{H}_{15}\text{BrN}_2\text{NaO}_2$   $[\text{M}+\text{Na}]^+$ : 381.0209; Found: 381.0204.

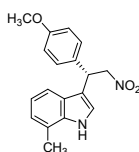

**6o**: Light yellow oil, 84% yield, 91% ee; The ee was determined by HPLC analysis using a Chiralpak IC column (95/5 hexane/*i*-PrOH; flow rate: 1.0 mL/min;  $\lambda = 254$  nm;  $\tau_{major} = 19.60$  min;  $\tau_{minor} = 22.08$  min);  $^1\text{H}$  NMR ( $\text{DMSO}-d_6$ , 400 MHz)  $\delta$ : 2.42 (s, 3H), 3.68 (s, 3H), 4.95-5.00 (m, 1H), 5.20-5.33 (m, 2H), 6.82-6.85 (m, 4H), 7.28-7.39 (m, 4H), 10.98 (br s, 1H);  $^{13}\text{C}$  NMR ( $\text{DMSO}-d_6$ , 100 MHz)  $\delta$ : 17.2, 39.4, 55.4, 79.9, 114.3, 114.7, 116.5, 119.3, 121.1, 122.3, 126.2, 129.3, 133.1, 136.2, 158.6; HRMS (ESI-TOF)  $m/z$ : Calcd. for  $\text{C}_{18}\text{H}_{18}\text{N}_2\text{NaO}_3$   $[\text{M}+\text{Na}]^+$ : 333.1210; Found: 333.1213.

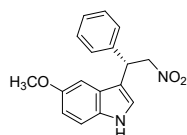

**6p**: Product in accordance with literature characterization data<sup>7</sup>. Light yellow oil,  $[\alpha]_D^{20} = -20.7$  ( $c$  1.21,  $\text{CHCl}_3$ ), 92% yield, 90% ee; The ee was determined by HPLC analysis using a Chiralpak IC column (90/10 hexane/*i*-PrOH; flow rate: 1.0 mL/min;  $\lambda = 254$  nm;  $\tau_{major} = 13.04$  min;  $\tau_{minor} = 14.86$  min);  $^1\text{H}$  NMR ( $\text{CDCl}_3$ , 400 MHz)  $\delta$ : 3.67 (s, 3H), 4.80-4.85 (m, 1H), 4.91-4.96 (m, 1H), 5.02-5.06 (m, 1H), 6.74-6.77 (m, 2H), 6.86 (d,  $J = 2.4$  Hz, 1H), 7.10-7.23 (m, 6H), 7.96 (br s, 1H);  $^{13}\text{C}$  NMR ( $\text{CDCl}_3$ , 100 MHz)  $\delta$ : 40.5, 54.8, 78.4, 99.8, 111.1, 111.6, 112.9, 121.3, 125.5, 126.5, 126.7, 127.9, 130.6, 138.2, 153.1.

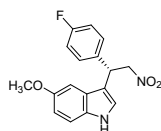

**6q:** Product in accordance with literature characterization data<sup>7</sup>. Light yellow oil, 91% yield, 90% ee; The ee was determined by HPLC analysis using a Chiralpak IB column (60/40 hexane/*i*-PrOH; flow rate: 1.0 mL/min;  $\lambda = 254$  nm;  $\tau_{major} = 25.57$  min;  $\tau_{minor} = 31.41$  min); <sup>1</sup>H NMR (CDCl<sub>3</sub>, 400 MHz)  $\delta$ : 3.69 (s, 3H), 4.77-4.83 (m, 1H), 4.92-4.97 (m, 1H), 5.01-5.05 (m, 1H), 6.72 (d,  $J = 2.4$  Hz, 1H), 6.76-6.79 (m, 1H), 6.89-6.94 (m, 3H), 7.14-7.23 (m, 3H), 8.01 (br s, 1H); <sup>13</sup>C NMR (CDCl<sub>3</sub>, 100 MHz)  $\delta$ : 39.8, 54.8, 78.5, 99.8, 111.2, 111.7, 112.8, 114.8 (d,  $J_{CF} = 22.4$  Hz), 121.1, 125.4, 128.3 (d,  $J_{CF} = 8.3$  Hz), 130.6, 133.9 (d,  $J_{CF} = 3.2$  Hz), 153.2, 161.6 (d,  $J_{CF} = 245.1$  Hz).

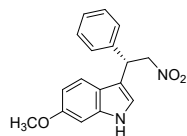

**6r:** Product in accordance with literature characterization data<sup>7</sup>. Light yellow oil, 92% yield, 99% ee; The ee was determined by HPLC analysis using a Chiralpak IB column (60/40 hexane/*i*-PrOH; flow rate: 1.0 mL/min;  $\lambda = 254$  nm;  $\tau_{major} = 7.84$  min;  $\tau_{minor} = 10.24$  min); <sup>1</sup>H NMR (CDCl<sub>3</sub>, 400 MHz)  $\delta$ : 3.70 (s, 3H), 4.78-4.83 (m, 1H), 4.90-4.95 (m, 1H), 5.01-5.05 (m, 1H), 6.62-6.65 (m, 1H), 6.71 (d,  $J = 2.0$  Hz, 1H), 6.77 (d,  $J = 1.6$  Hz, 1H), 7.14-7.22 (m, 6H), 7.90 (br s, 1H); <sup>13</sup>C NMR (CDCl<sub>3</sub>, 100 MHz)  $\delta$ : 40.5, 54.5, 78.6, 93.7, 93.8, 108.9, 113.2, 113.3, 118.5, 119.3, 119.4, 119.5, 126.5, 126.7, 127.8, 136.3, 138.2, 138.3, 155.7.

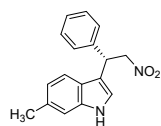

**6s:** Product in accordance with literature characterization data<sup>7</sup>. Light yellow oil, 91% yield, 92% ee; The ee was determined by HPLC analysis using a Chiralpak IC column (95/5 hexane/*i*-PrOH; flow rate: 1.0 mL/min;  $\lambda = 254$  nm;  $\tau_{major} = 35.16$  min;  $\tau_{minor} = 39.26$  min); <sup>1</sup>H NMR (CDCl<sub>3</sub>, 400 MHz)  $\delta$ : 2.33 (s, 3H), 4.78-4.83 (m, 1H), 4.90-4.95 (m, 1H), 5.02-5.06 (m, 1H), 6.78-6.82 (m, 2H), 7.01 (s, 1H), 7.13-7.23 (m, 6H), 7.88 (br s, 1H); <sup>13</sup>C NMR (CDCl<sub>3</sub>, 100 MHz)  $\delta$ : 20.6, 40.6, 78.5, 110.3, 123.0, 117.5, 120.0, 120.6, 122.9, 126.4, 126.7, 127.8, 131.4, 135.9, 138.3.

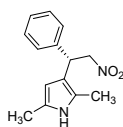

**6t:** Light yellow oil, 81% yield, 80% ee; The ee was determined by HPLC analysis using a Chiralpak IA column (85/15 hexane/*i*-PrOH; flow rate: 1.0 mL/min;  $\lambda = 254$  nm;  $\tau_{major} = 7.50$  min;  $\tau_{minor} = 10.34$  min);  $^1\text{H NMR}$  ( $\text{CD}_3\text{OD}$ , 400 MHz)  $\delta$ : 2.05 (s, 3H), 2.11 (s, 3H), 4.62-4.66 (m, 1H), 4.74-4.79 (m, 1H), 4.82-4.87 (m, 1H), 5.66 (s, 1H), 7.12-7.16 (m, 1H), 7.20-7.26 (m, 4H), 9.53 (br s, 1H);  $^{13}\text{C NMR}$  ( $\text{CD}_3\text{OD}$ , 100 MHz)  $\delta$ : 9.4, 11.5, 41.5, 79.9, 103.2, 116.1, 122.2, 125.2, 126.3, 127.4, 128.1, 141.5; HRMS (ESI-TOF)  $m/z$ : Calcd. for  $\text{C}_{14}\text{H}_{16}\text{N}_2\text{NaO}_2$   $[\text{M}+\text{Na}]^+$ : 267.1104; Found: 267.1107.

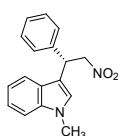

**6u:** Product in accordance with literature characterization data<sup>7</sup>. Light yellow oil,  $[\alpha]_{\text{D}}^{20} = +17.1$  ( $c$  1.12,  $\text{CHCl}_3$ ), 68% yield, 83% ee; The ee was determined by HPLC analysis using a Chiralpak IB column (85/15 hexane/*i*-PrOH; flow rate: 1.0 mL/min;  $\lambda = 254$  nm;  $\tau_{major} = 28.57$  min;  $\tau_{minor} = 31.67$  min);  $^1\text{H NMR}$  ( $\text{CDCl}_3$ , 400 MHz)  $\delta$ : 3.74 (s, 3H), 5.03-5.07 (m, 1H), 5.25-5.35 (m, 2H), 6.96-7.00 (m, 1H), 7.11-7.15 (m, 1H), 7.18-7.22 (m, 1H), 7.27-7.31 (m, 2H), 7.36-7.41 (m, 3H), 7.45 (d,  $J = 7.6$  Hz, 2H);  $^{13}\text{C NMR}$  ( $\text{CDCl}_3$ , 100 MHz)  $\delta$ : 32.9, 41.0, 79.5, 110.3, 113.3, 119.1, 119.3, 122.0, 127.1, 127.4, 127.8, 128.3, 129.0, 137.0, 141.1.

## 7. References

- (a) Z. Y. Yu, J. N. Zhao, F. Yang, X. F. Tang, Y. F. Wu, C. F. Ma, B. Song, L. Yun and Q. W. Meng, *RSC Advances*, 2020, **10**, 4825; (b) J. Ma and S. R. Kass, *J. Org. Chem.*, 2019, **84**, 11125; (c) S. F. Lu, D. M. Du, and J. Xu, *Org. Lett.*, 2006, **8**, 2115; (d) Y. X. Jia, S. F. Zhu, Y. Yang, and Q. L. Zhou, *J. Org. Chem.*, 2006, **71**, 75; (e) P. K. Singh, A. Bisai, V. K. Singh, *Tetrahedron Lett.*, 2007, **48**, 1127; (f) M. S. Islam, A. S. Alammari, A. Barakat, S. Alshahrani, M. Haukka and A. M. Al-Majid, *Molecules*, 2021, **26**, 7408.

## 8. X-ray crystal data for compounds 6a



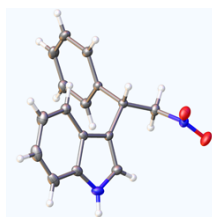

CCDC 2336676

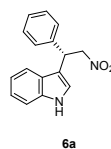

6a

**Table S1 Crystal data and structure refinement for 6a**

|                                             |                                                                               |
|---------------------------------------------|-------------------------------------------------------------------------------|
| Identification code                         | <b>6a</b>                                                                     |
| Empirical formula                           | C <sub>17</sub> H <sub>15</sub> Cl <sub>3</sub> N <sub>2</sub> O <sub>2</sub> |
| Formula weight                              | 385.66                                                                        |
| Temperature/K                               | 293.15                                                                        |
| Crystal system                              | monoclinic                                                                    |
| Space group                                 | P2 <sub>1</sub>                                                               |
| a/Å, b/Å, c/Å                               | 12.7168(2), 5.91860(8), 13.1408(2)                                            |
| α/°, β/°, γ/°                               | 90, 114.224(2), 90                                                            |
| Volume/Å <sup>3</sup>                       | 901.97(3)                                                                     |
| Z                                           | 2                                                                             |
| ρ <sub>calc</sub> /cm <sup>3</sup>          | 1.420                                                                         |
| μ/mm <sup>-1</sup>                          | 4.704                                                                         |
| F(000)                                      | 396.0                                                                         |
| Radiation                                   | Cu Kα (λ = 1.54184)                                                           |
| Crystal size/mm <sup>3</sup>                | 0.15 × 0.13 × 0.12                                                            |
| 2θ range for data collection/°              | 7.376 to 153.066                                                              |
| Index ranges                                | -15 ≤ h ≤ 15, -5 ≤ k ≤ 7, -16 ≤ l ≤ 15                                        |
| Reflections collected                       | 7626                                                                          |
| Independent reflections                     | 3022 [R <sub>int</sub> = 0.0197, R <sub>sigma</sub> = 0.0170]                 |
| Data/restraints/parameters                  | 3022/1/218                                                                    |
| Goodness-of-fit on F <sup>2</sup>           | 1.038                                                                         |
| Final R indexes [I ≥ 2σ(I)]                 | R <sub>1</sub> = 0.0685, wR <sub>2</sub> = 0.2019                             |
| Final R indexes [all data]                  | R <sub>1</sub> = 0.0695, wR <sub>2</sub> = 0.2034                             |
| Largest diff. peak/hole / e Å <sup>-3</sup> | 0.61/-0.47                                                                    |
| Flack parameter                             | 0.033(8)/0.045(4)                                                             |

**Crystal Data** for C<sub>17</sub>H<sub>15</sub>Cl<sub>3</sub>N<sub>2</sub>O<sub>2</sub> (*M* = 385.66 g/mol): monoclinic, space group P2<sub>1</sub> (no. 4), *a* = 12.7168(2) Å, *b* = 5.91860(8) Å, *c* = 13.1408(2) Å, β = 114.224(2)°, *V* = 901.97(3) Å<sup>3</sup>, *Z* = 2, *T* = 293.15 K, μ(Cu Kα) = 4.704 mm<sup>-1</sup>, *D*<sub>calc</sub> = 1.420 g/cm<sup>3</sup>, 7626 reflections measured (7.376° ≤ 2θ ≤ 153.066°), 3022 unique (*R*<sub>int</sub> = 0.0197, *R*<sub>sigma</sub> = 0.0170) which were used in all calculations. The final *R*<sub>1</sub> was 0.0685 (*I* > 2σ(*I*)) and *wR*<sub>2</sub> was 0.2034 (all data).

## 9. The copies of <sup>1</sup>H NMR, <sup>13</sup>C NMR and HPLC spectra for compounds L and 6

### <sup>1</sup>H and <sup>13</sup>C NMR of L1a

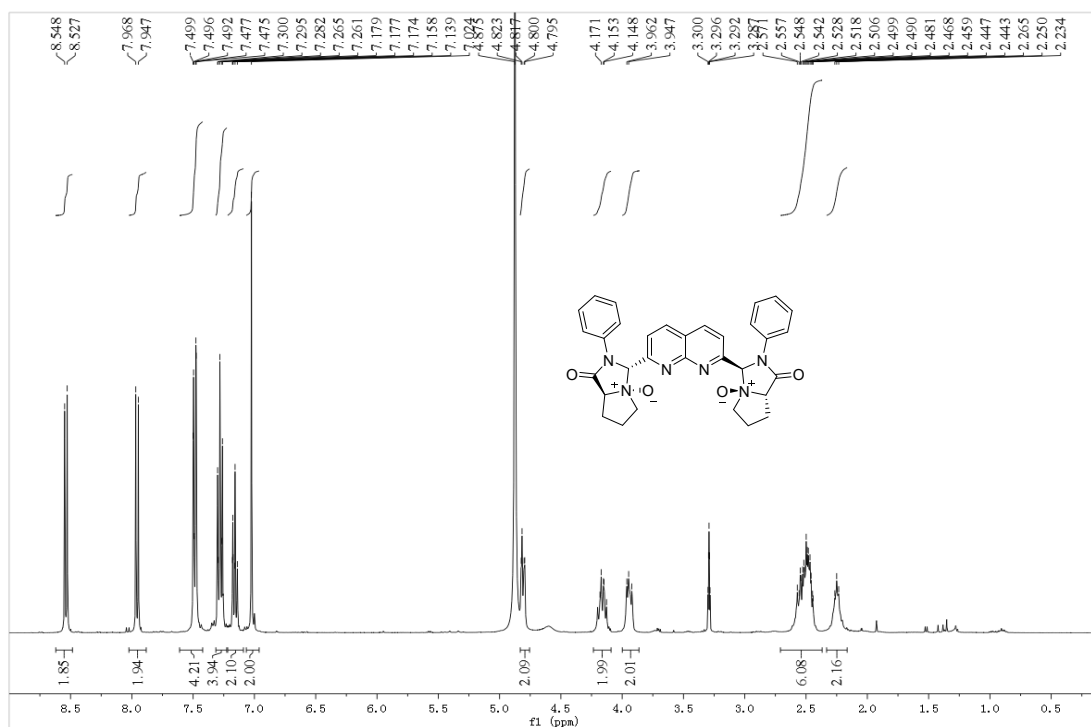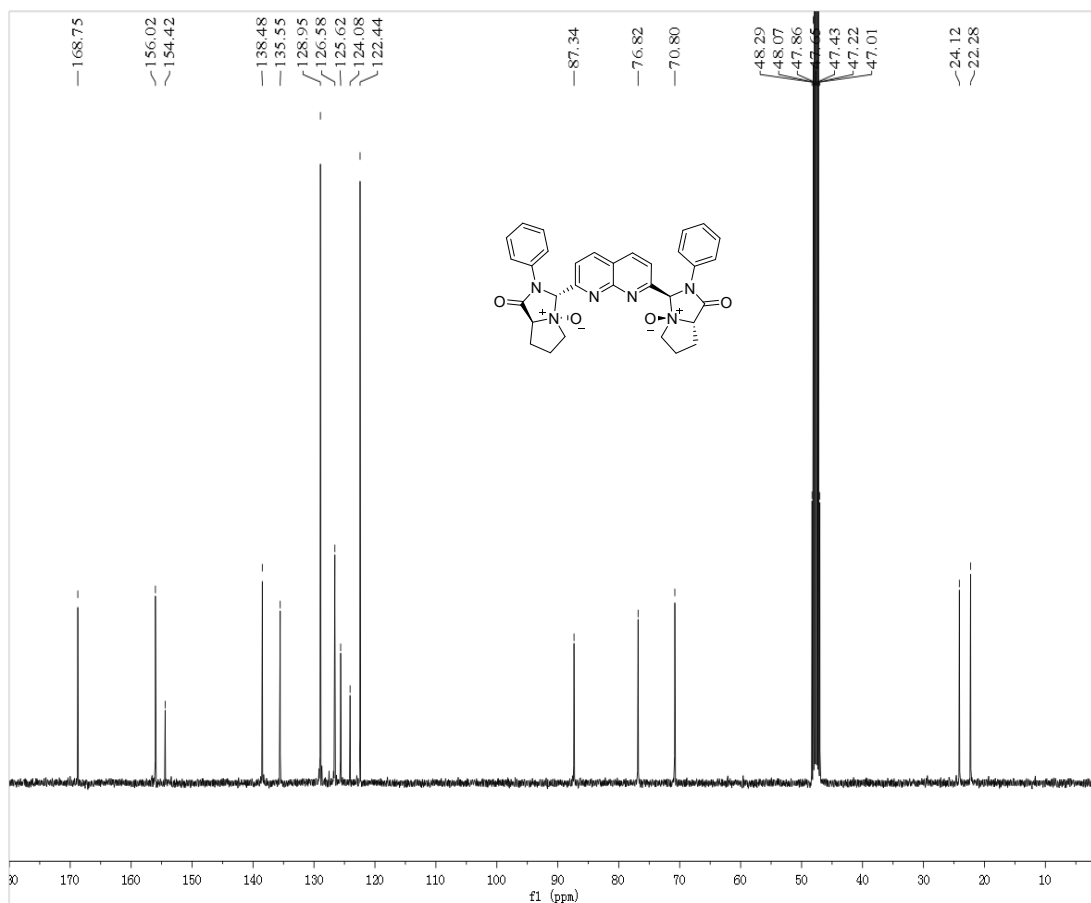

**<sup>1</sup>H and <sup>13</sup>C NMR of L1b**

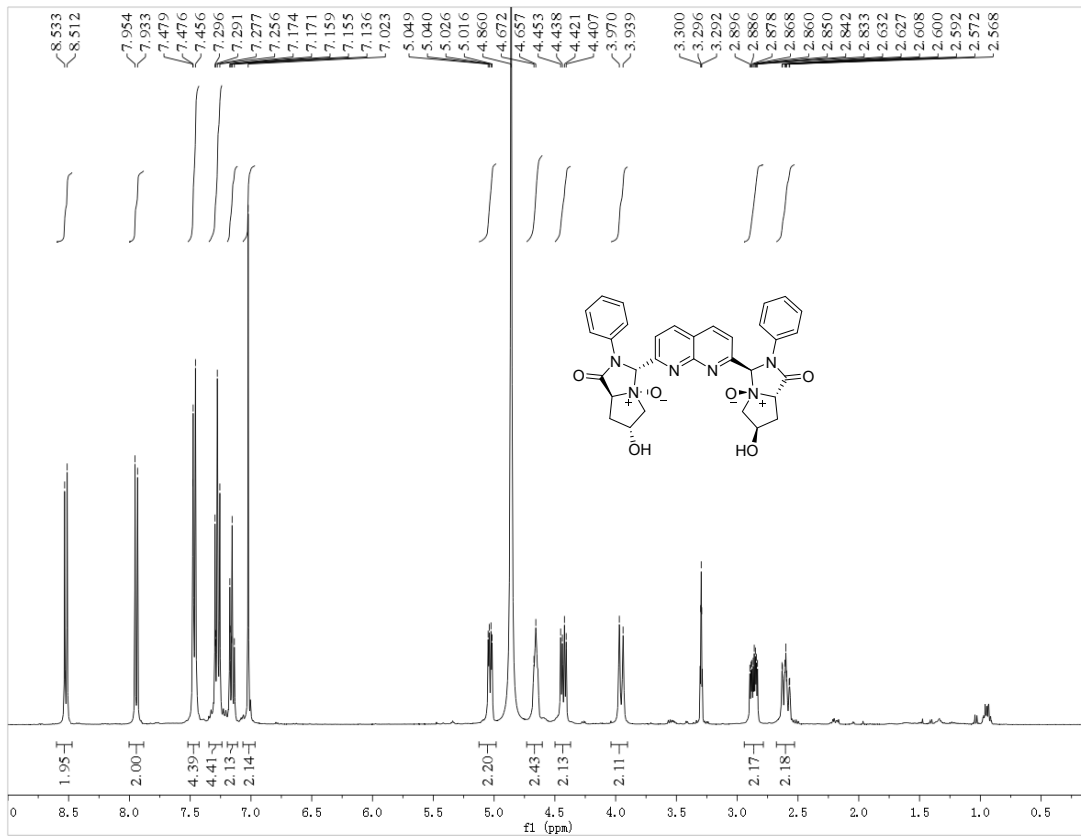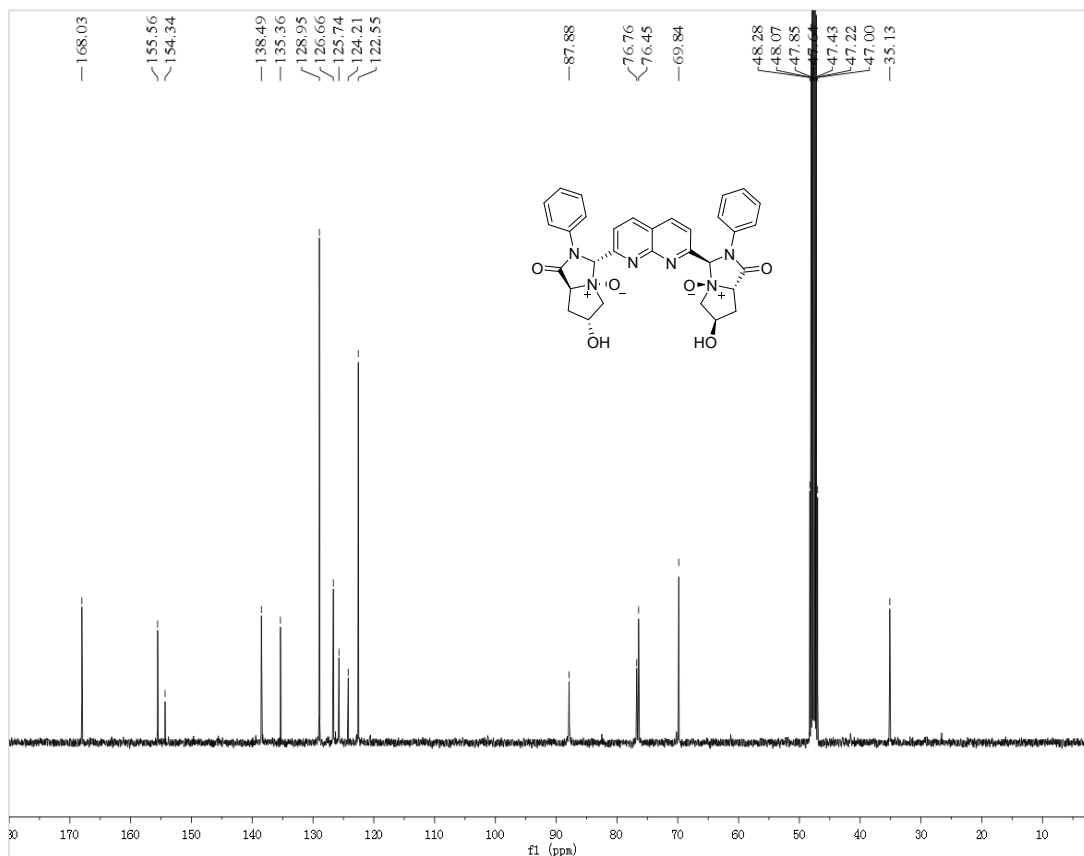

**<sup>1</sup>H and <sup>13</sup>C NMR of L1c**

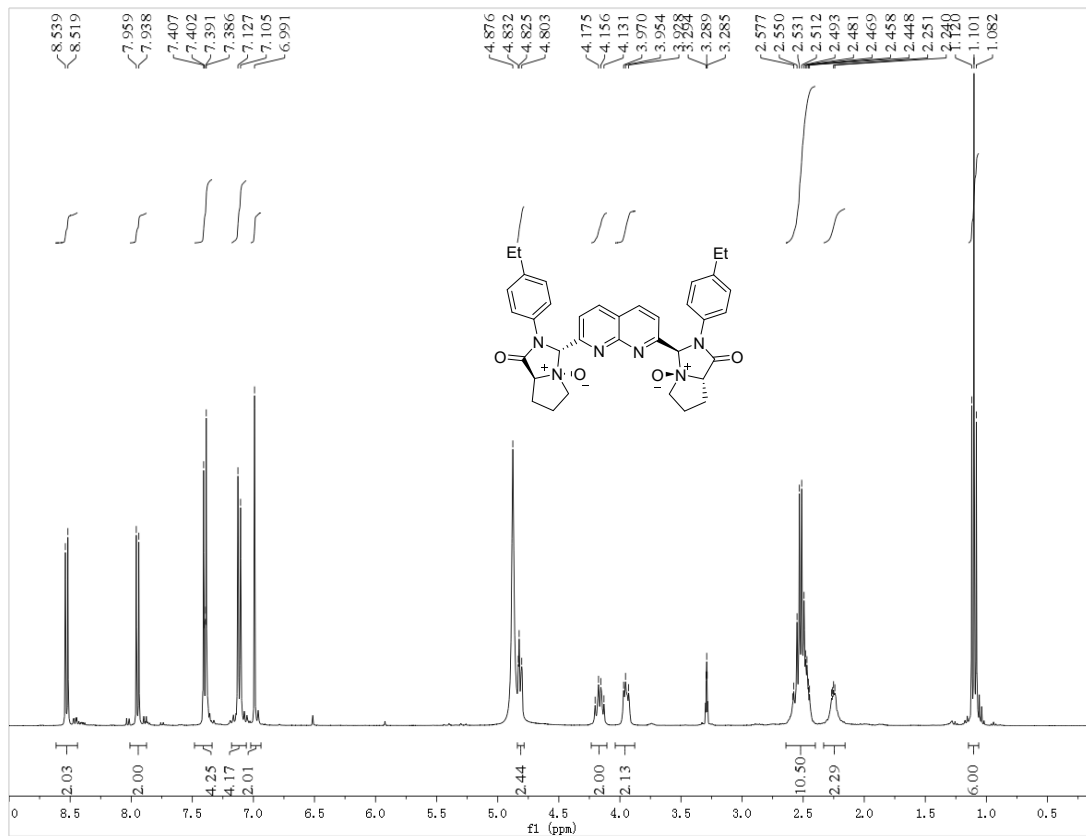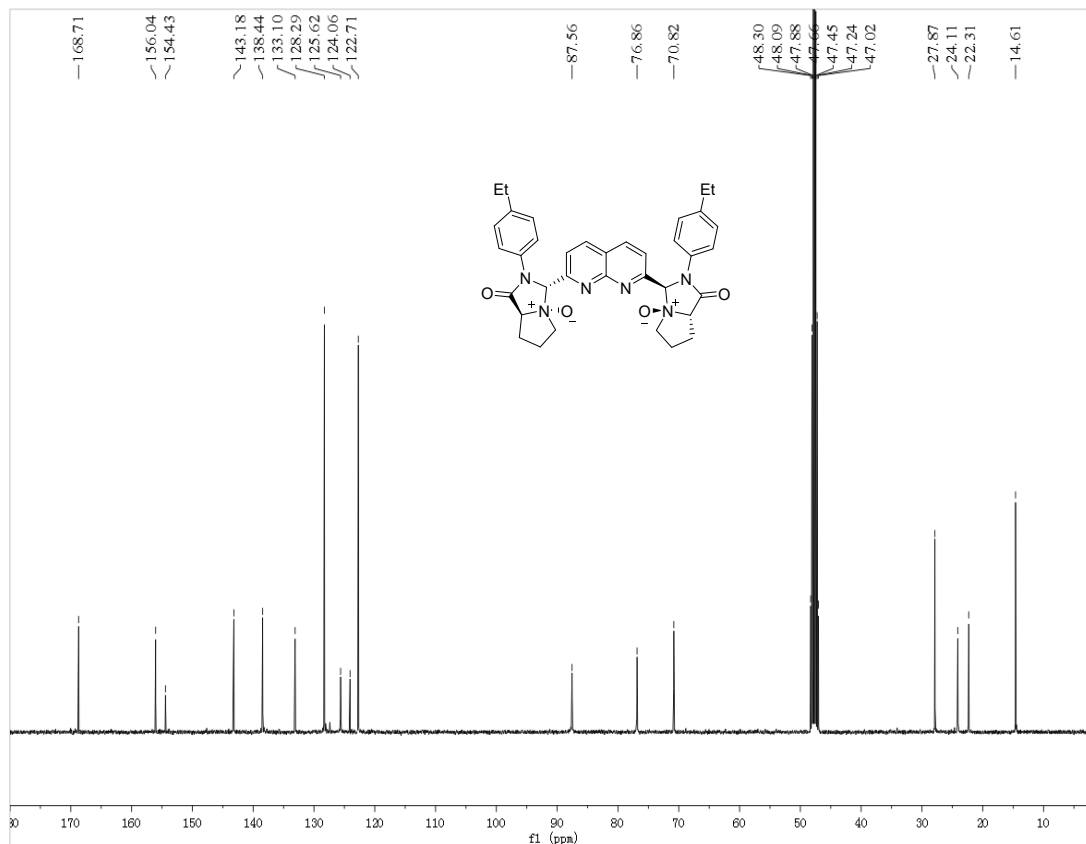

**<sup>1</sup>H and <sup>13</sup>C NMR of L1d**

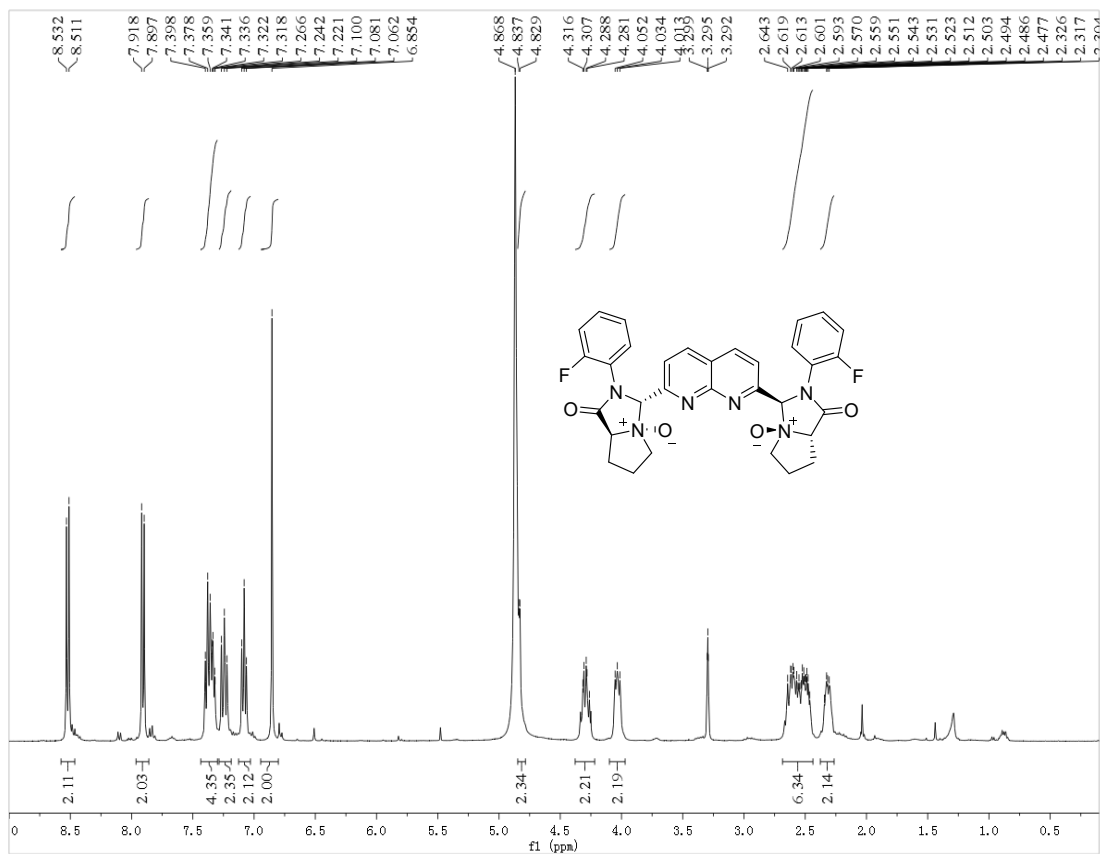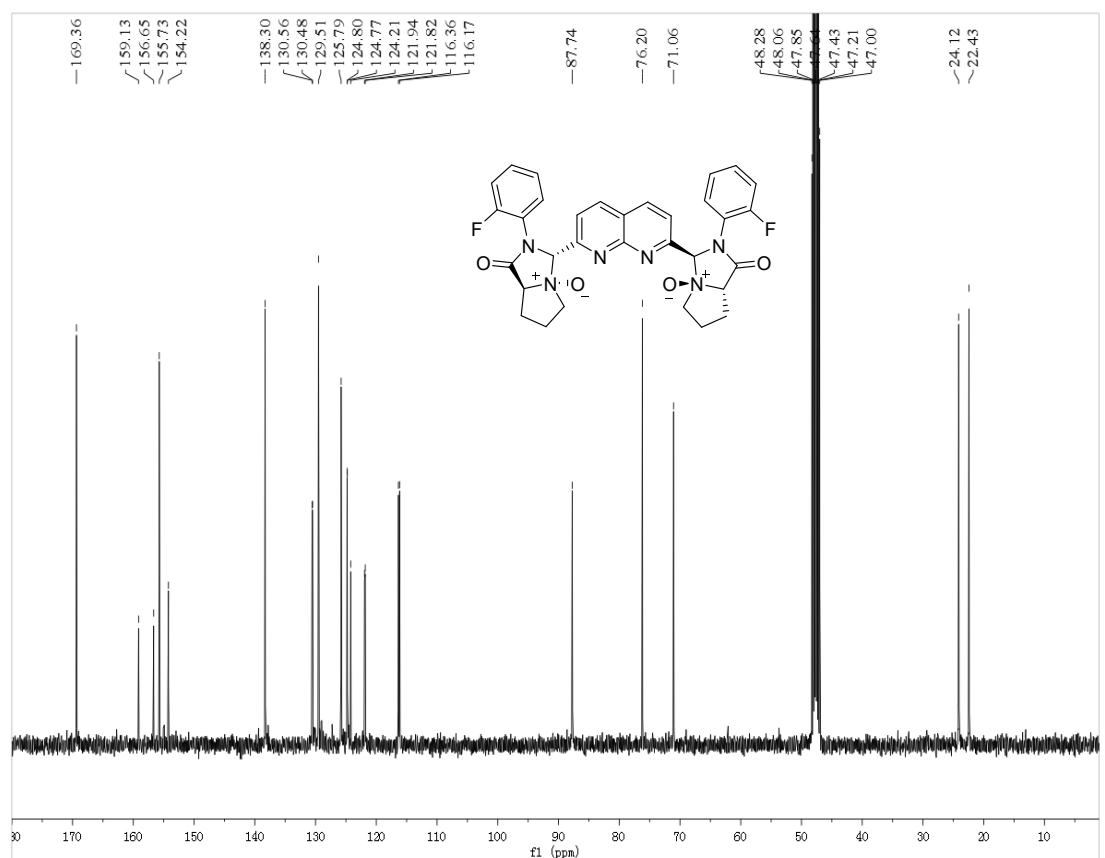

**<sup>1</sup>H and <sup>13</sup>C NMR of L1e**

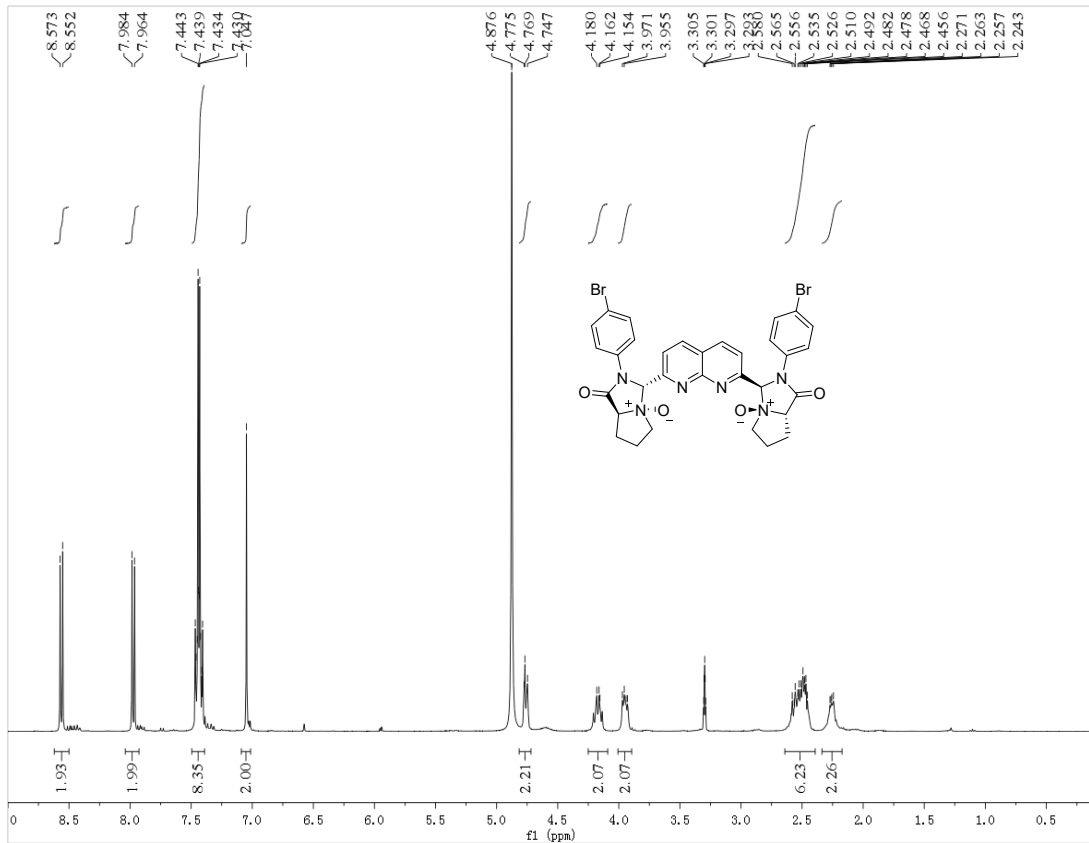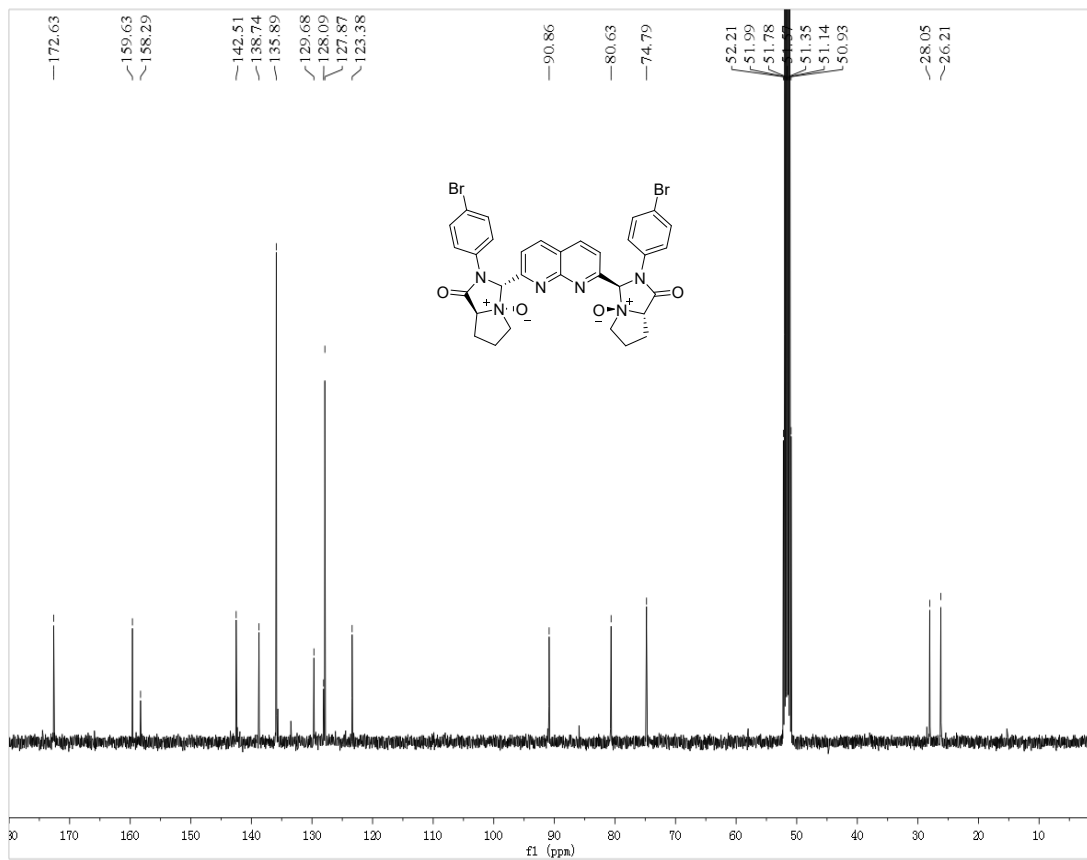

**<sup>1</sup>H and <sup>13</sup>C NMR of L1f**

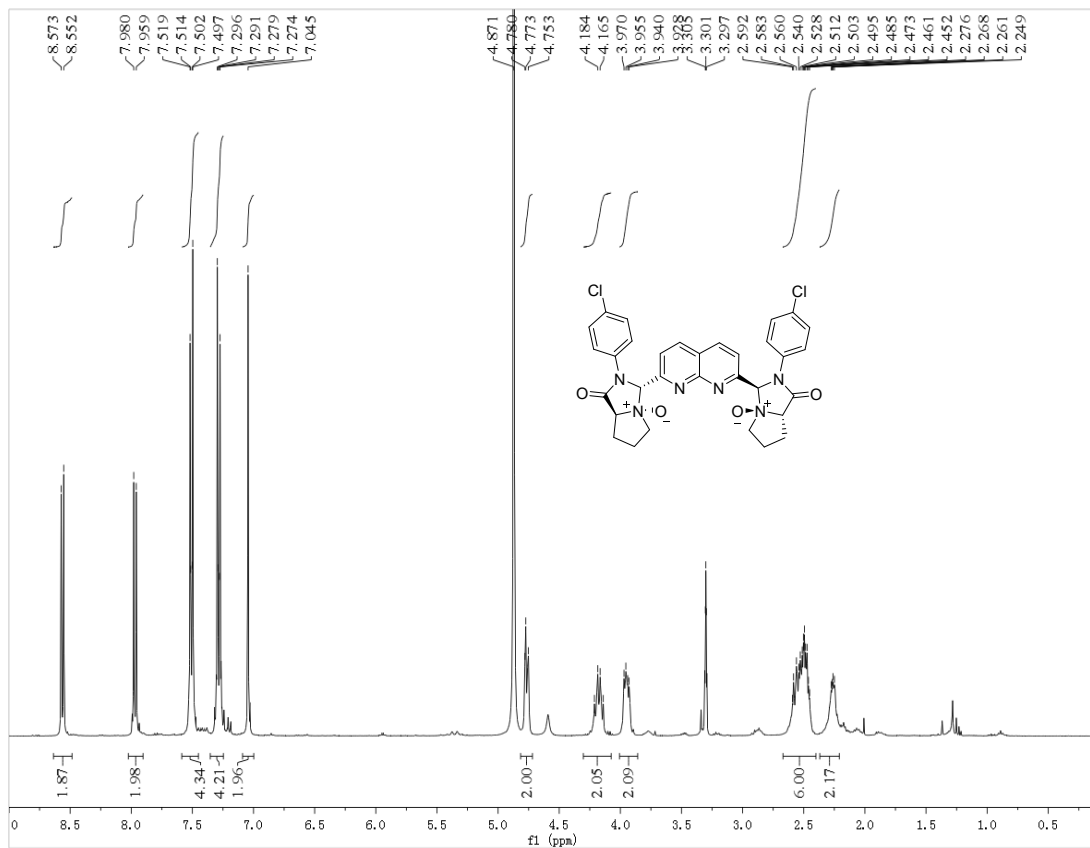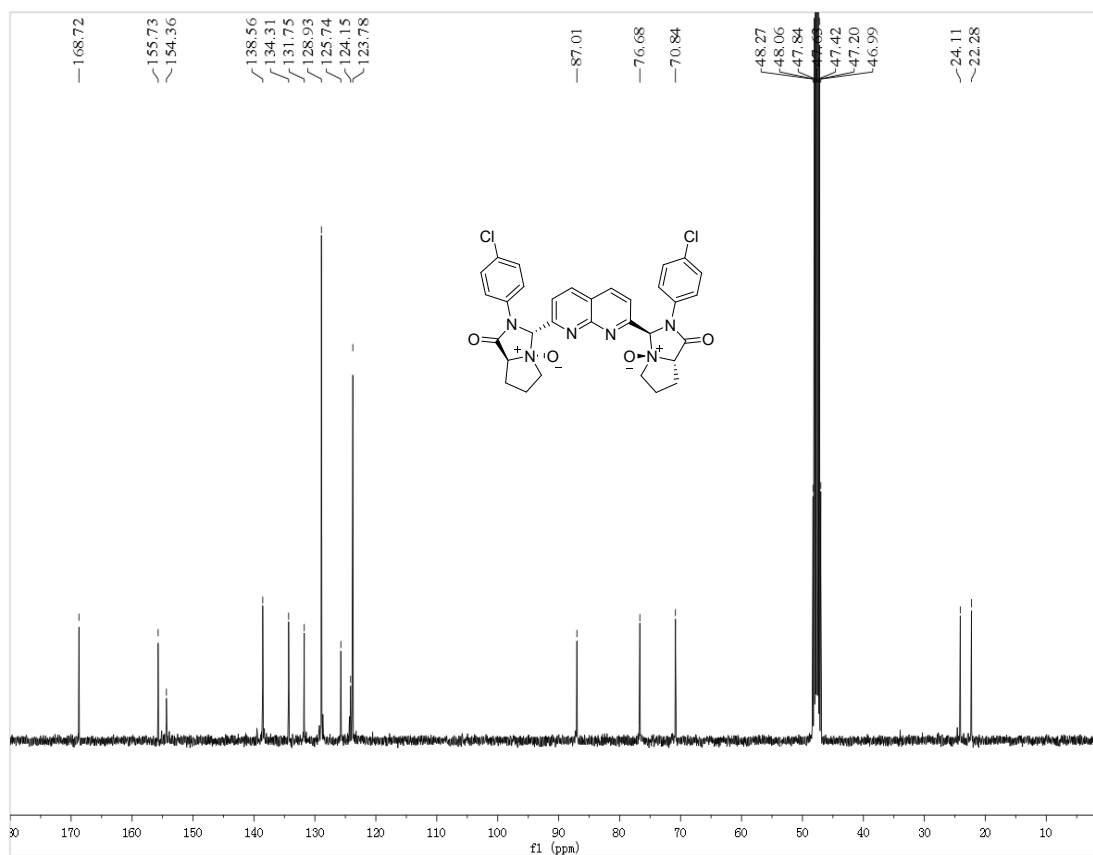

**<sup>1</sup>H and <sup>13</sup>C NMR of L1g**

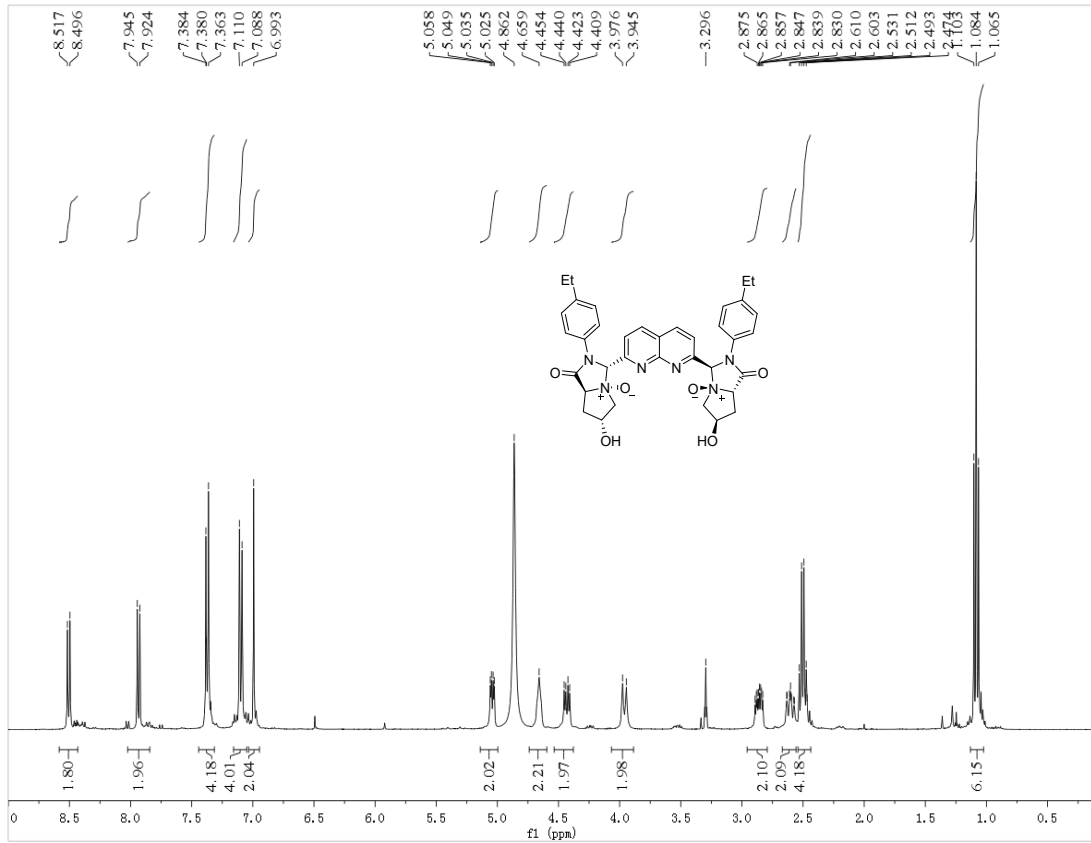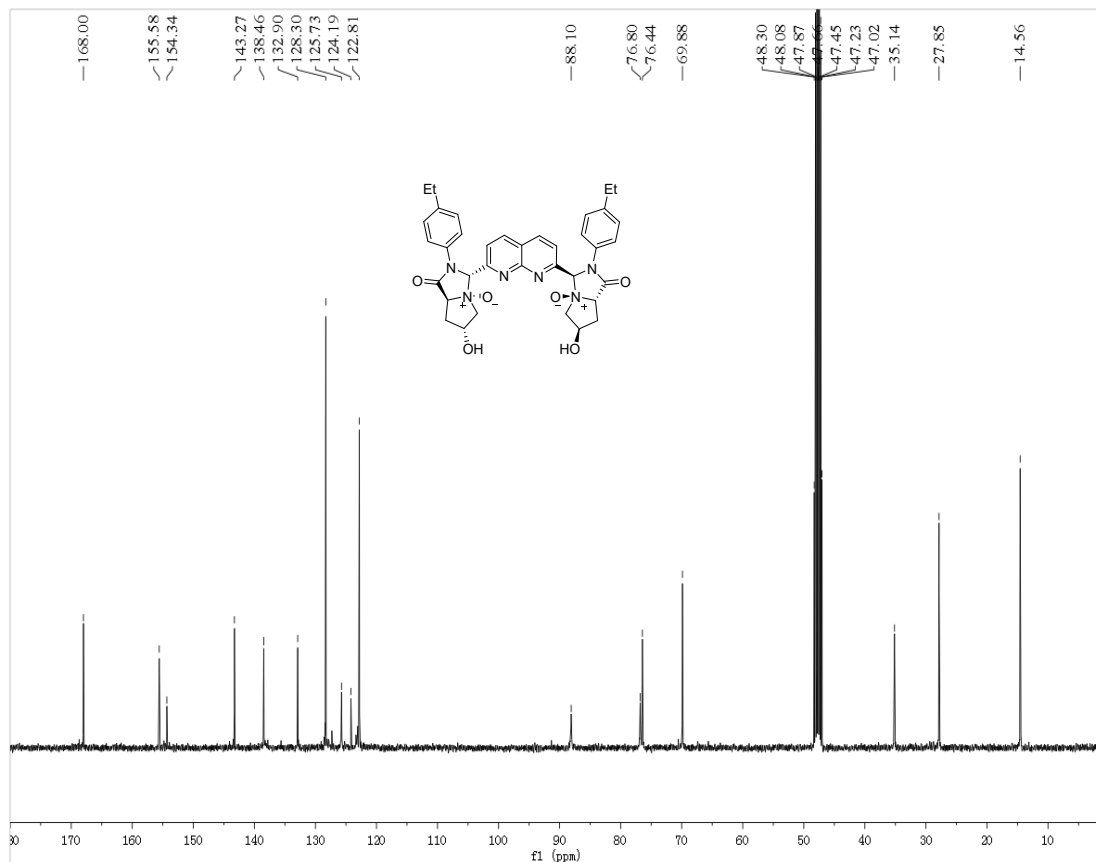

**<sup>1</sup>H and <sup>13</sup>C NMR of L1h**



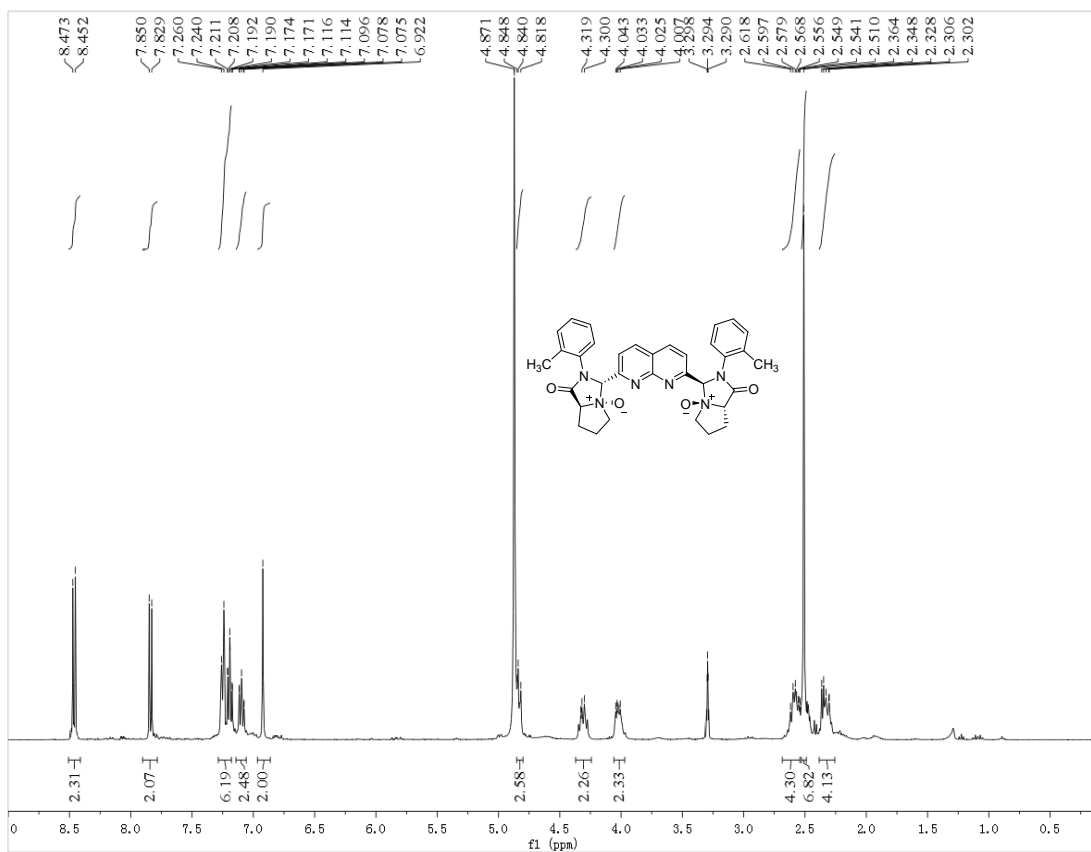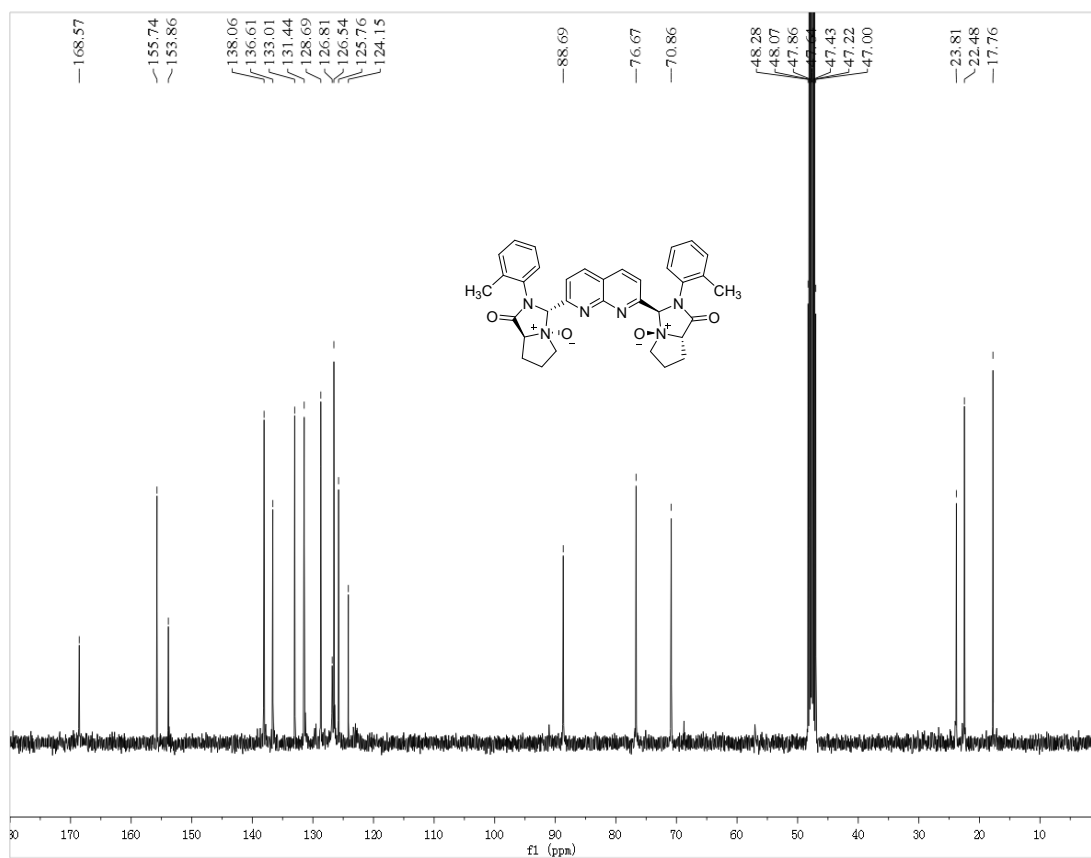

**<sup>1</sup>H and <sup>13</sup>C NMR of L1i**

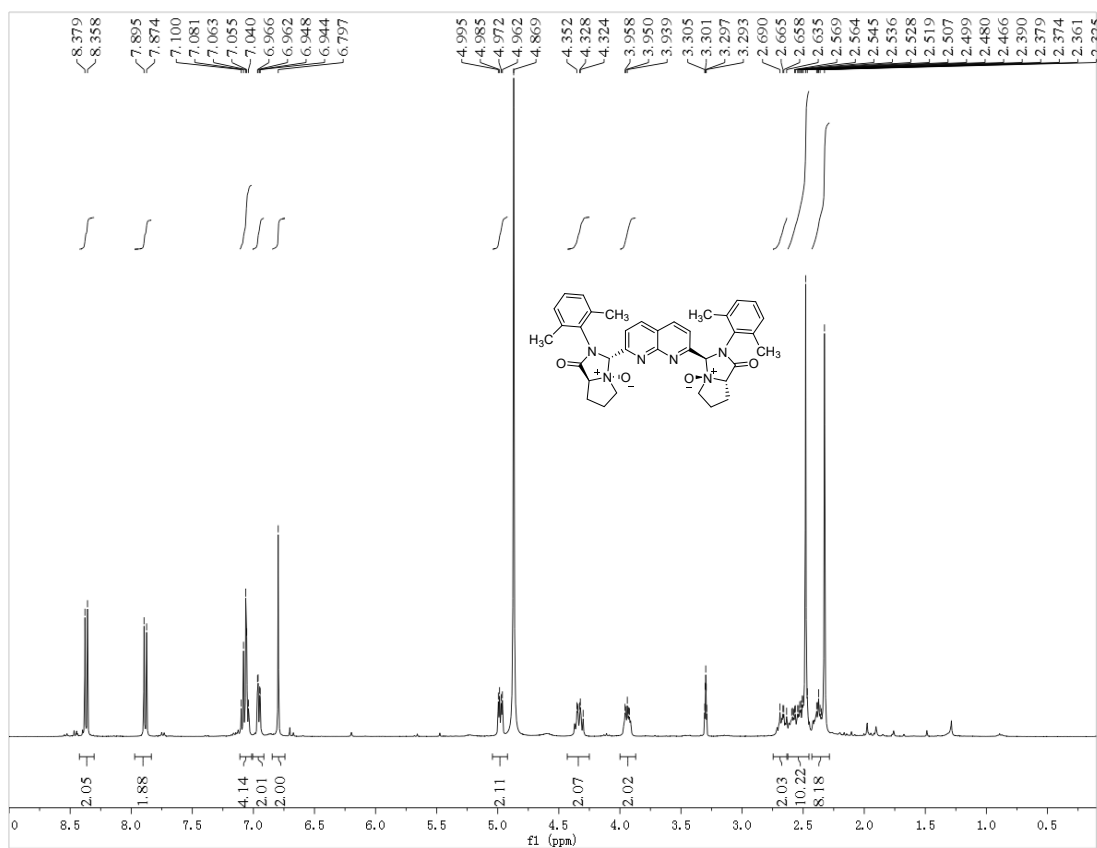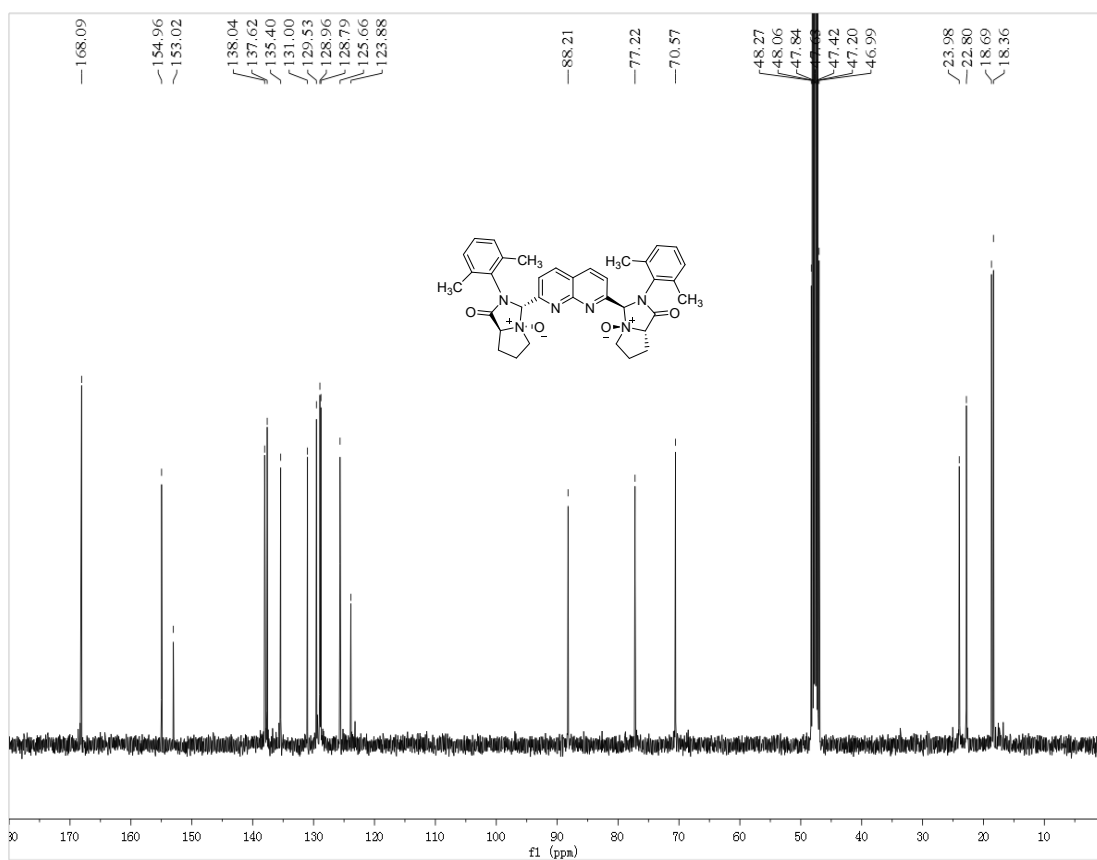

**<sup>1</sup>H and <sup>13</sup>C NMR of L1j**

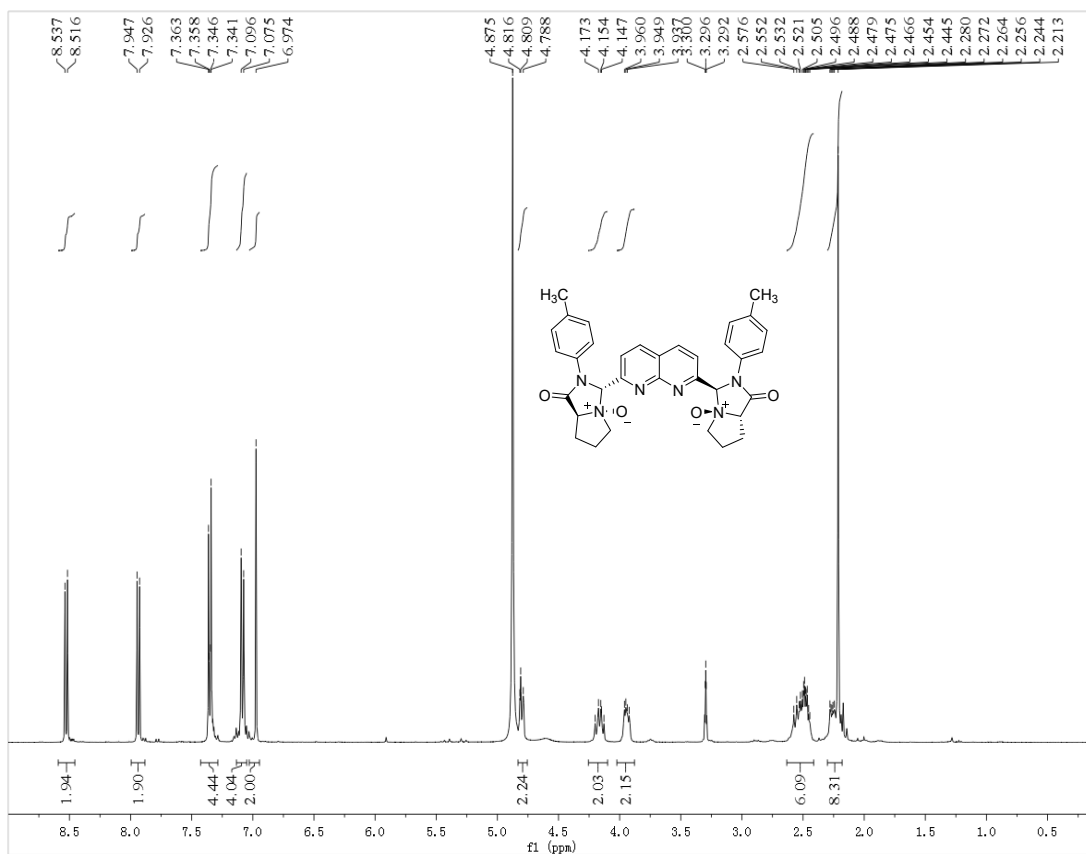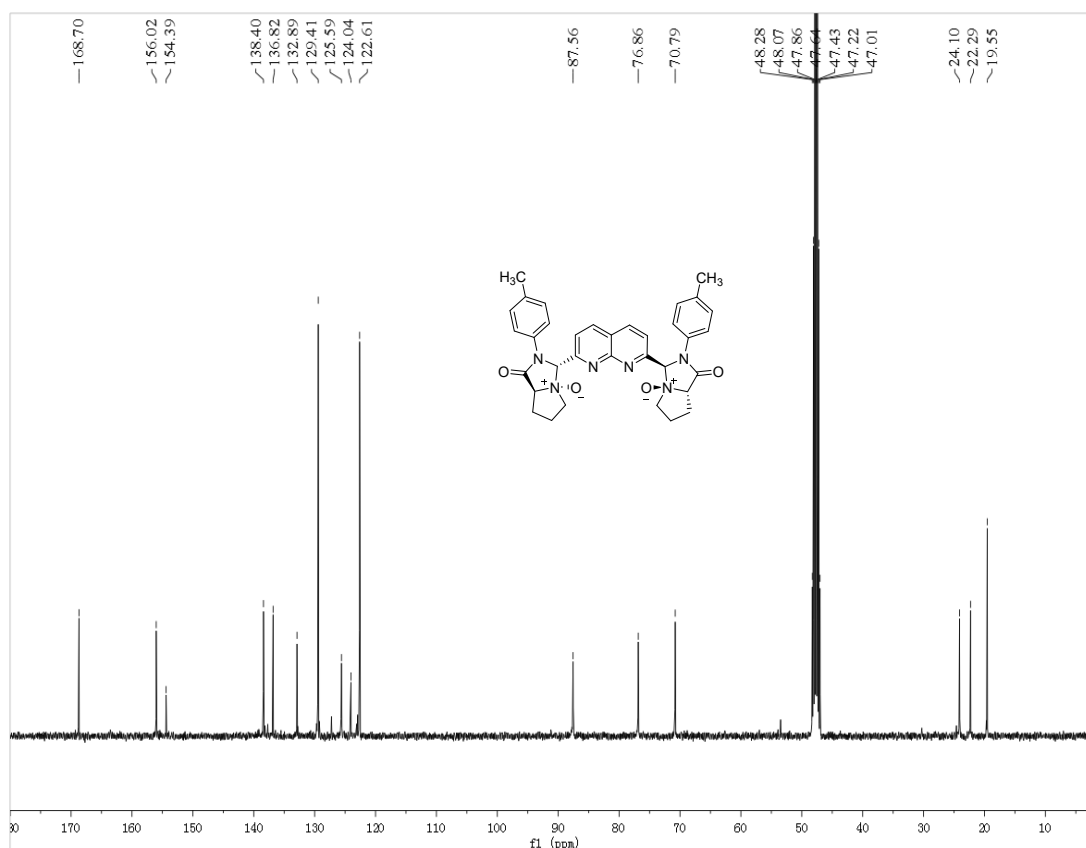

**<sup>1</sup>H and <sup>13</sup>C NMR of L1k**

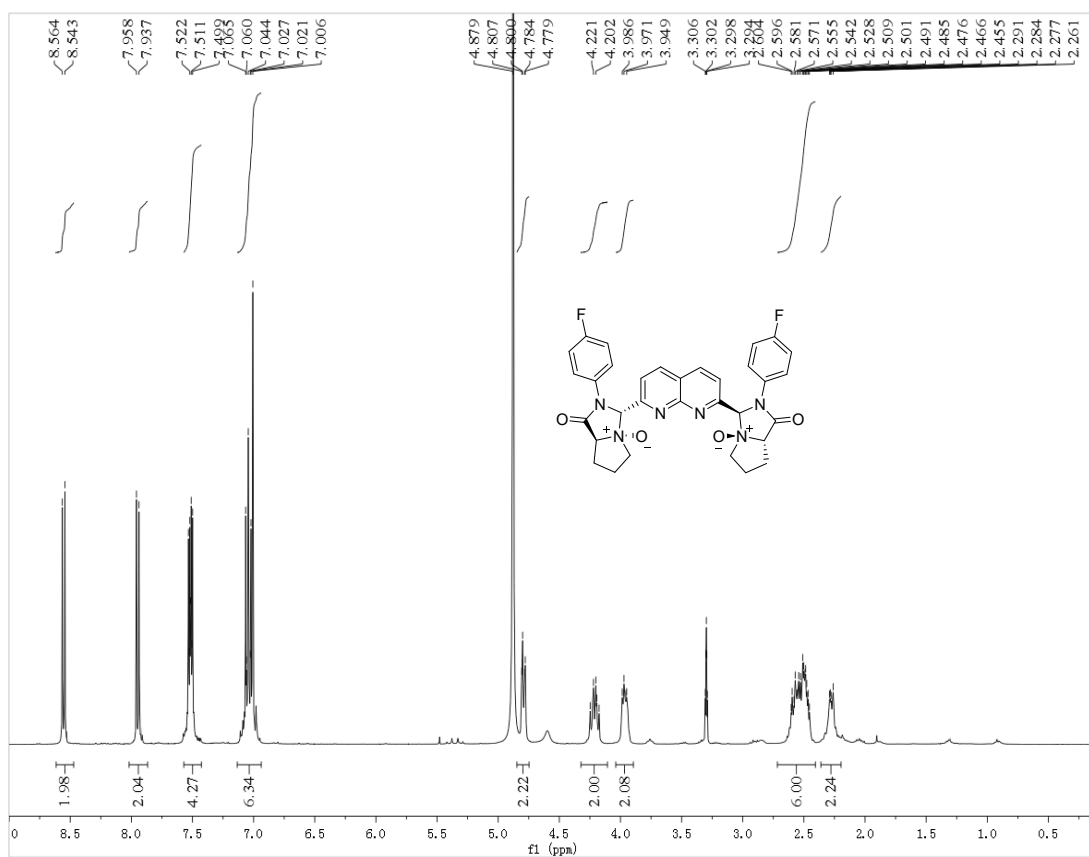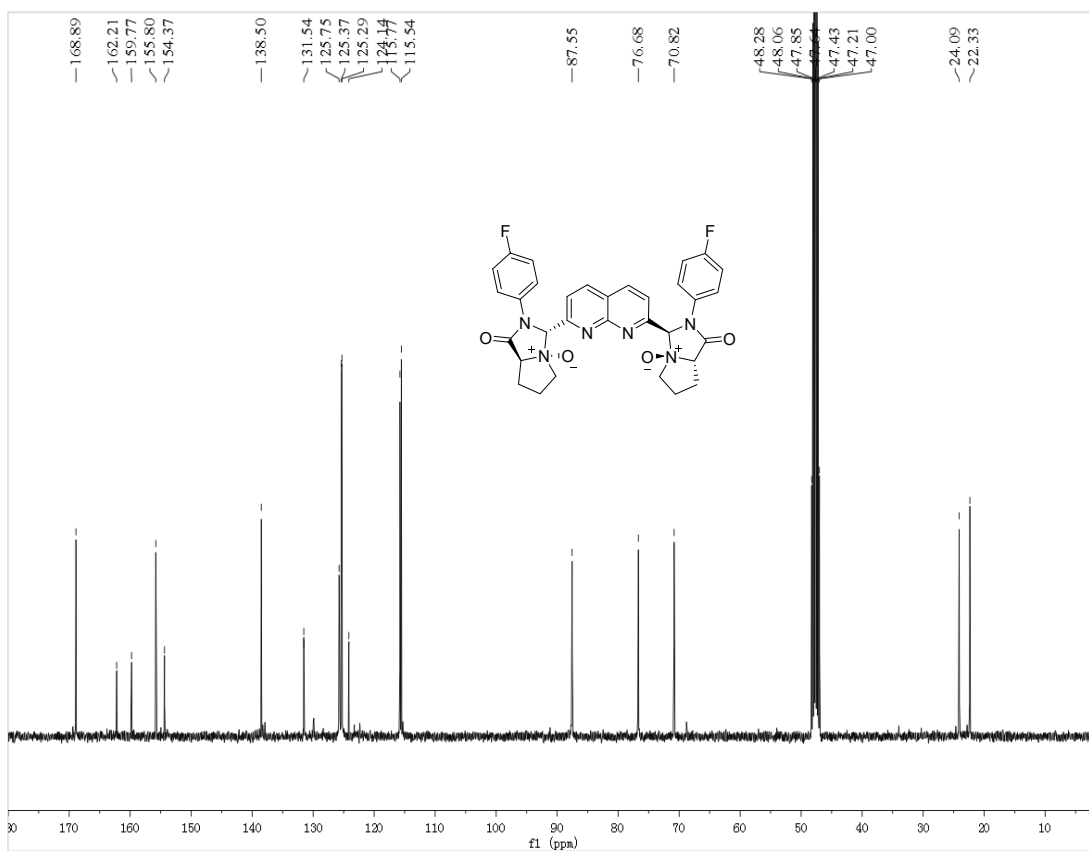

**<sup>1</sup>H and <sup>13</sup>C NMR of L11**

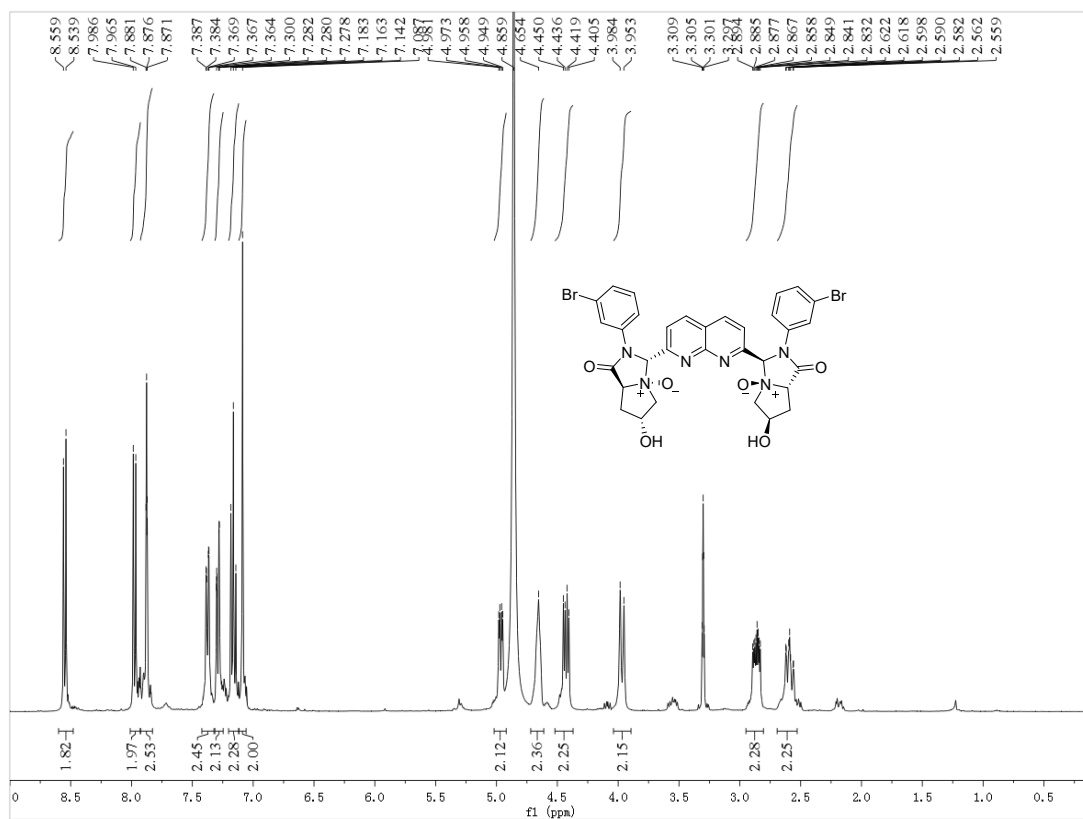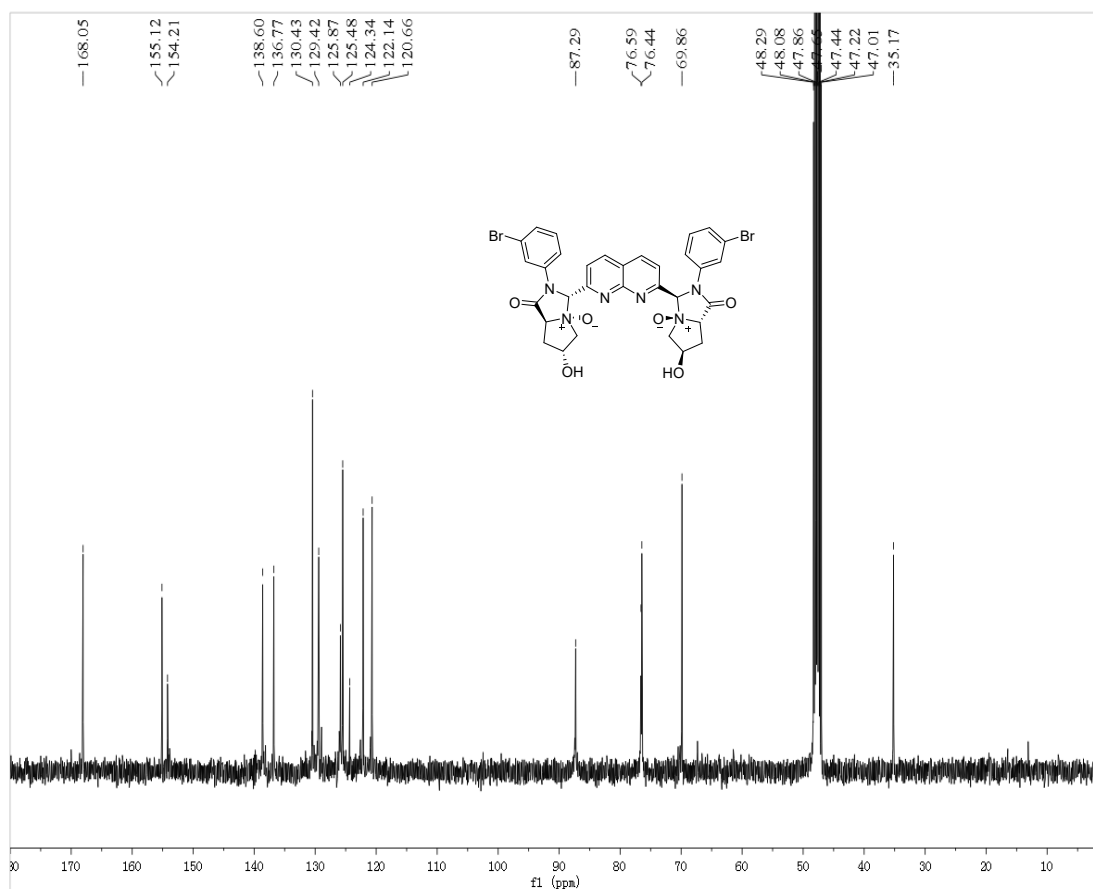

**<sup>1</sup>H and <sup>13</sup>C NMR of L1m**

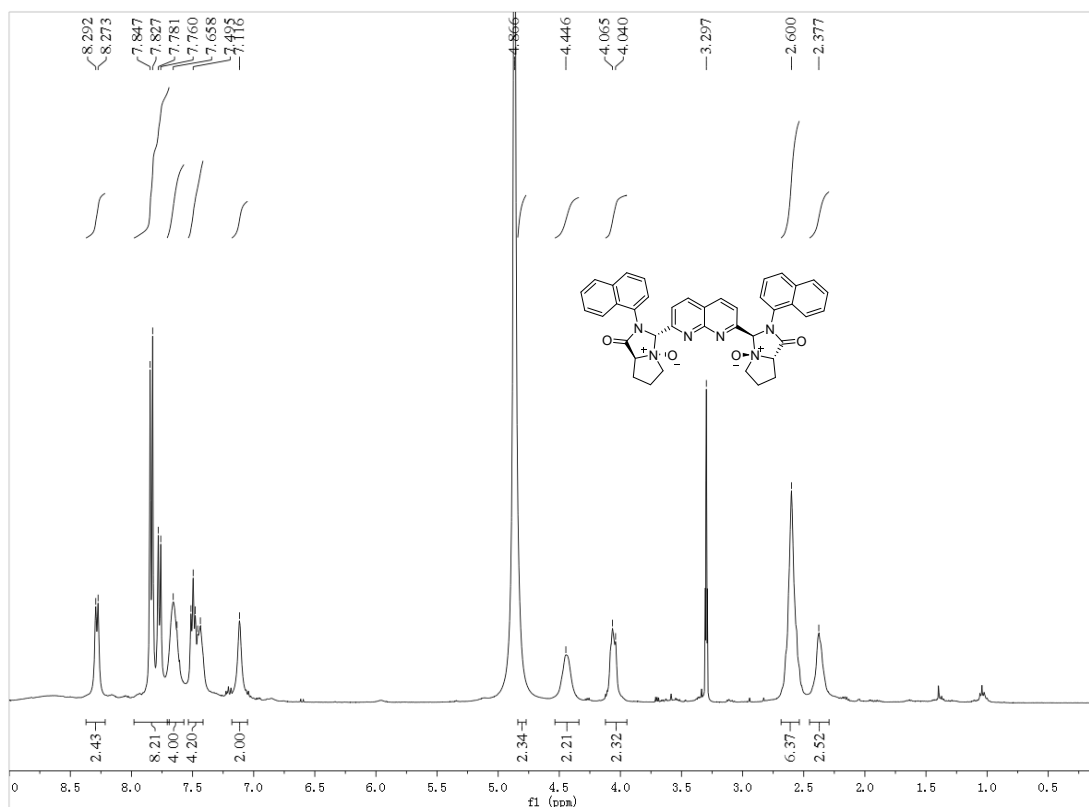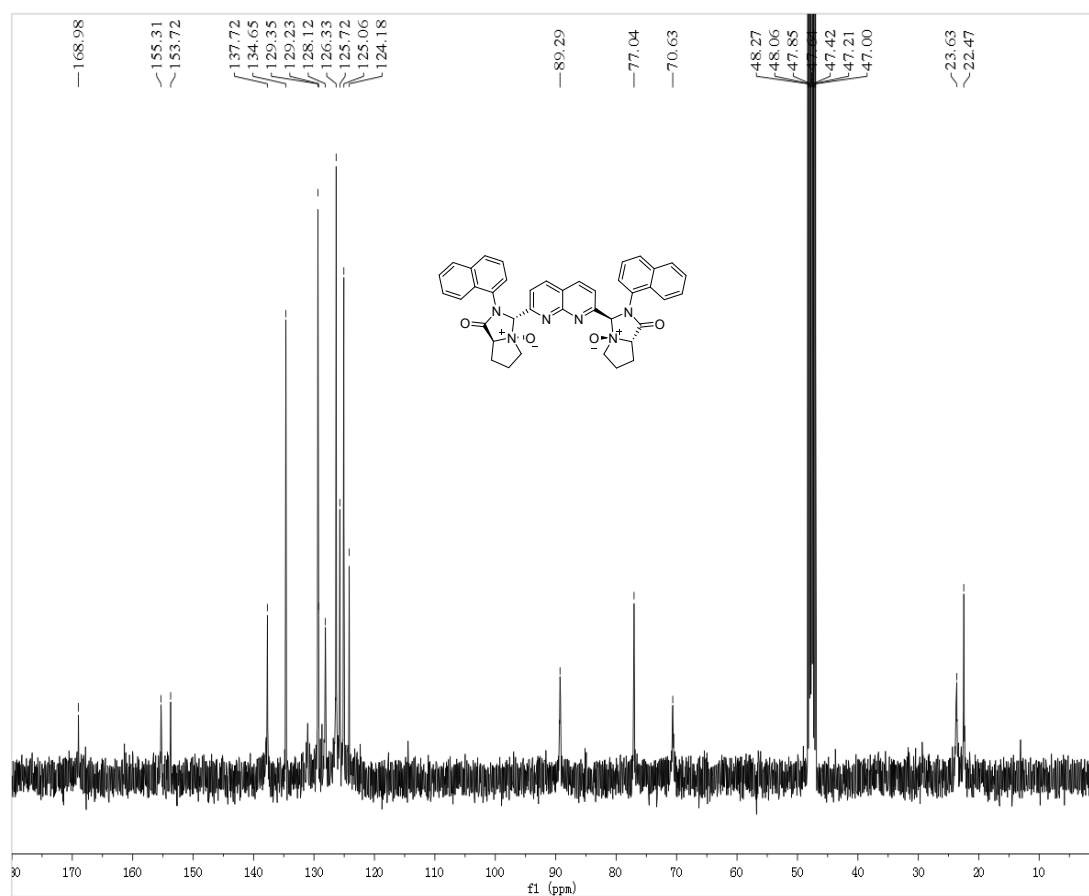

**<sup>1</sup>H and <sup>13</sup>C NMR of L2a**

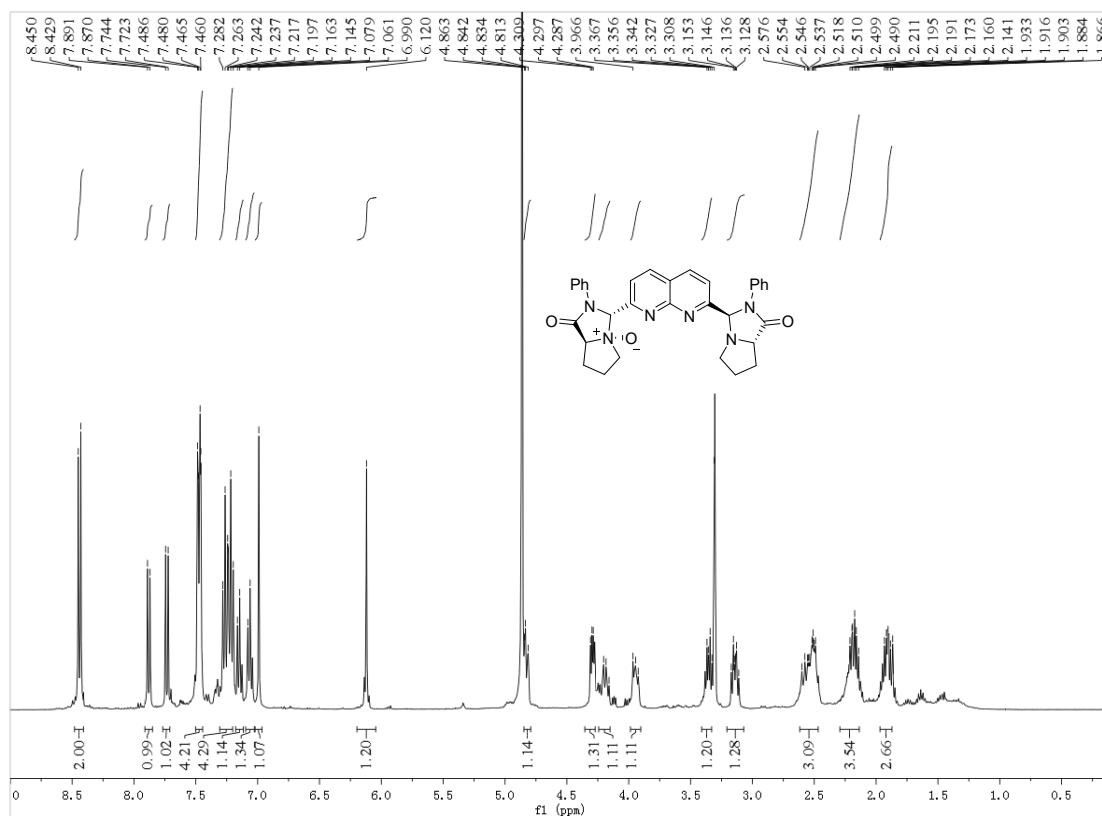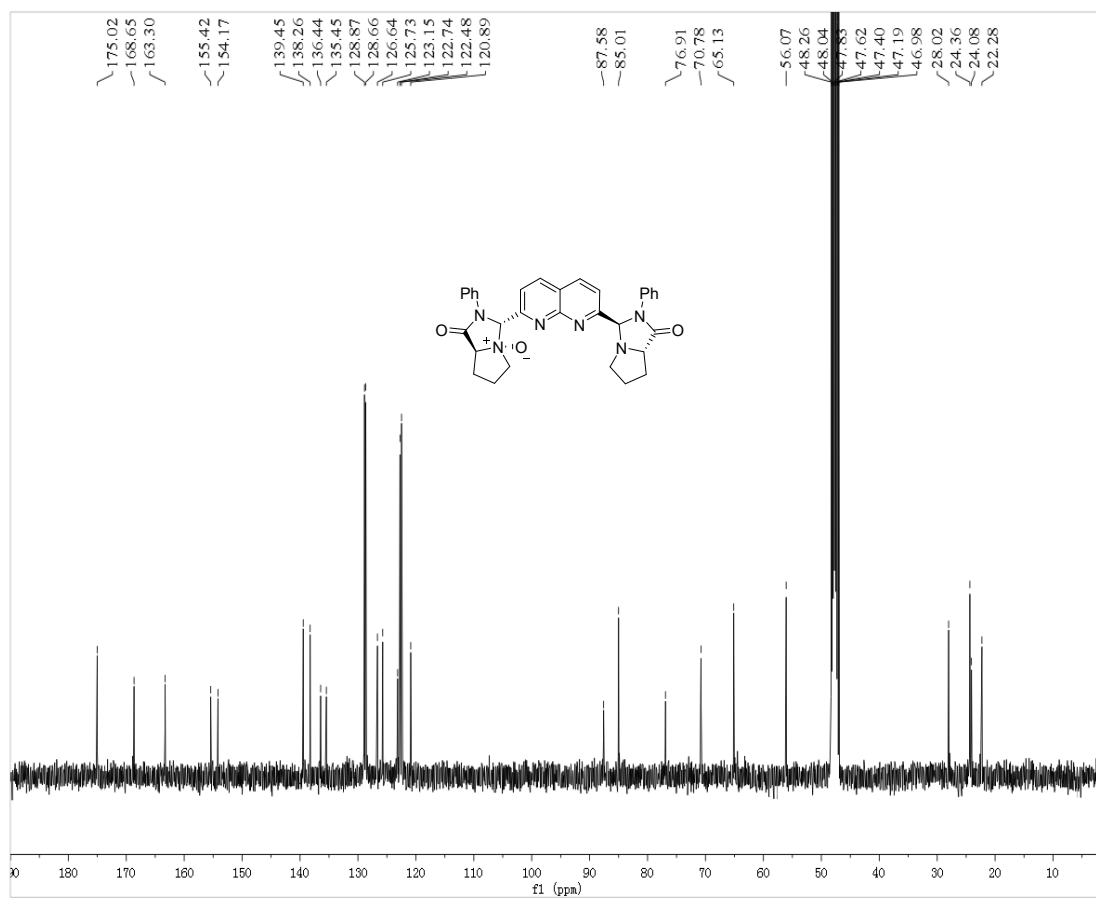

**<sup>1</sup>H and <sup>13</sup>C NMR of L3a**

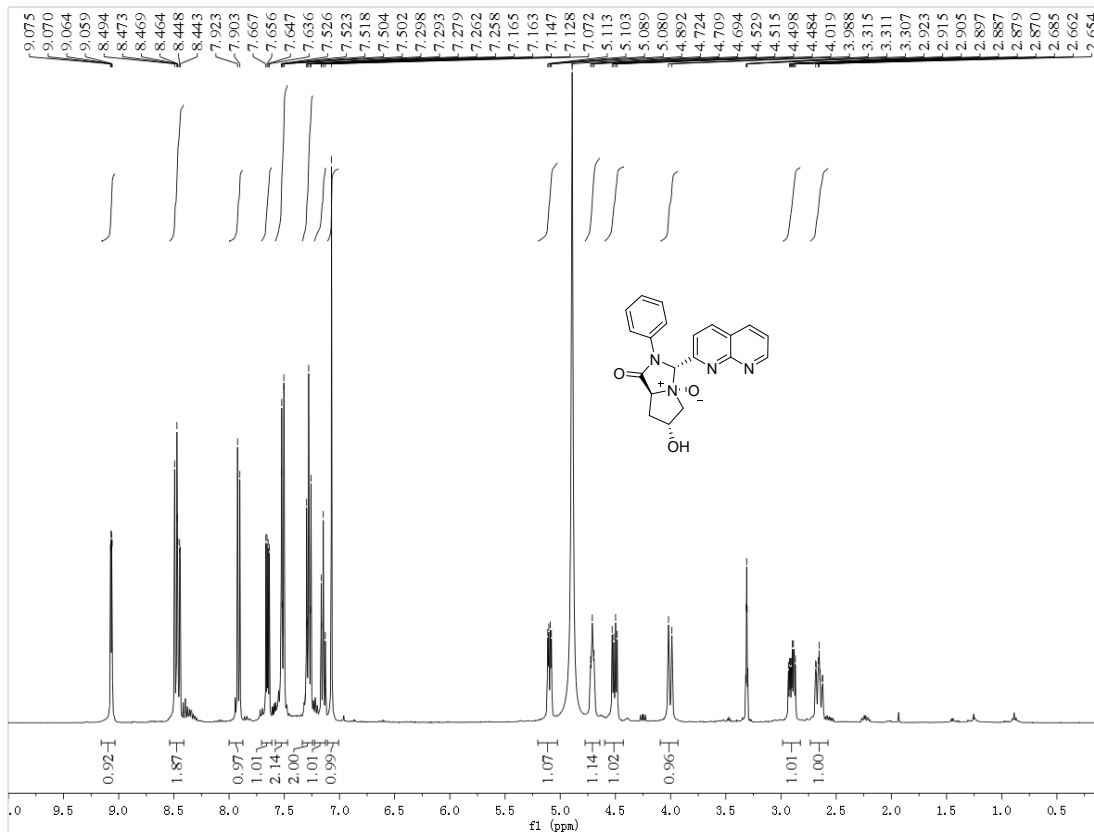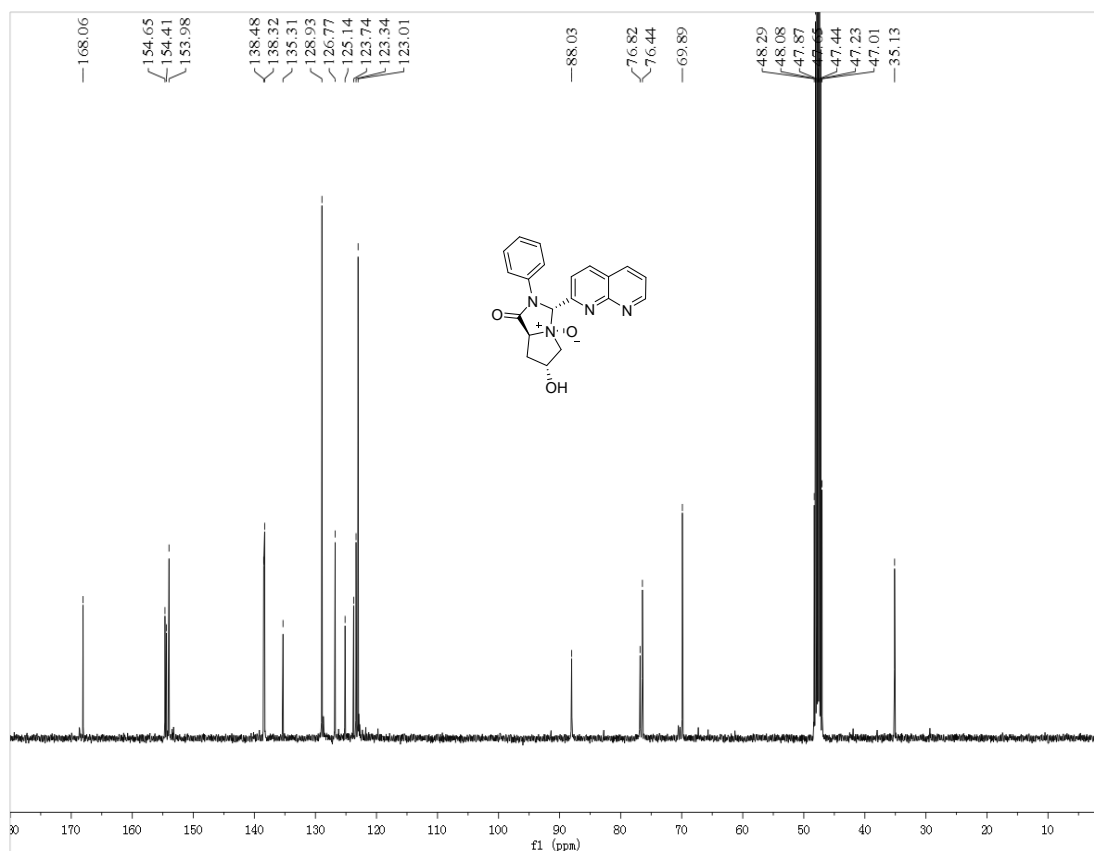

**<sup>1</sup>H and <sup>13</sup>C NMR of L4a**



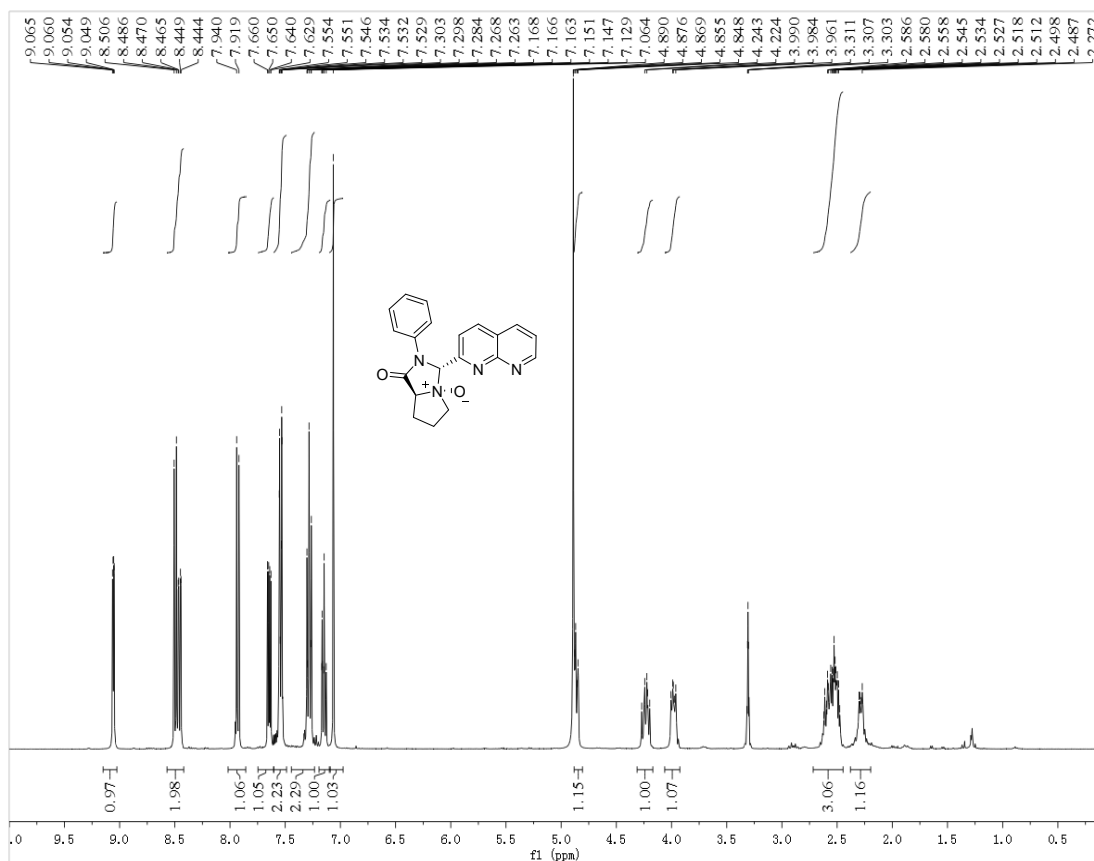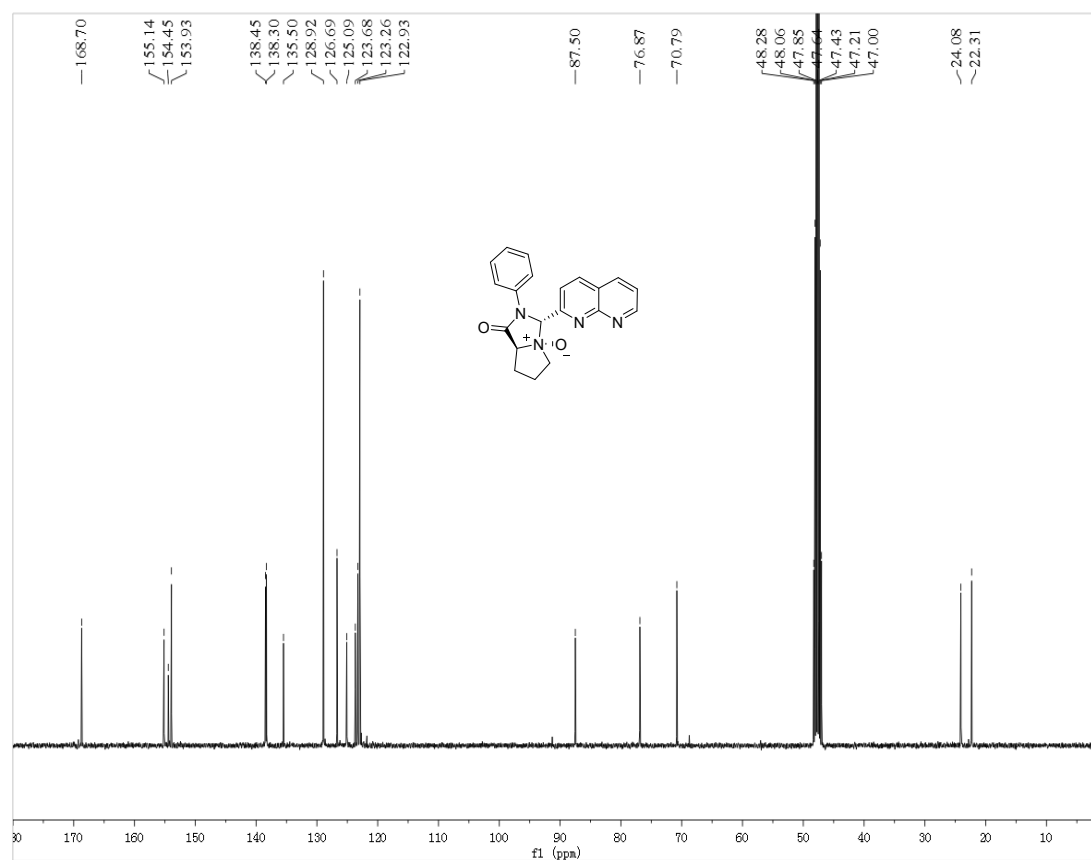

**<sup>1</sup>H and <sup>13</sup>C NMR of L7a**

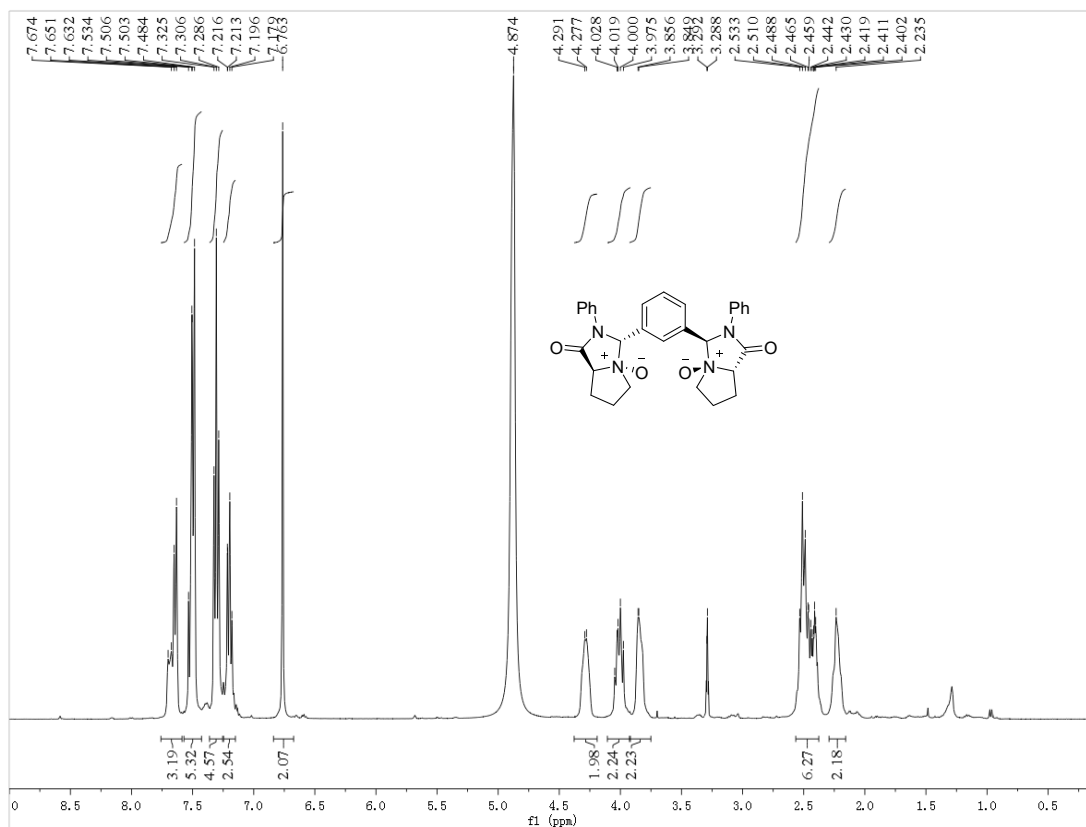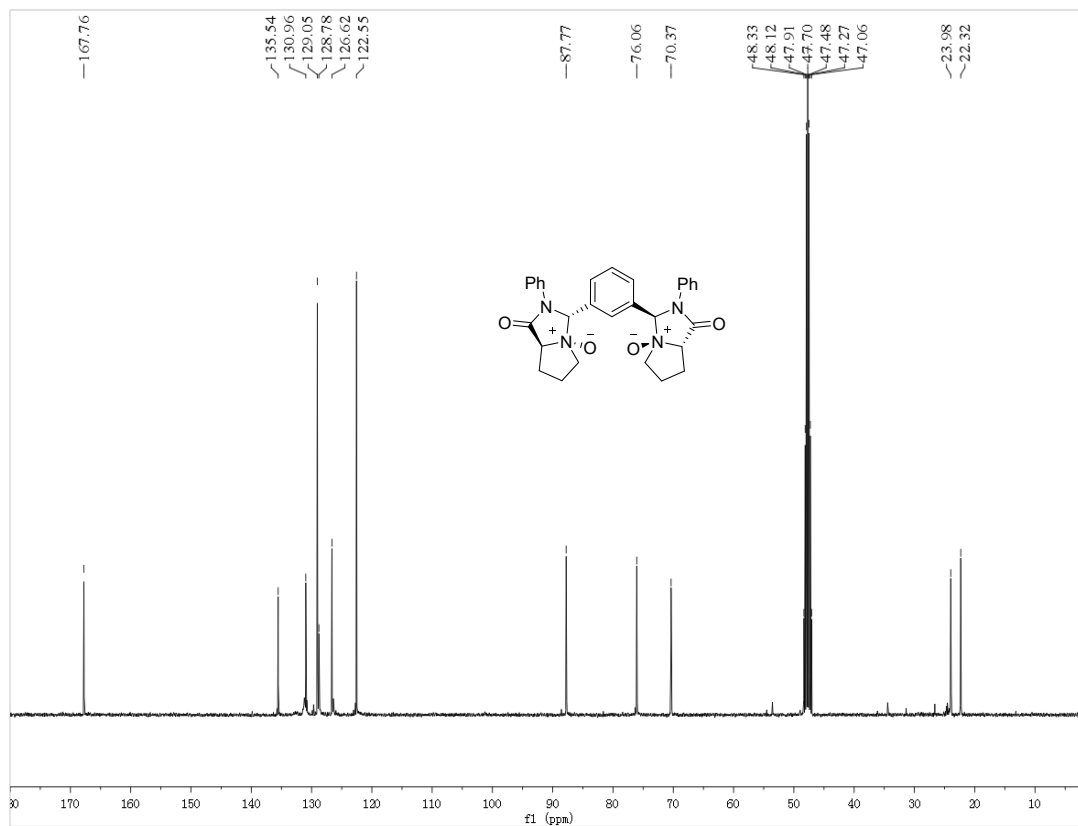

**<sup>1</sup>H and <sup>13</sup>C NMR of 6a**

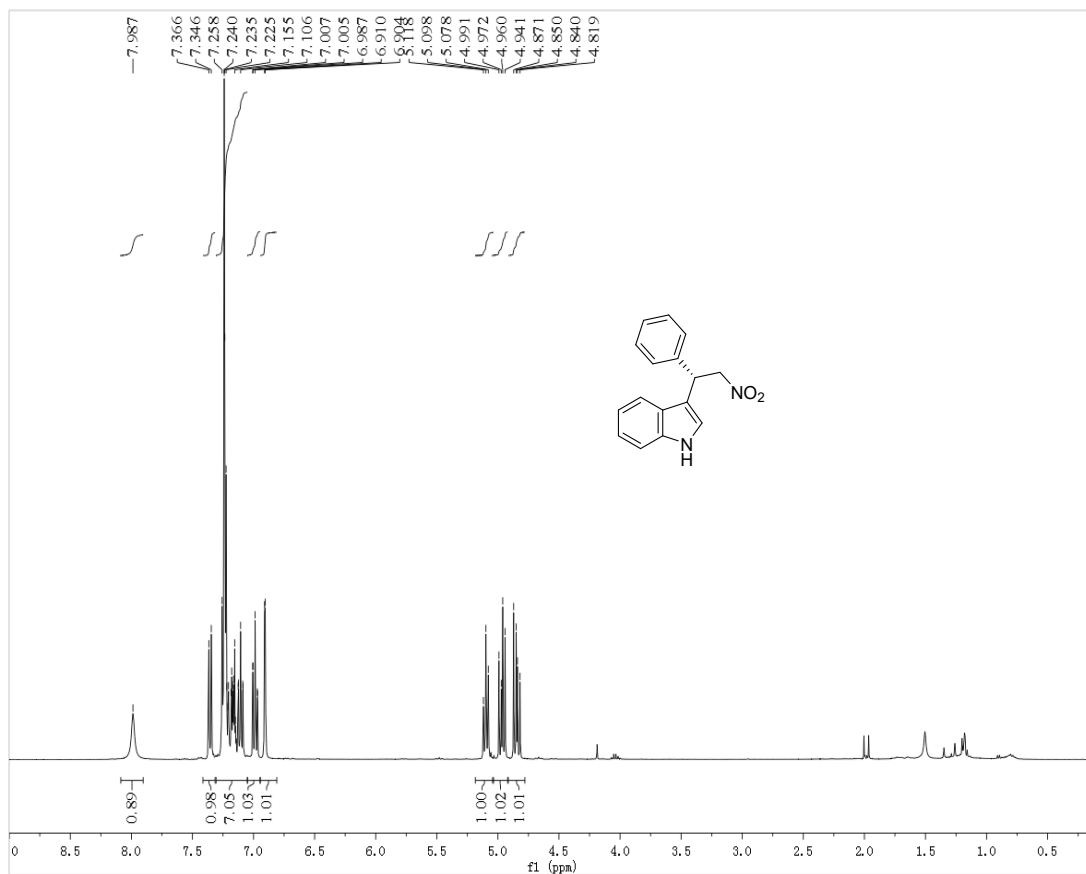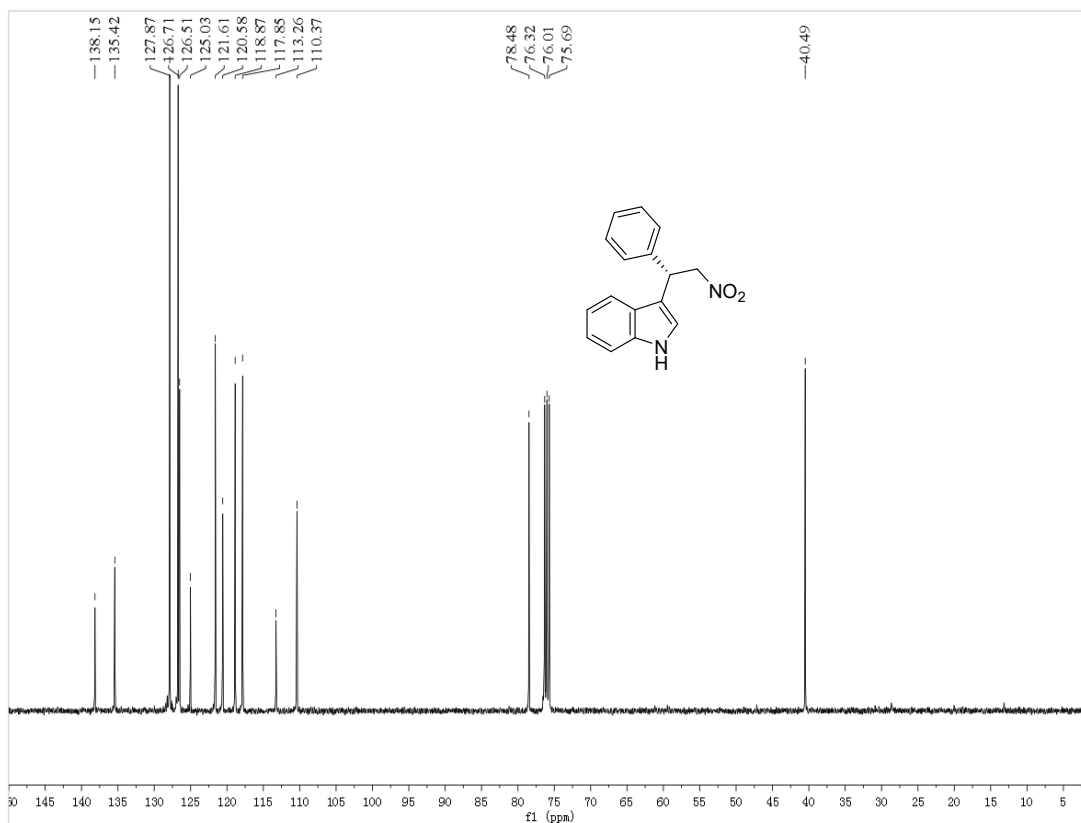

HPLC of 6a

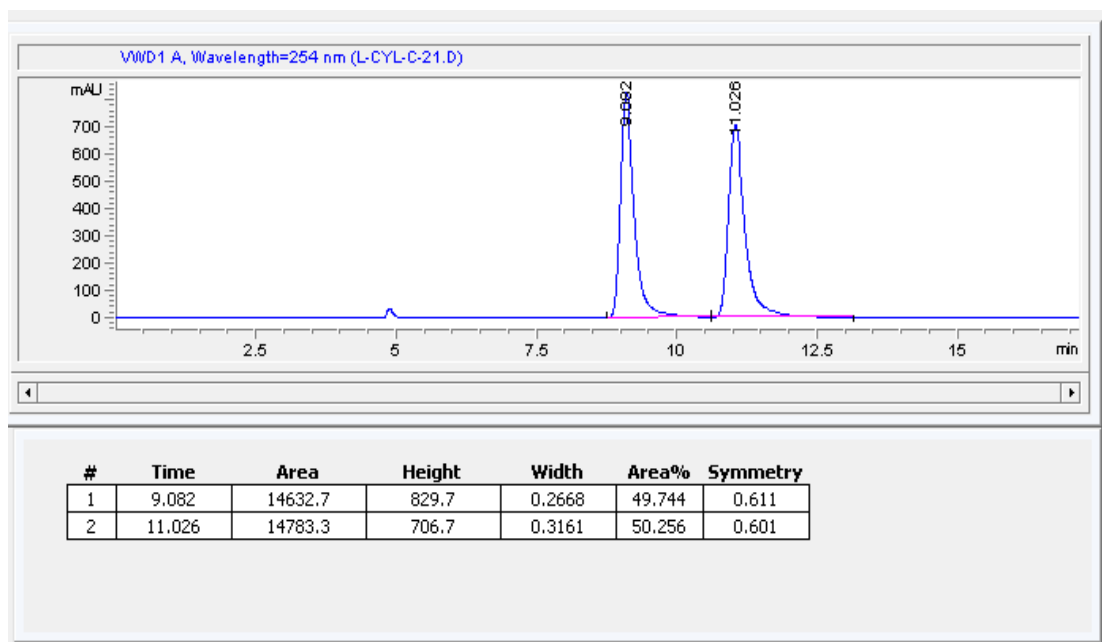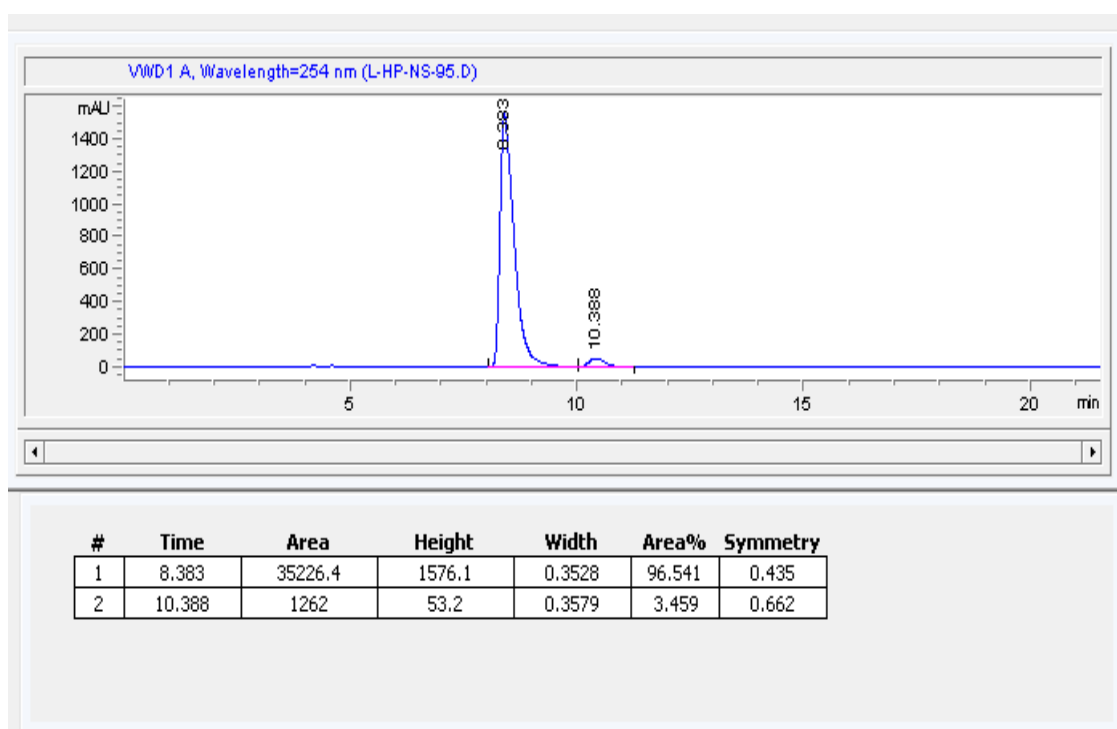

**<sup>1</sup>H and <sup>13</sup>C NMR of 6b**

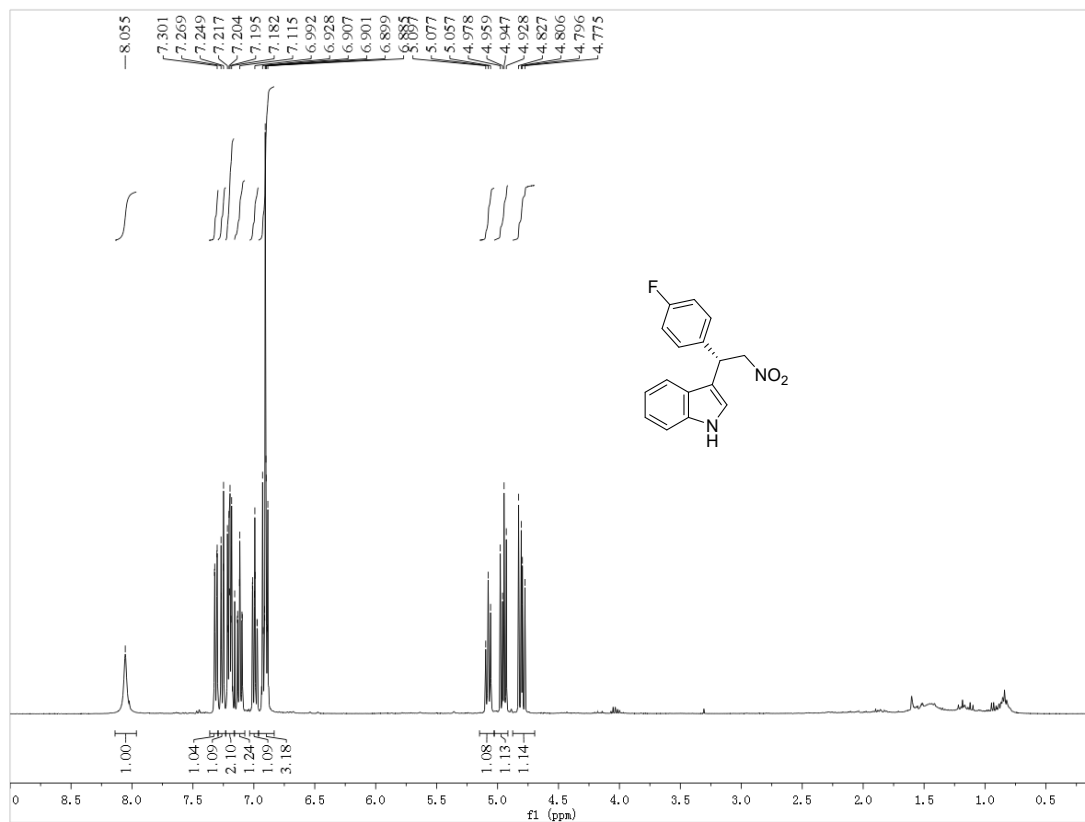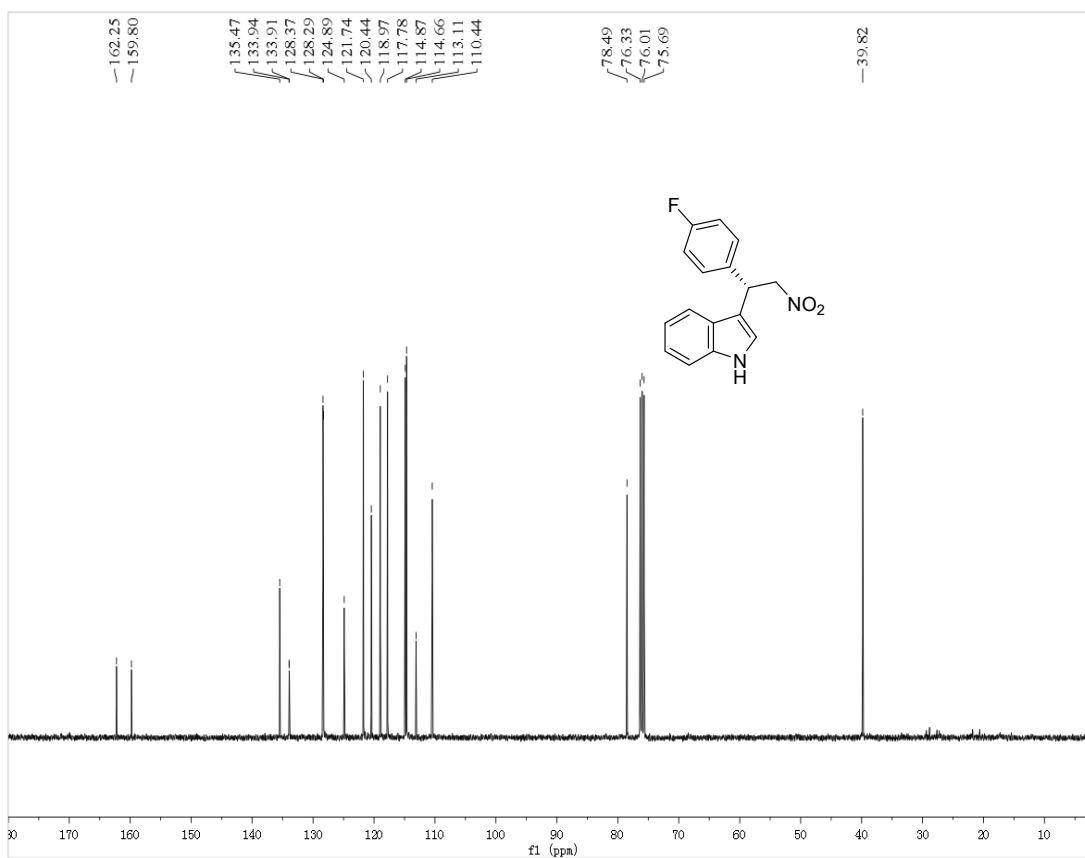

HPLC of 6b

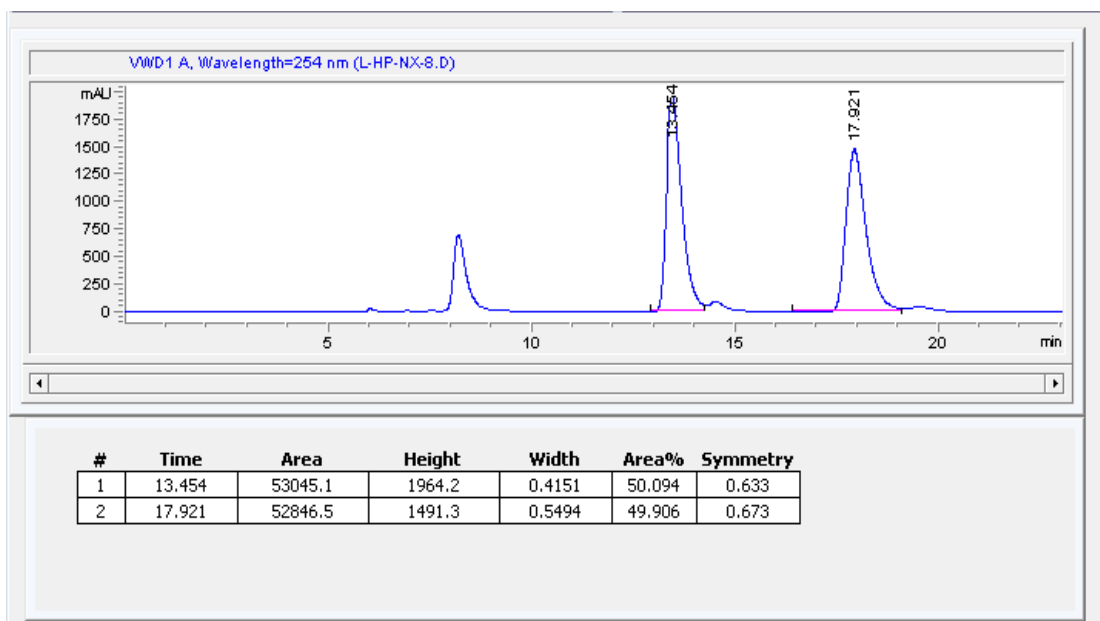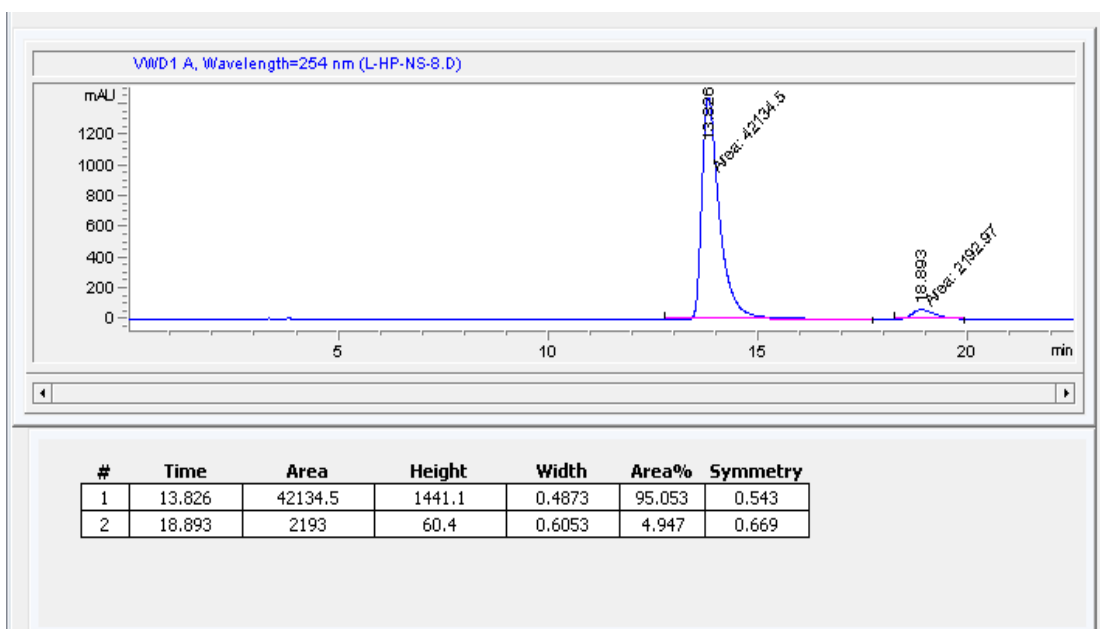

**<sup>1</sup>H and <sup>13</sup>C NMR of 6c**

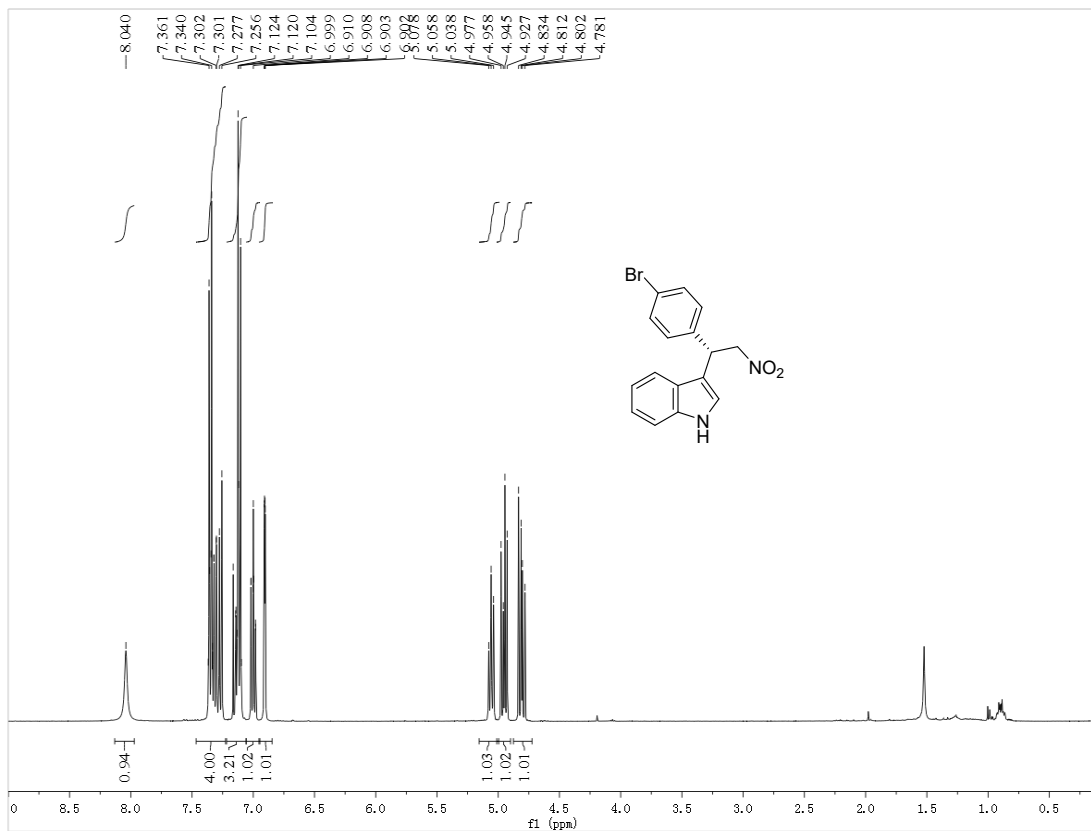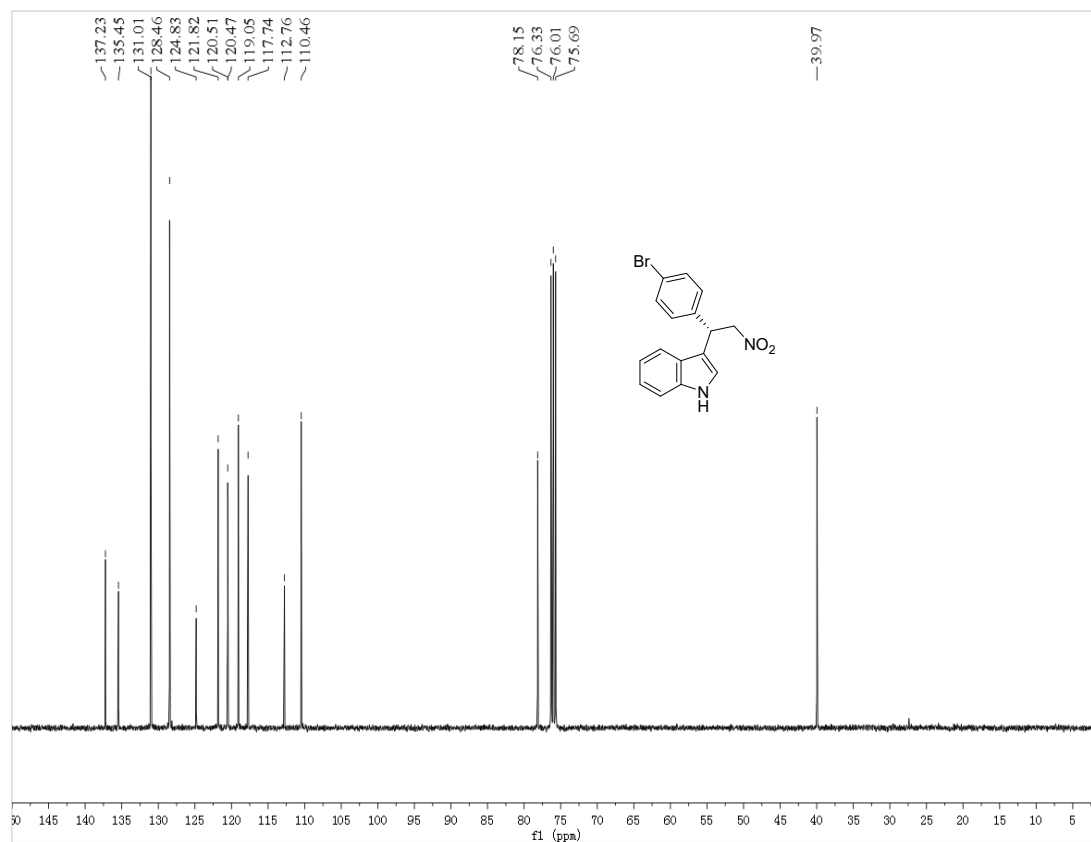

HPLC of 6c

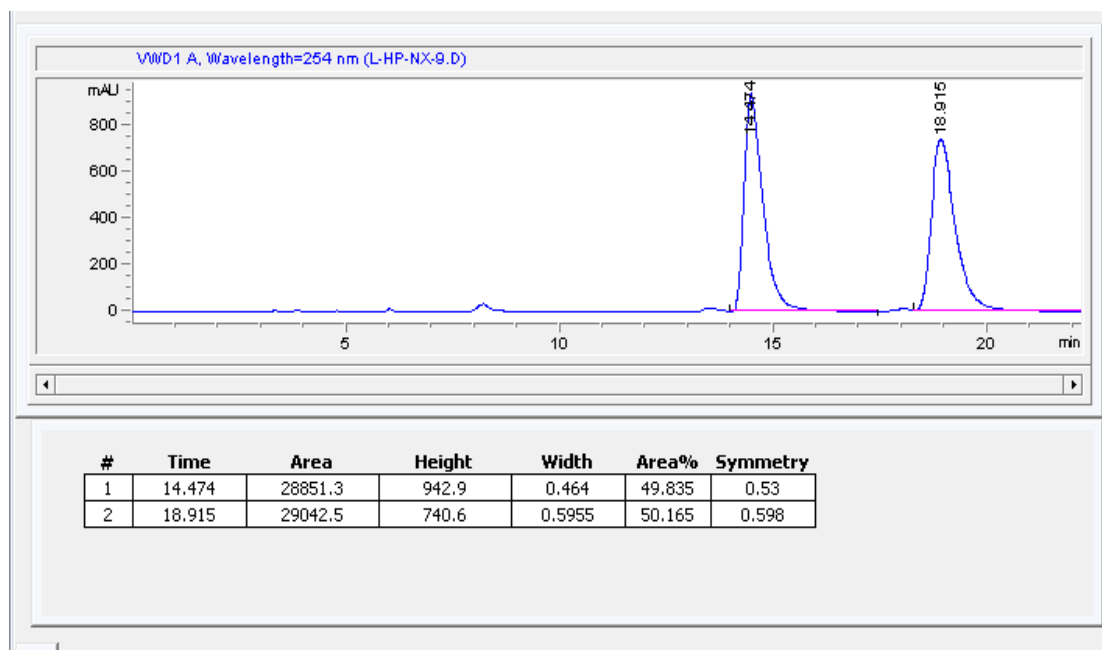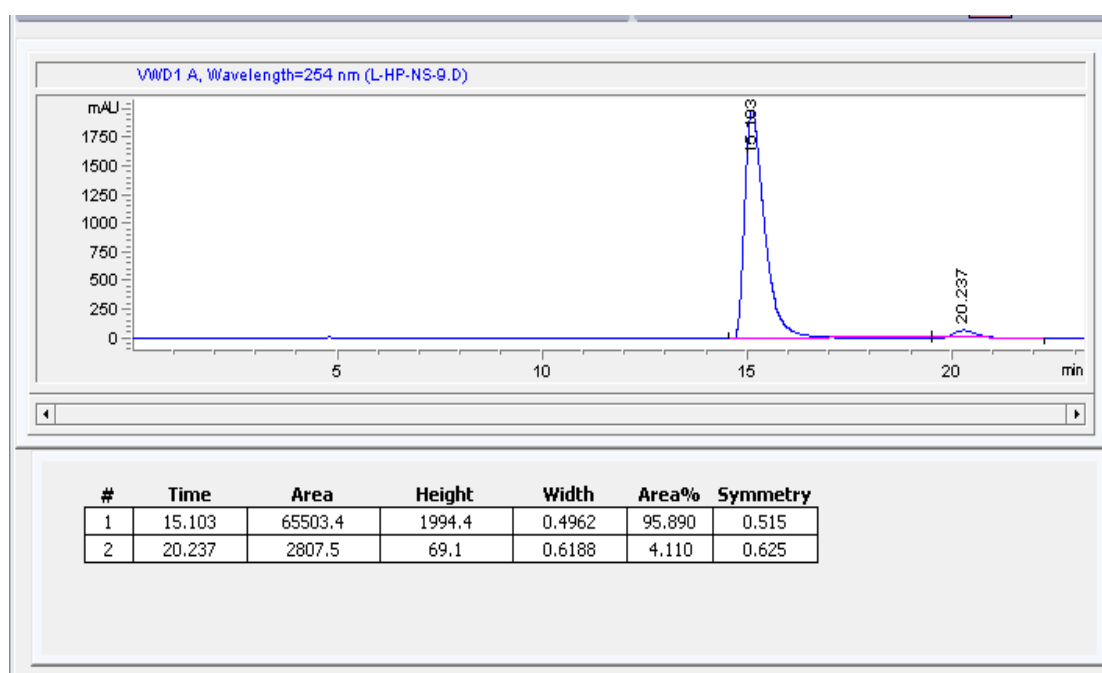

**$^1\text{H}$  and  $^{13}\text{C}$  NMR of 6d**



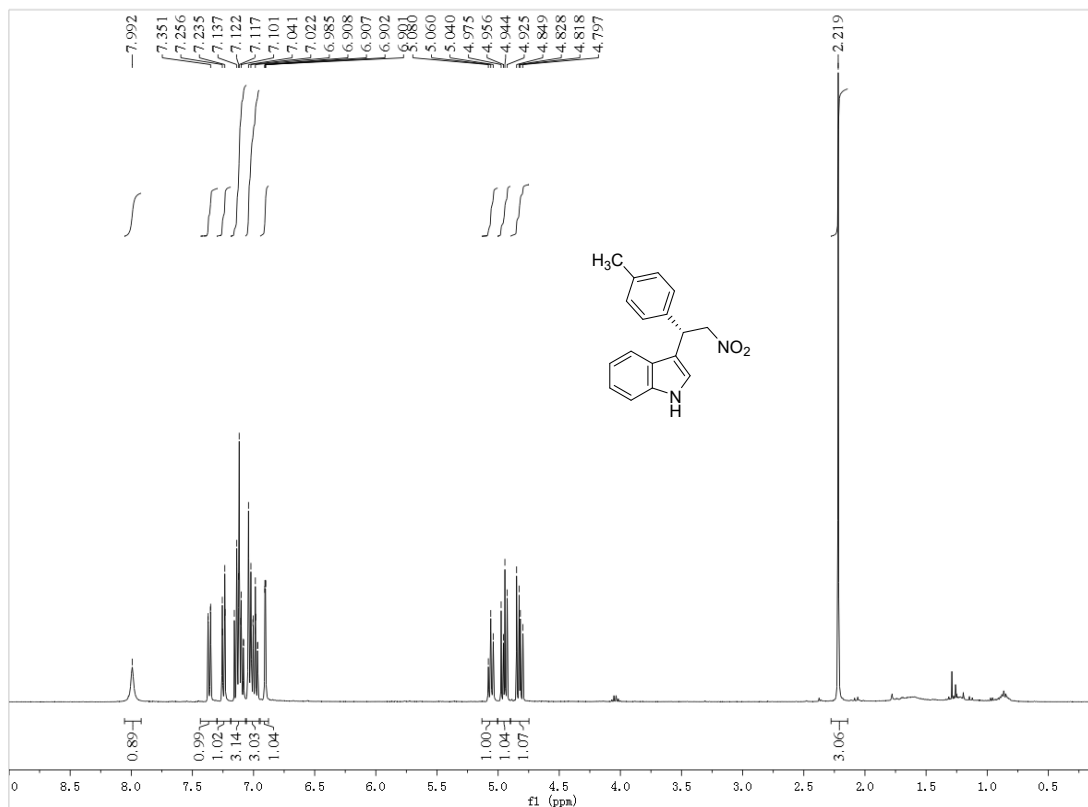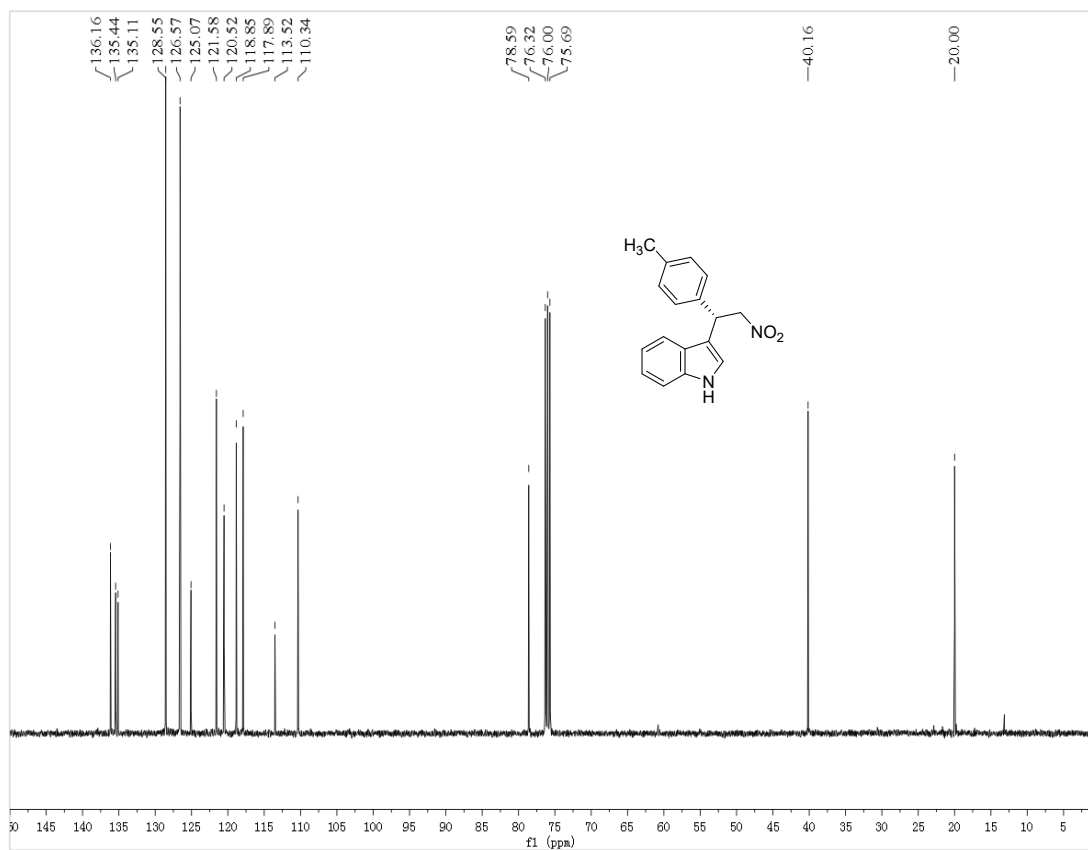

HPLC of 6d

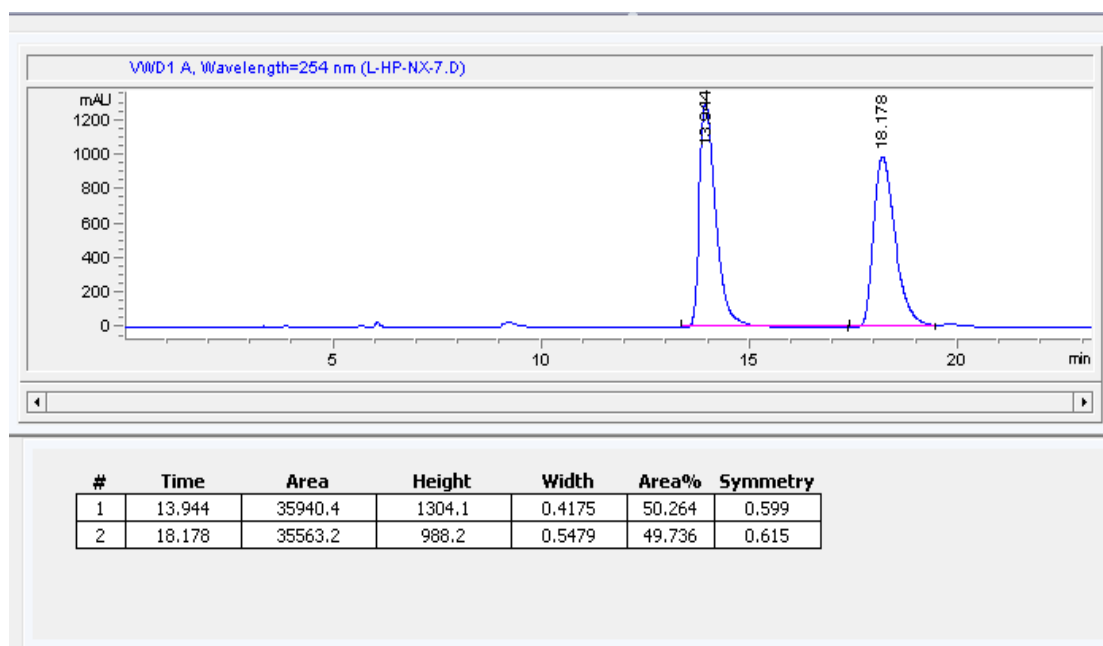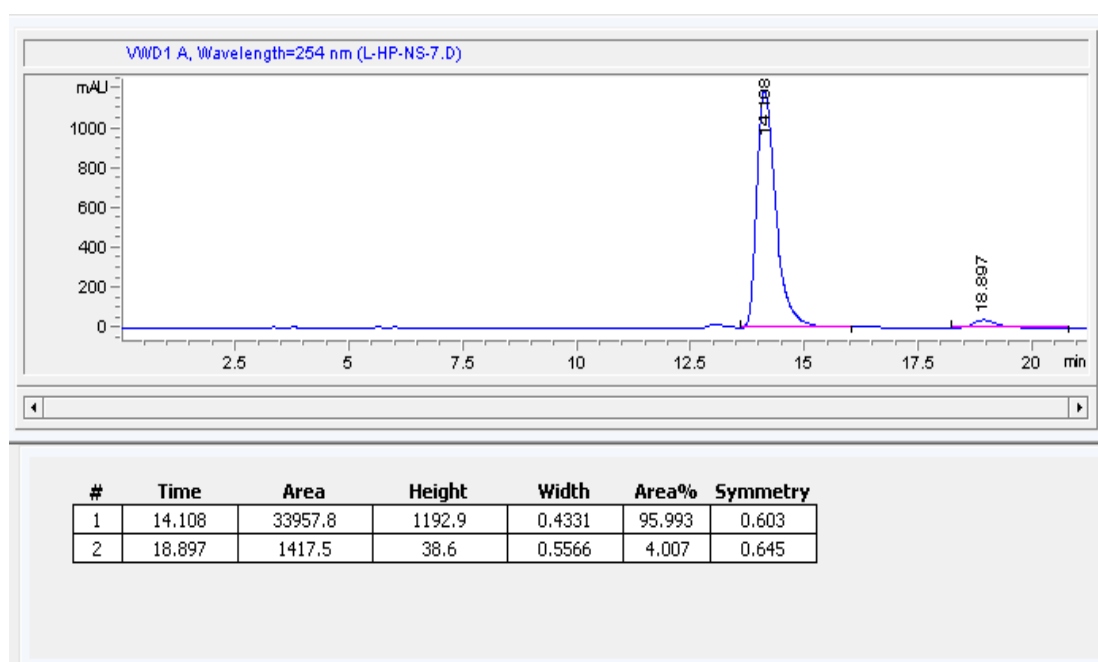

### $^1\text{H}$ and $^{13}\text{C}$ NMR of 6e

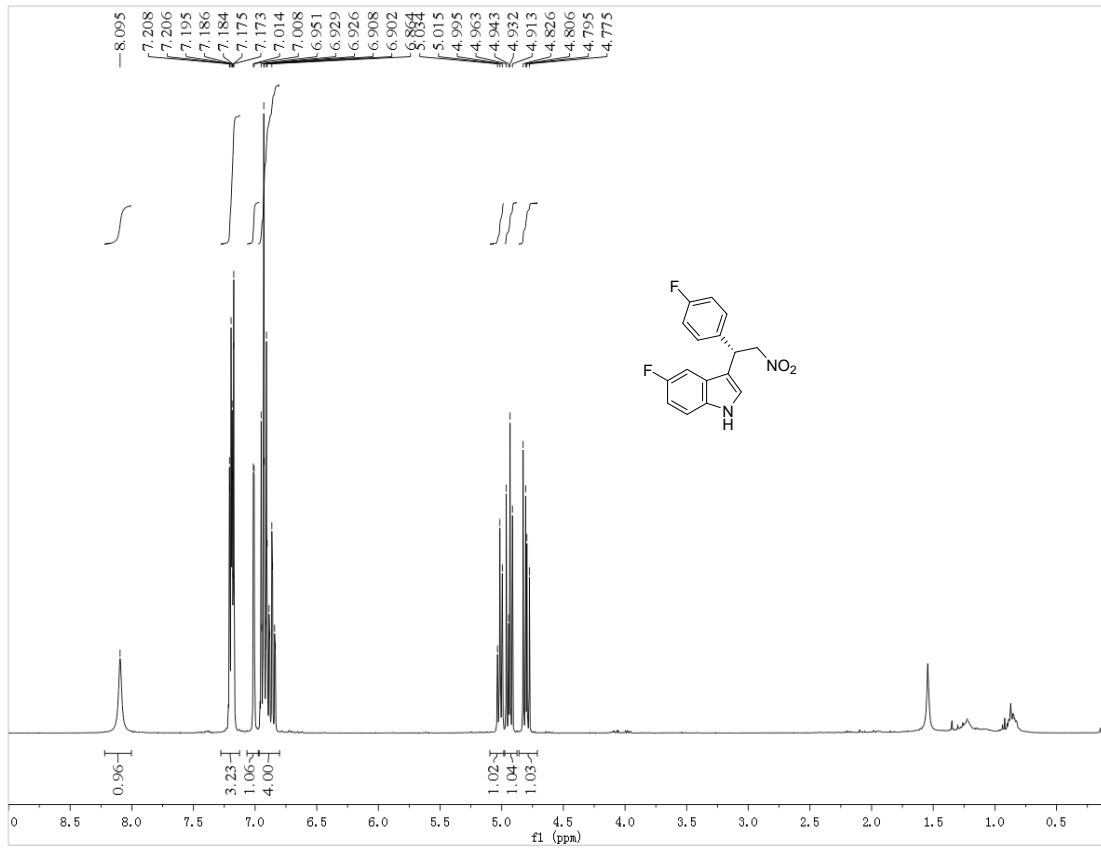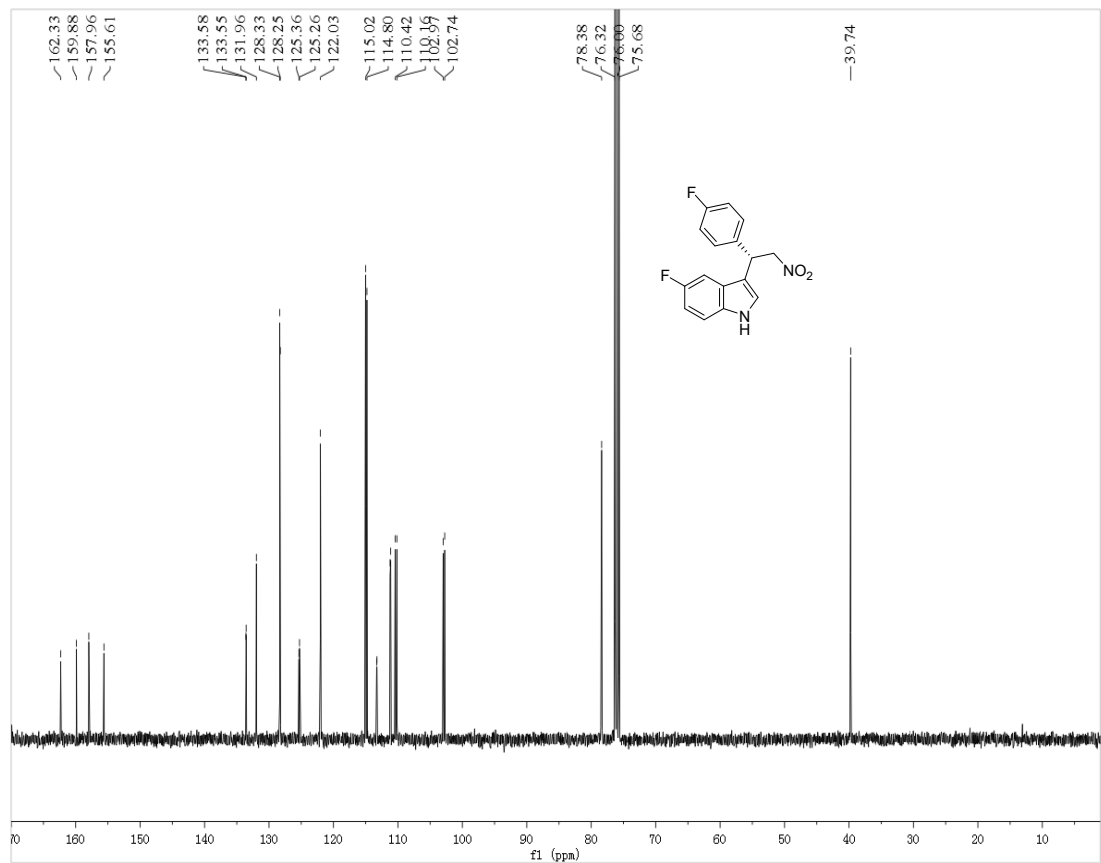

## HPLC of 6e

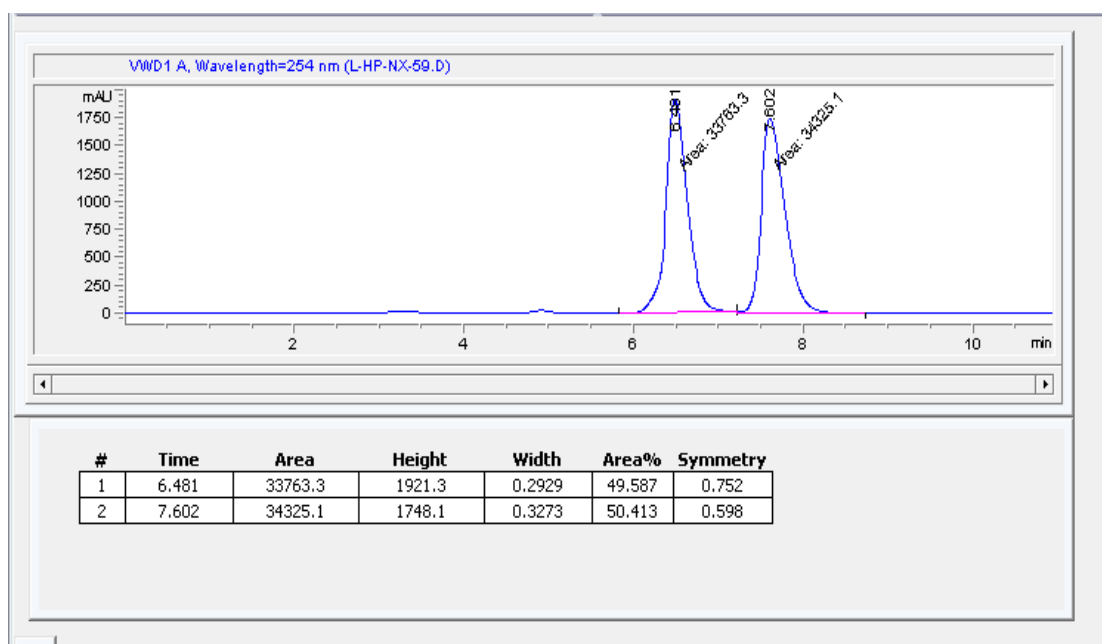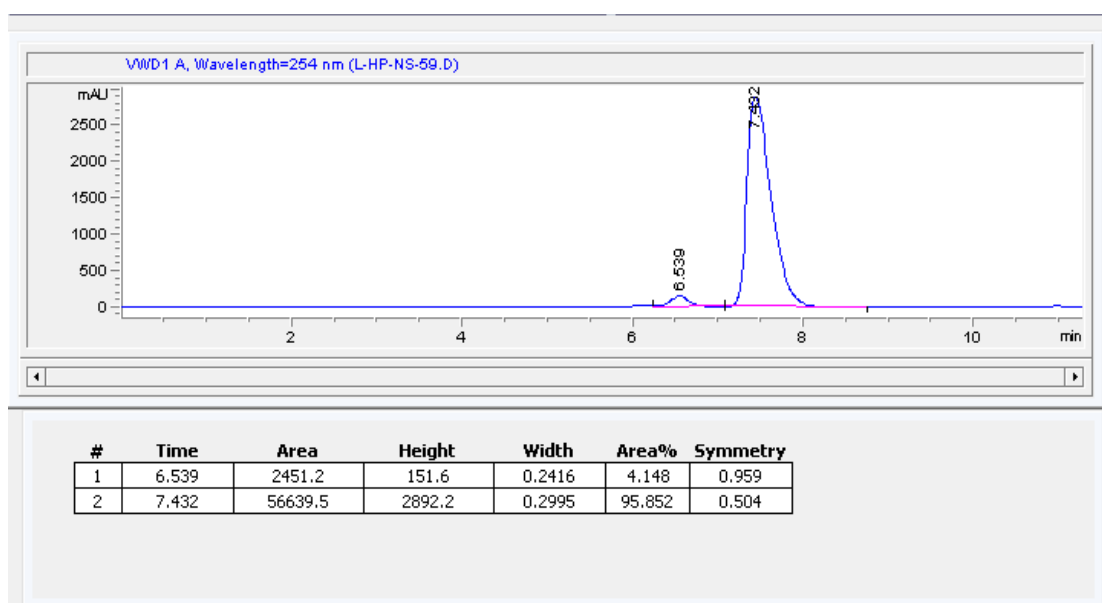

# <sup>1</sup>H and <sup>13</sup>C NMR of 6f

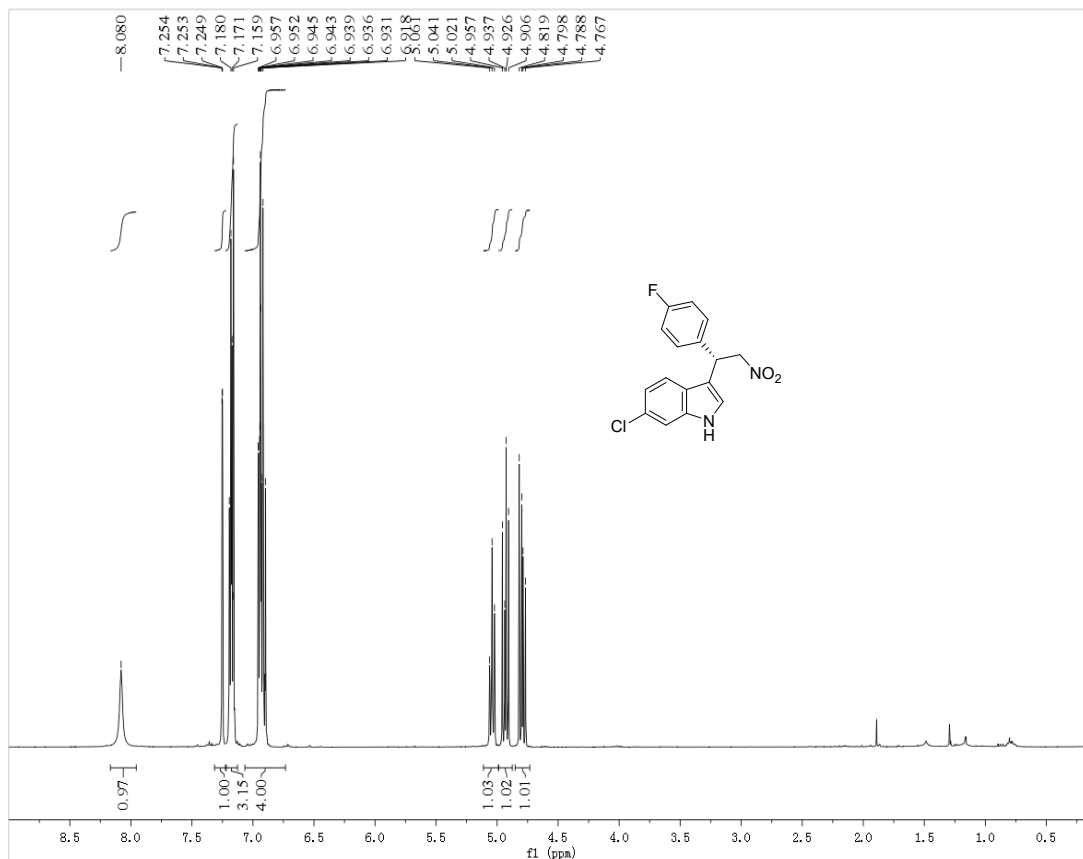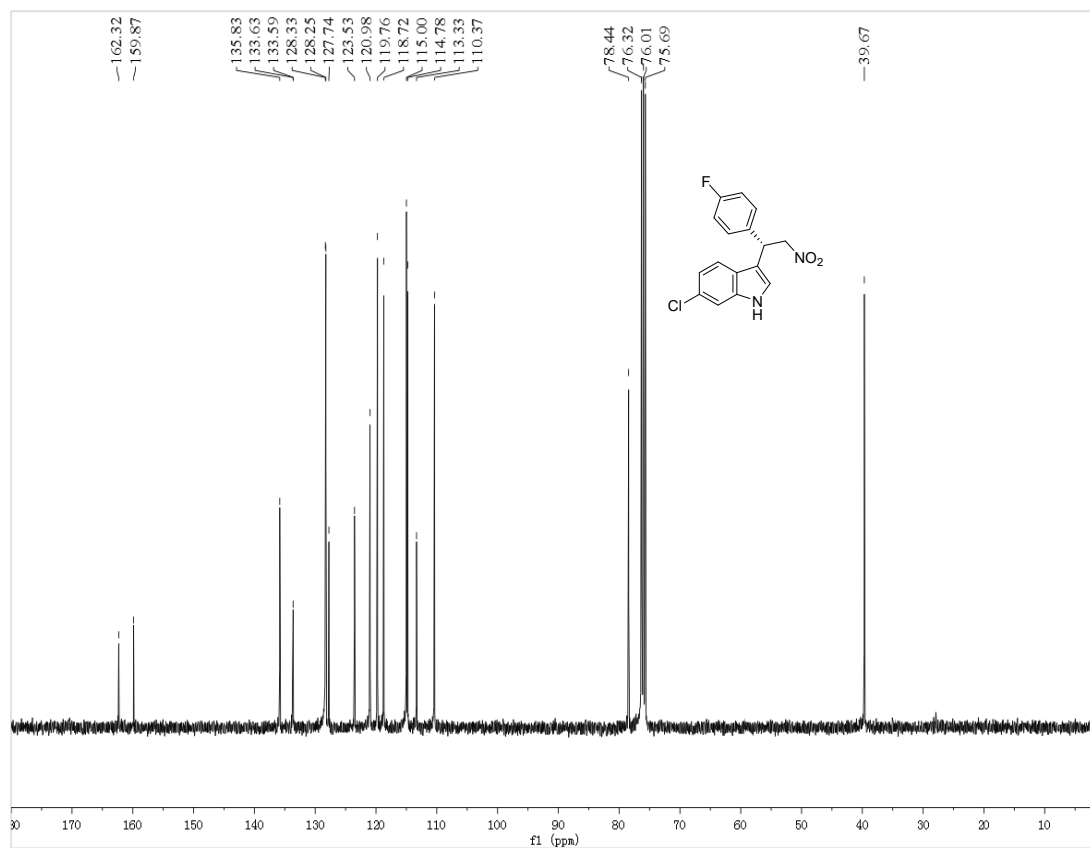

## HPLC of 6f

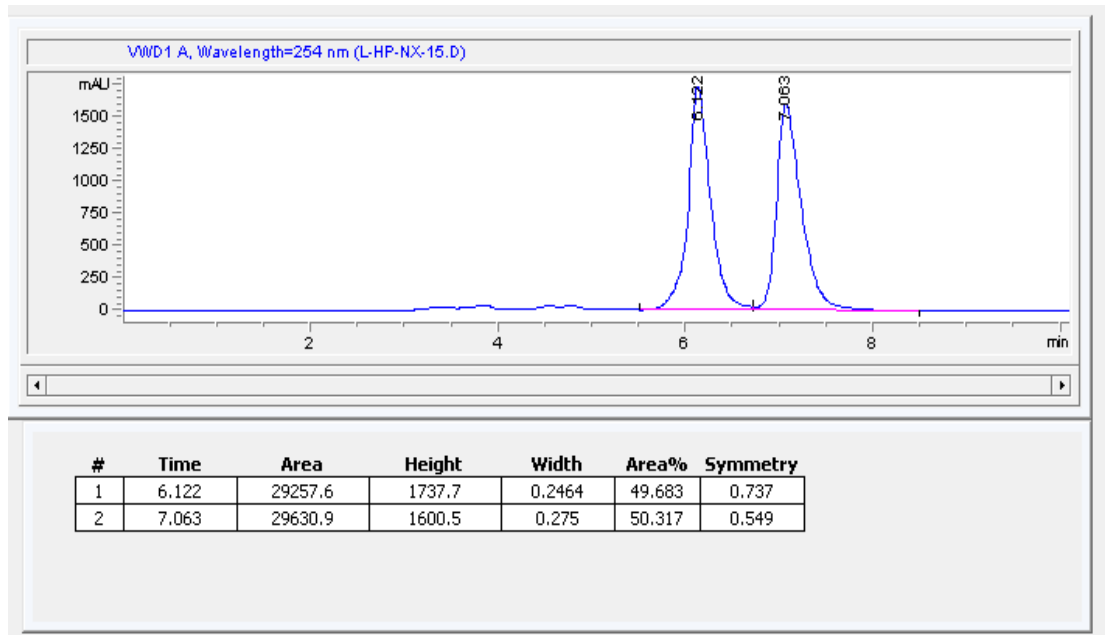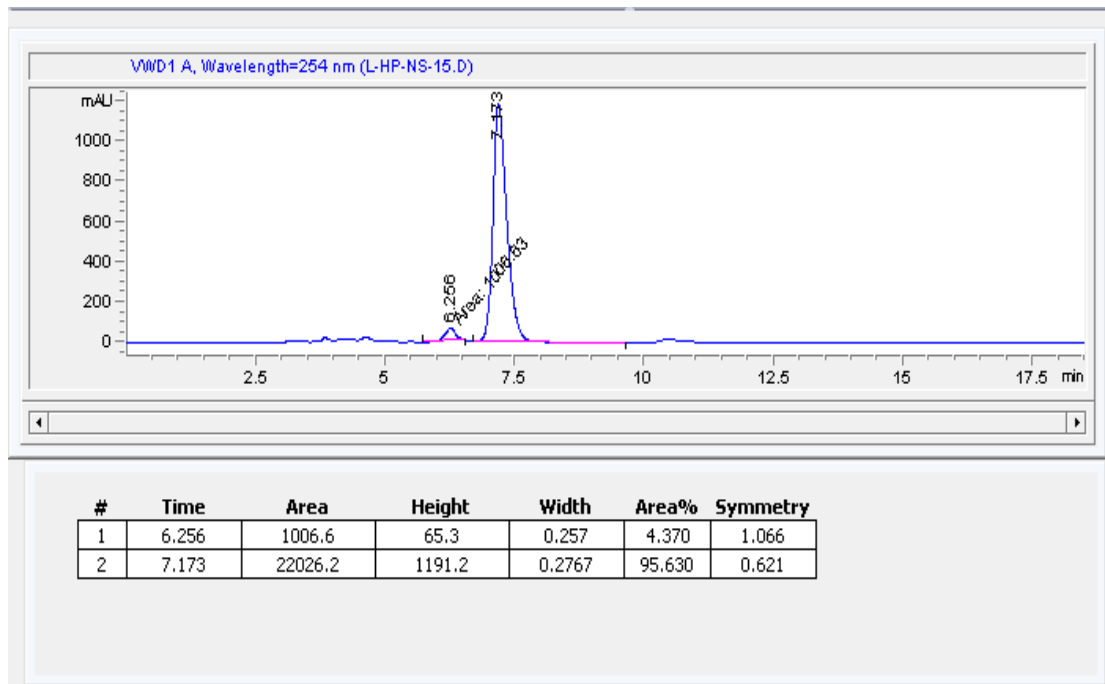

# <sup>1</sup>H and <sup>13</sup>C NMR of 6g

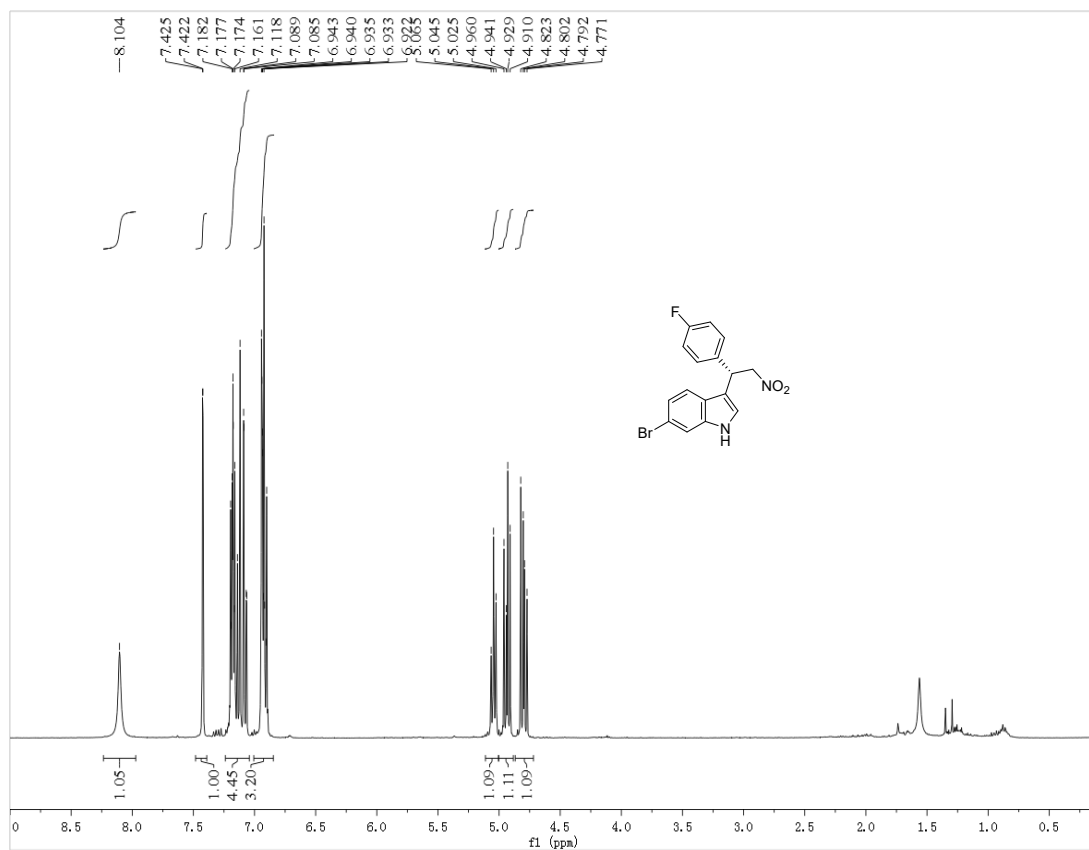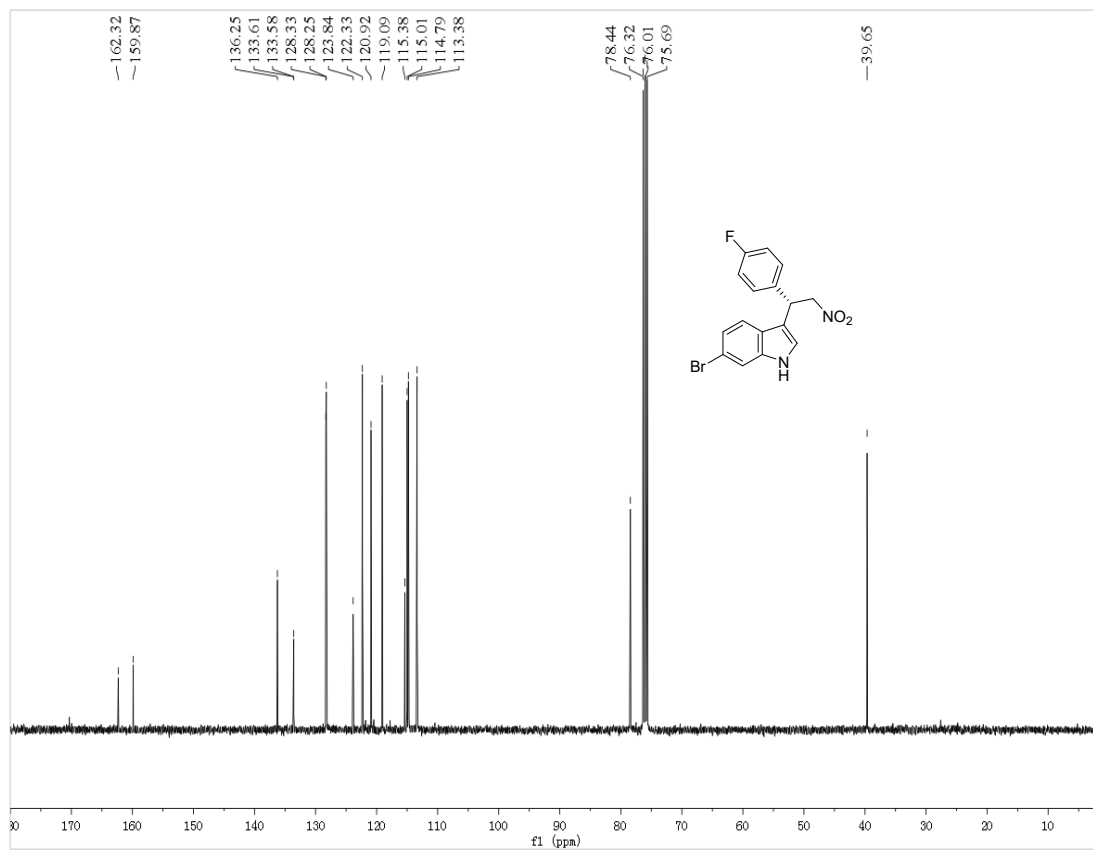

## HPLC of 6g

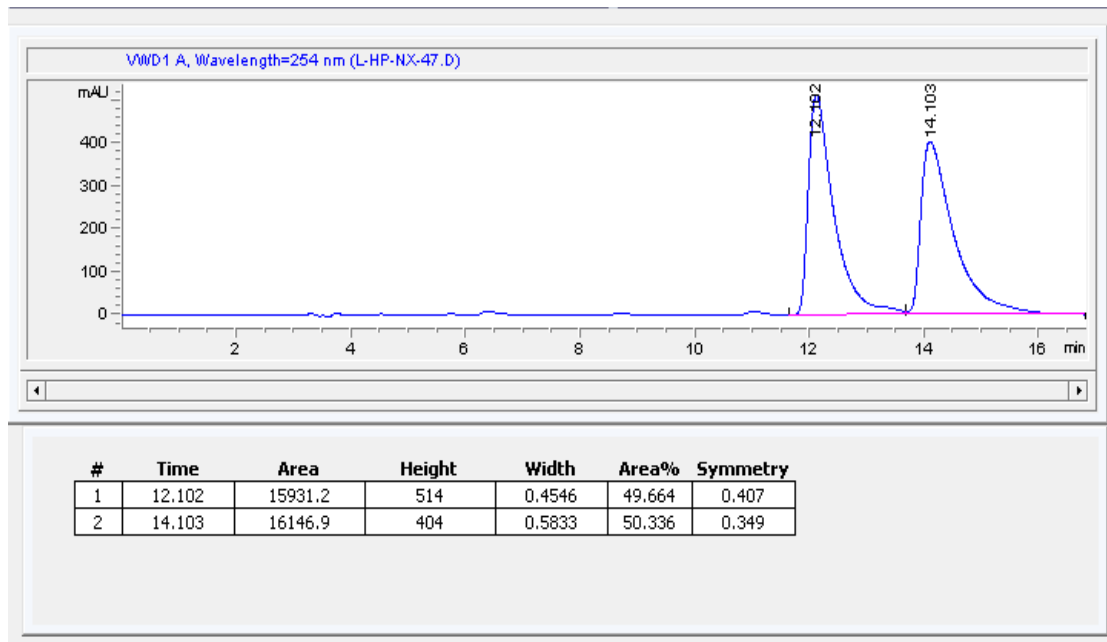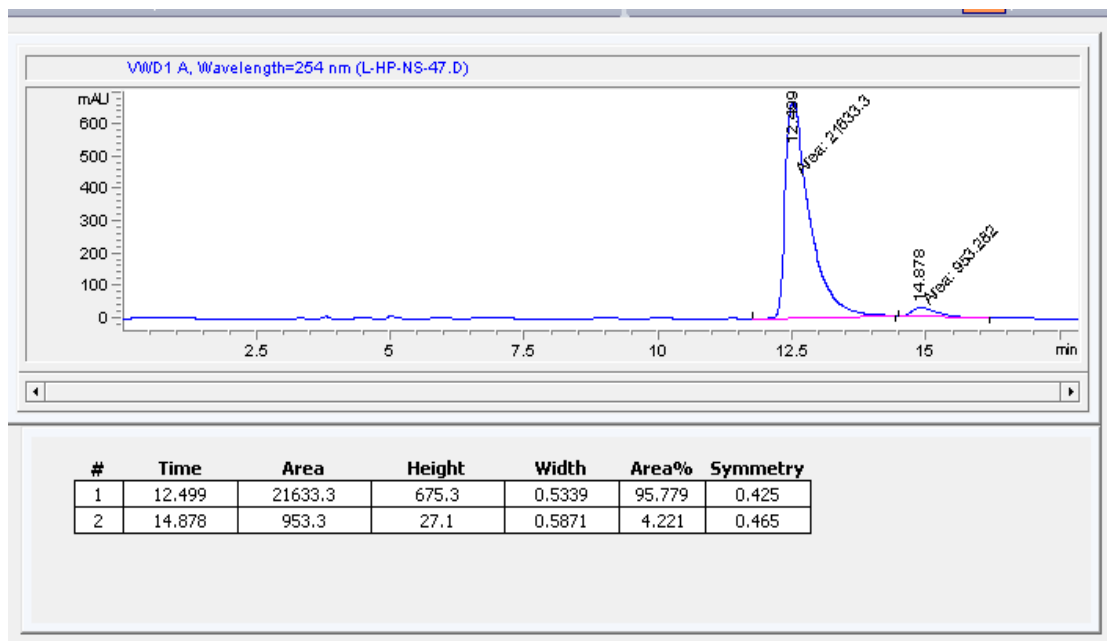



# <sup>1</sup>H and <sup>13</sup>C NMR of 6h

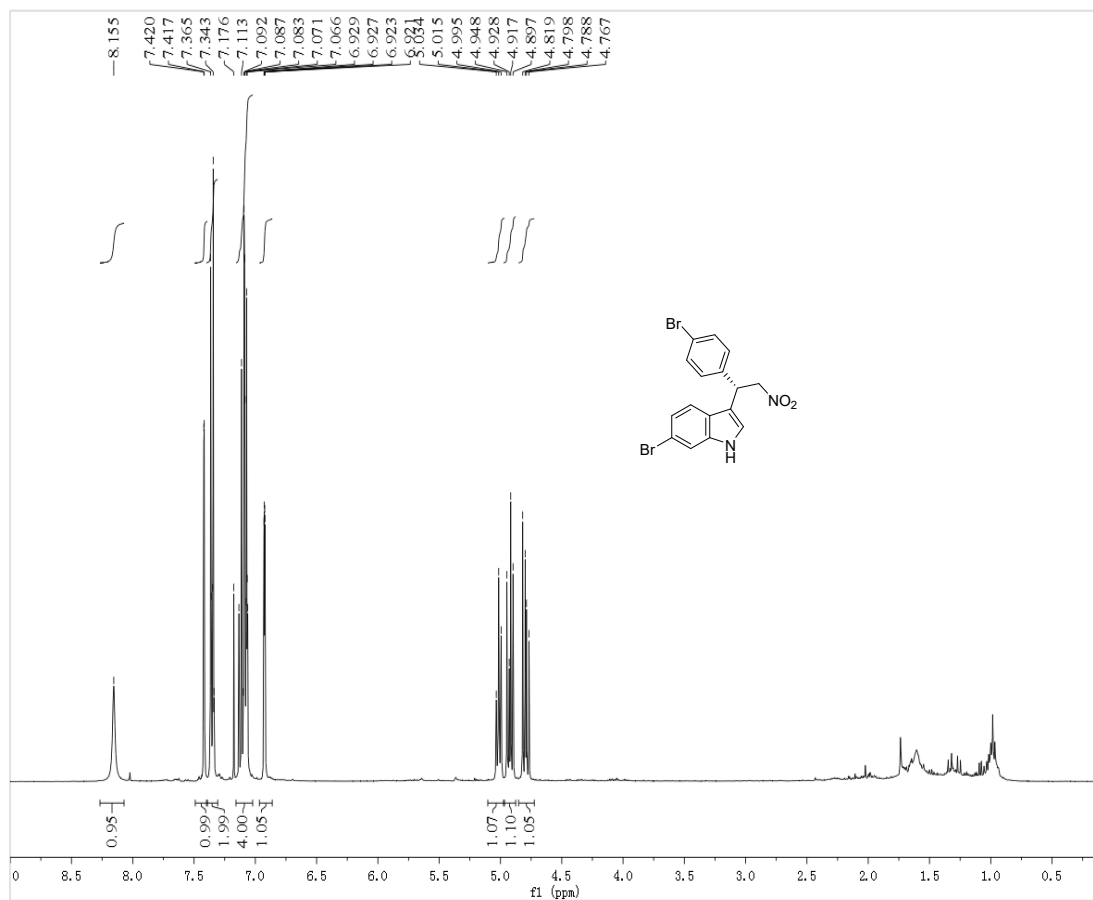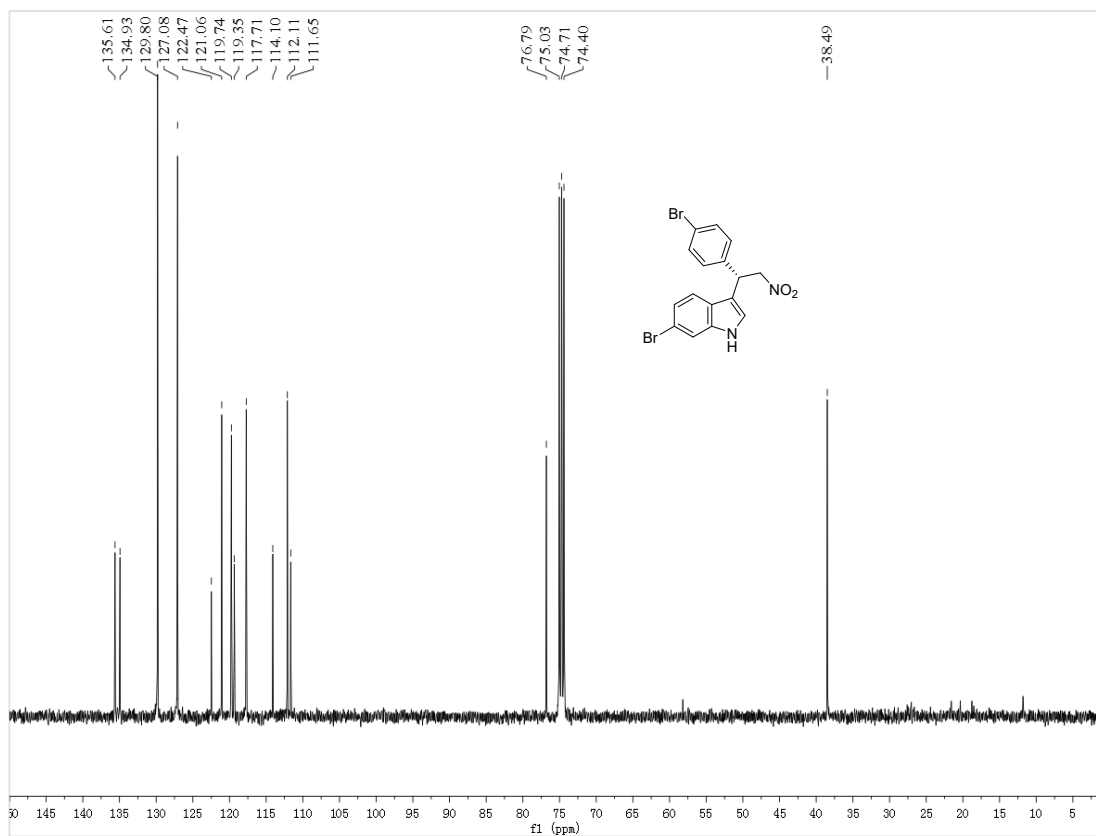

## HPLC of 6h

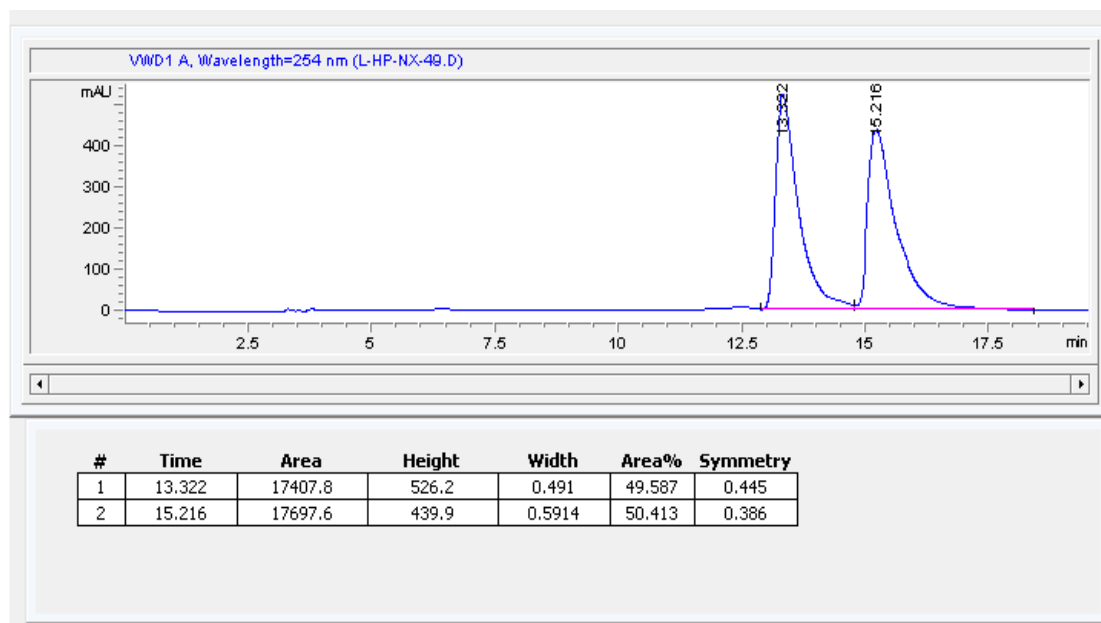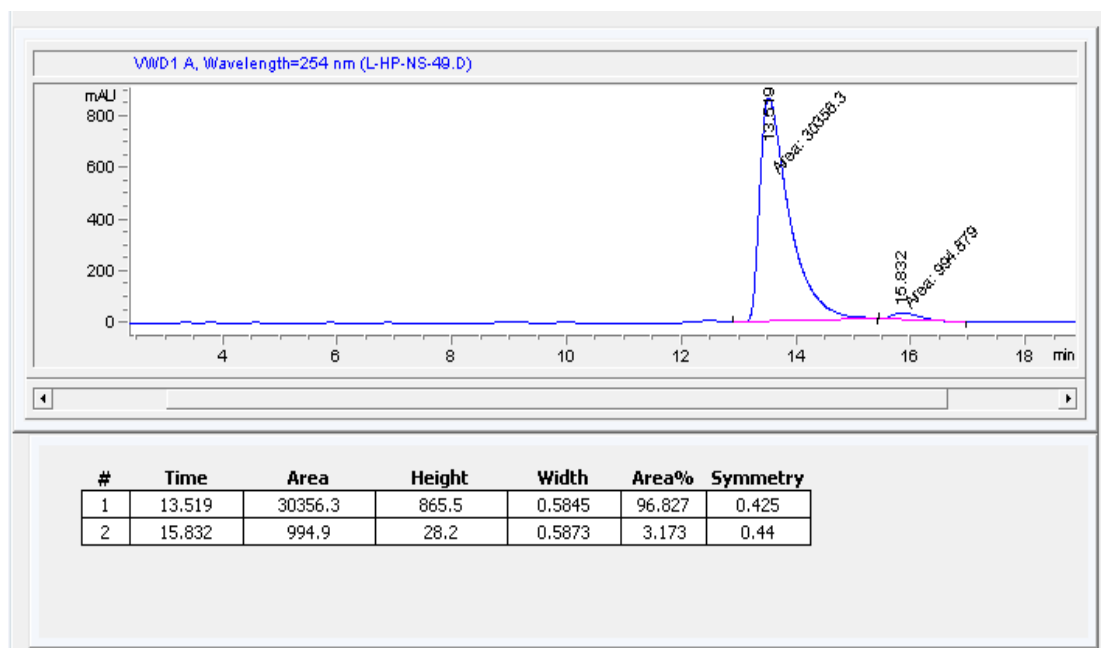

# <sup>1</sup>H and <sup>13</sup>C NMR of 6i

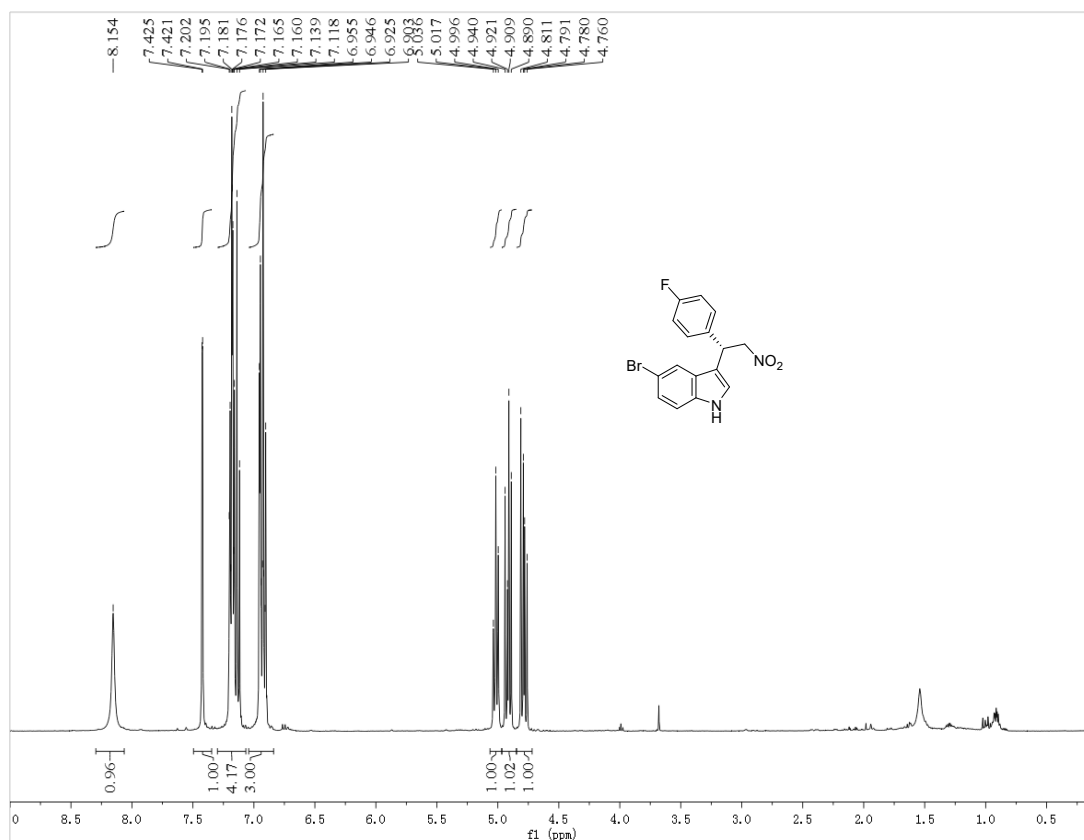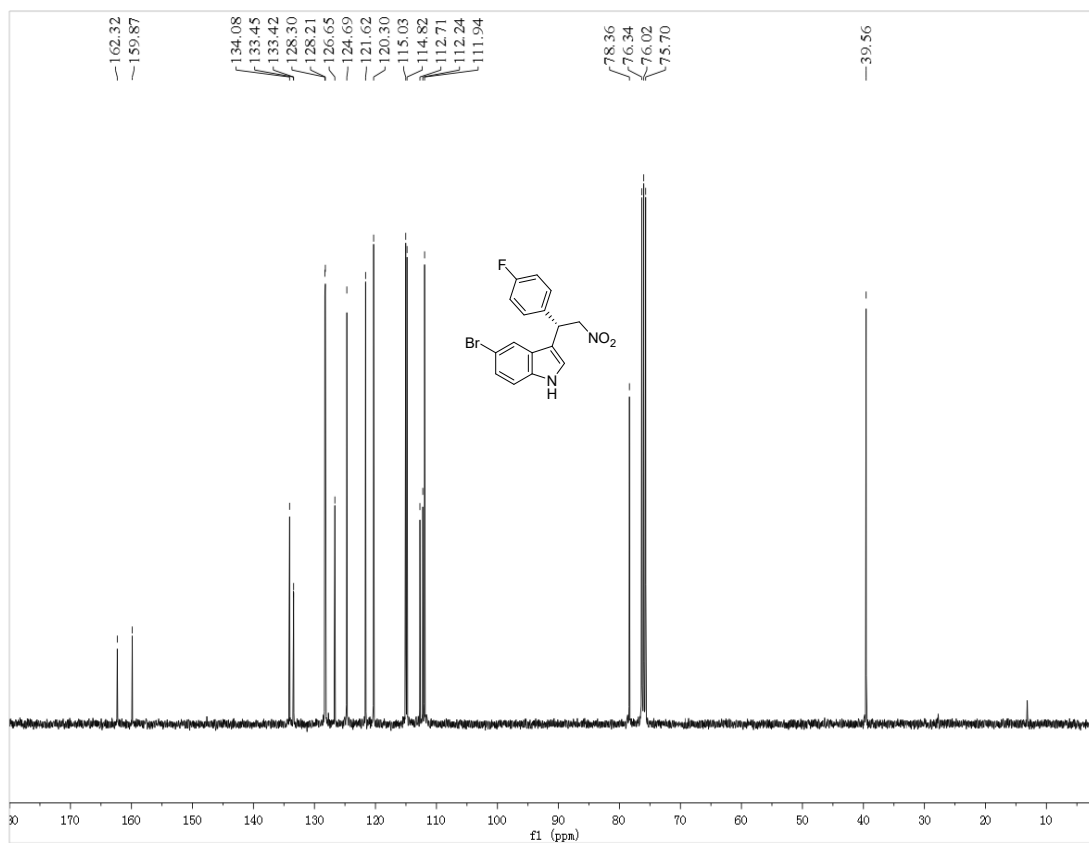

## HPLC of 6i

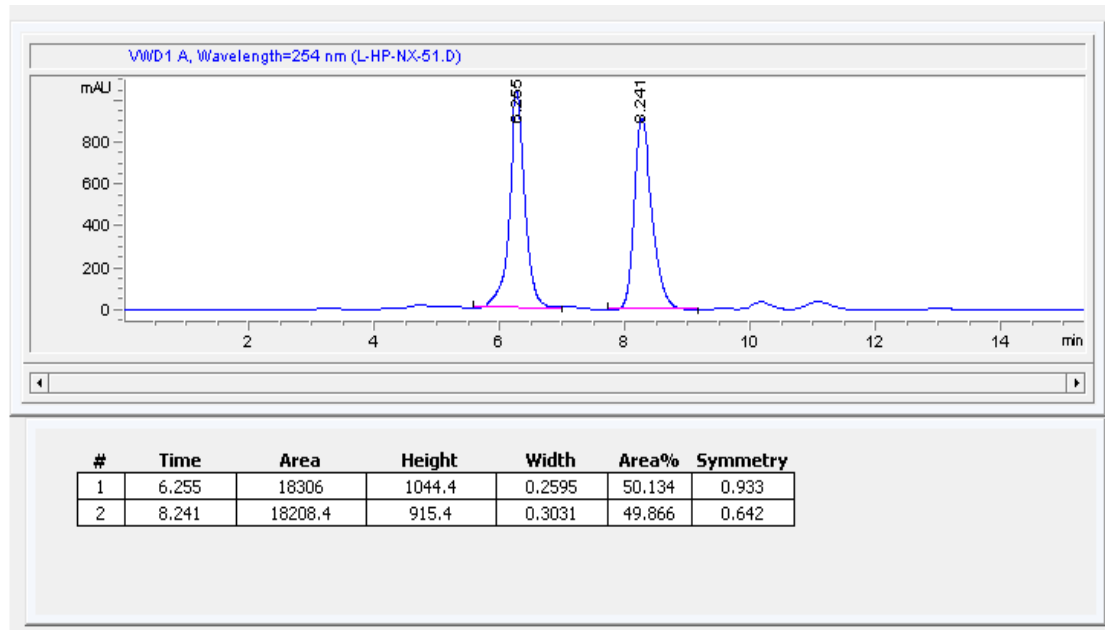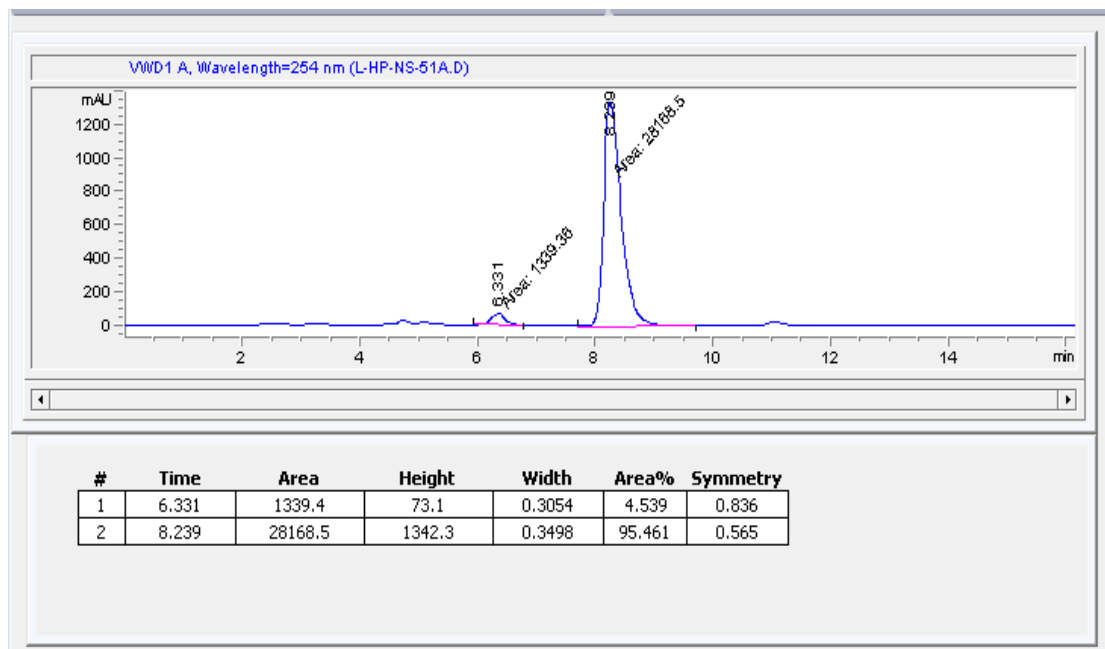

# <sup>1</sup>H and <sup>13</sup>C NMR of 6j

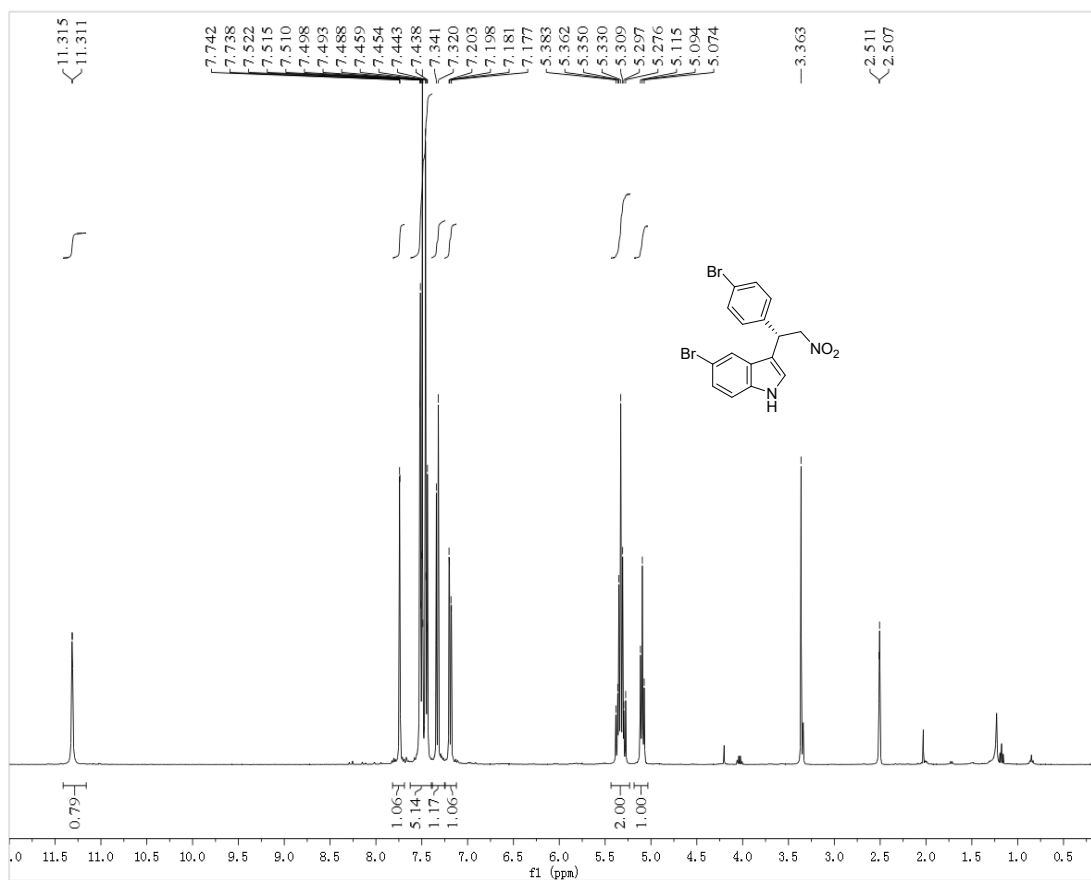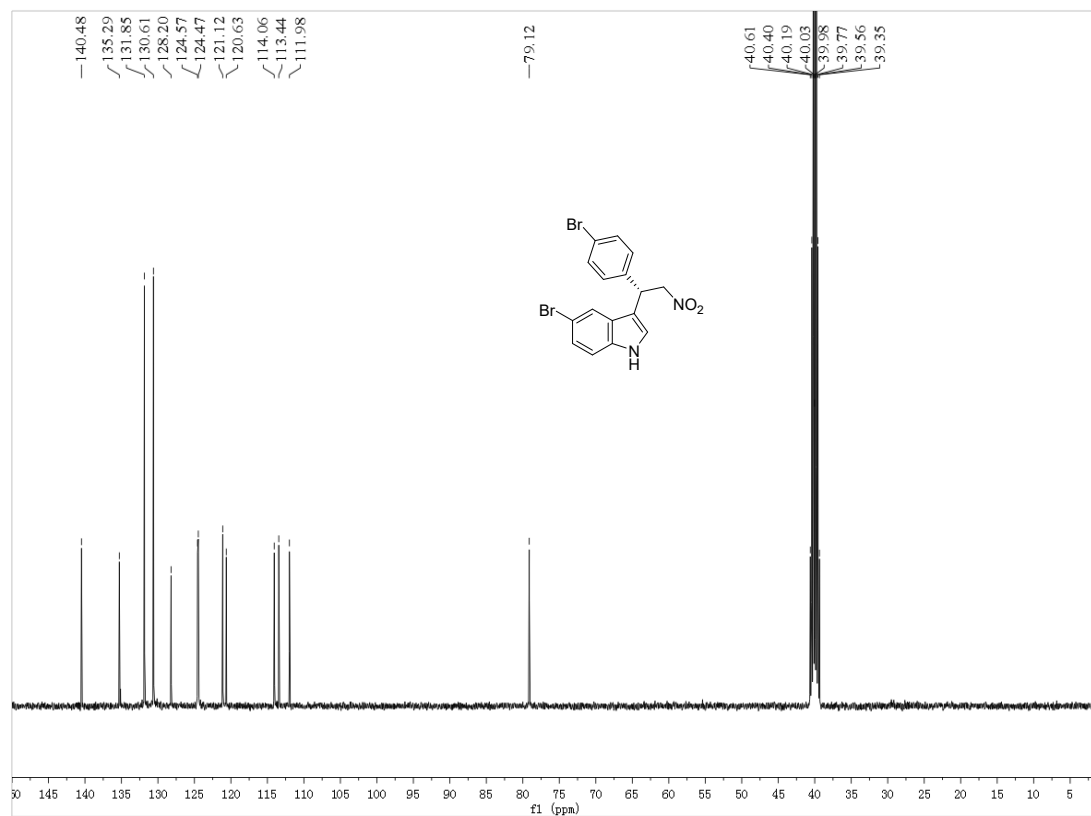

## HPLC of 6j

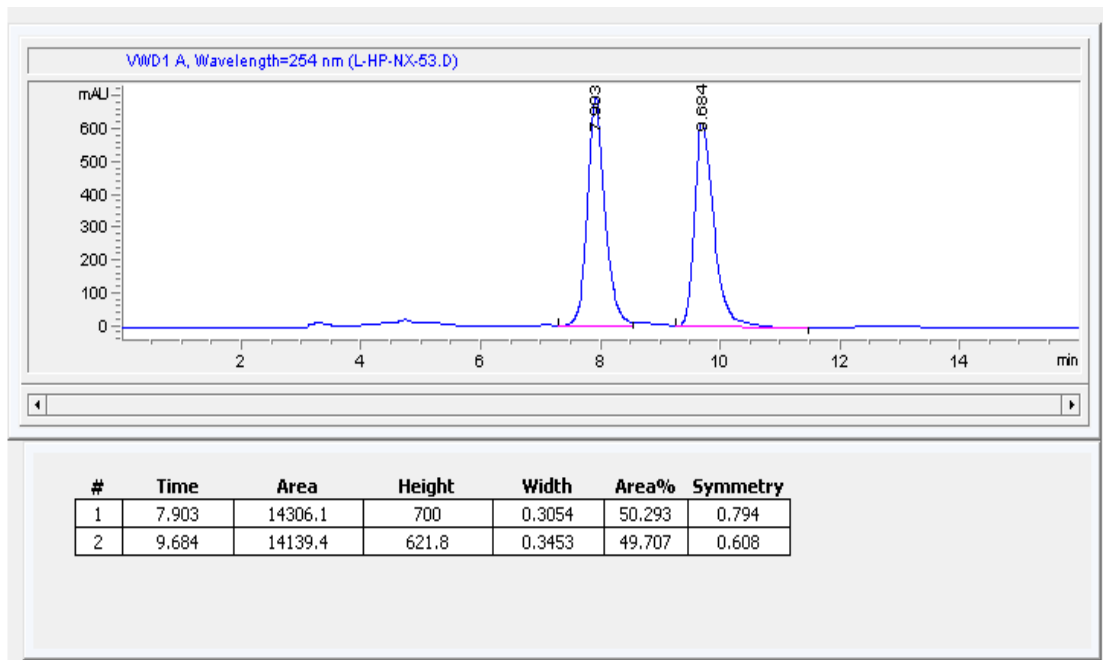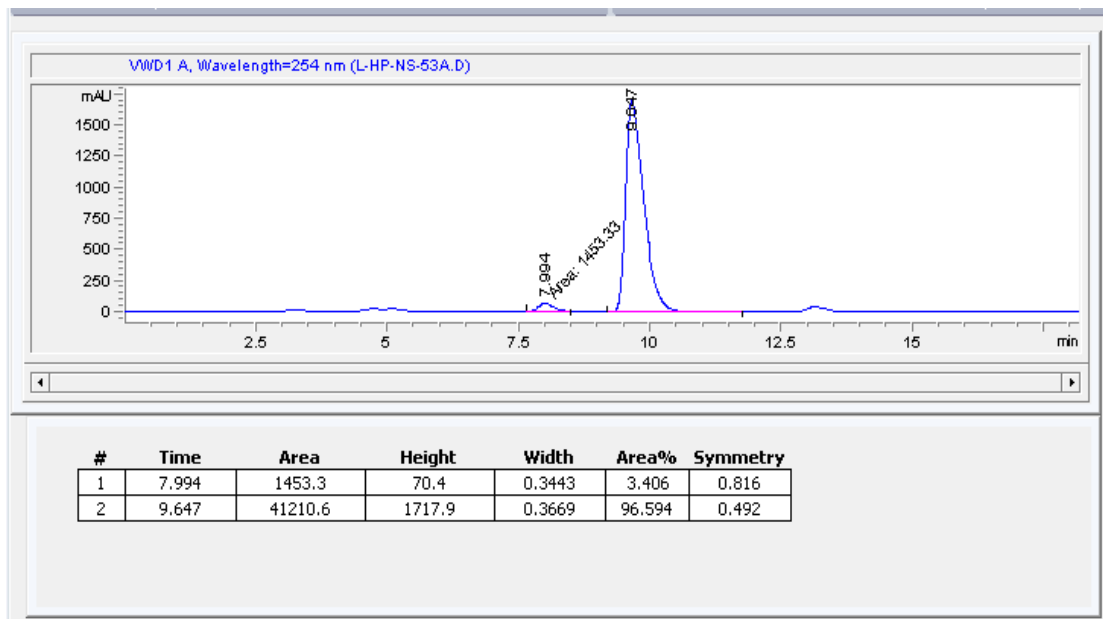

# <sup>1</sup>H and <sup>13</sup>C NMR of 6k

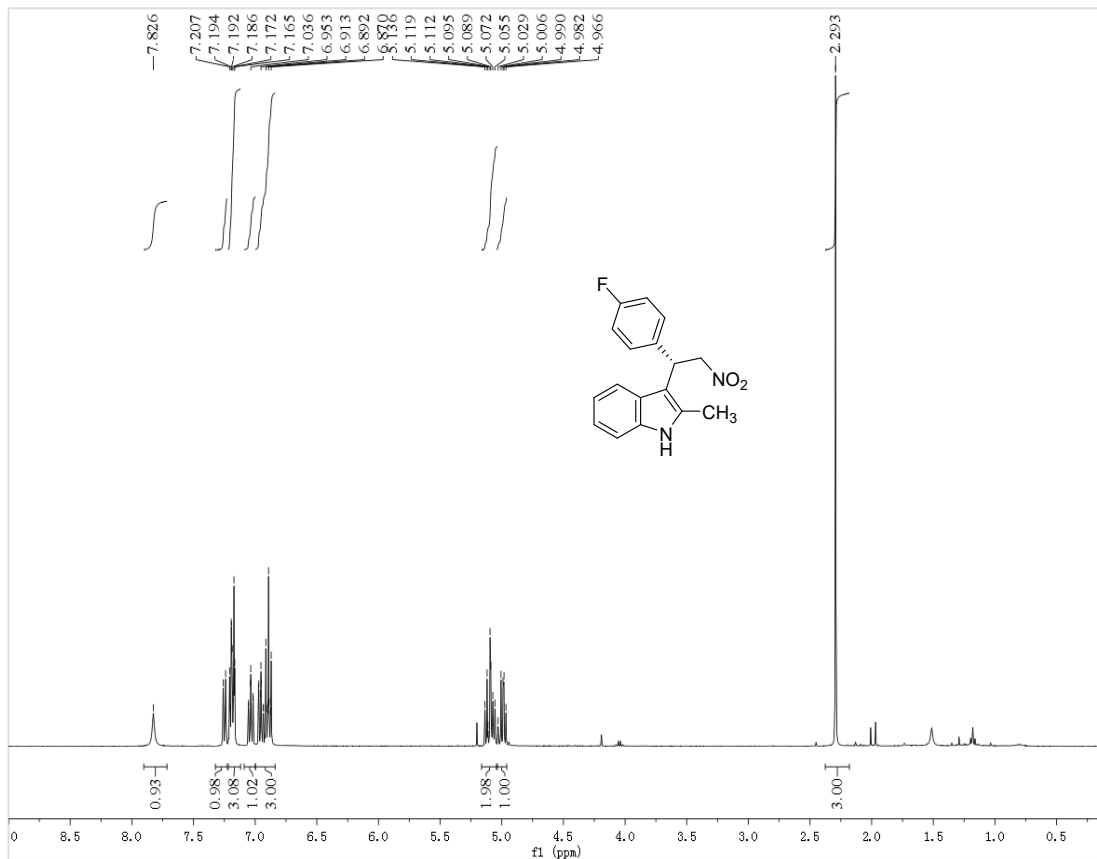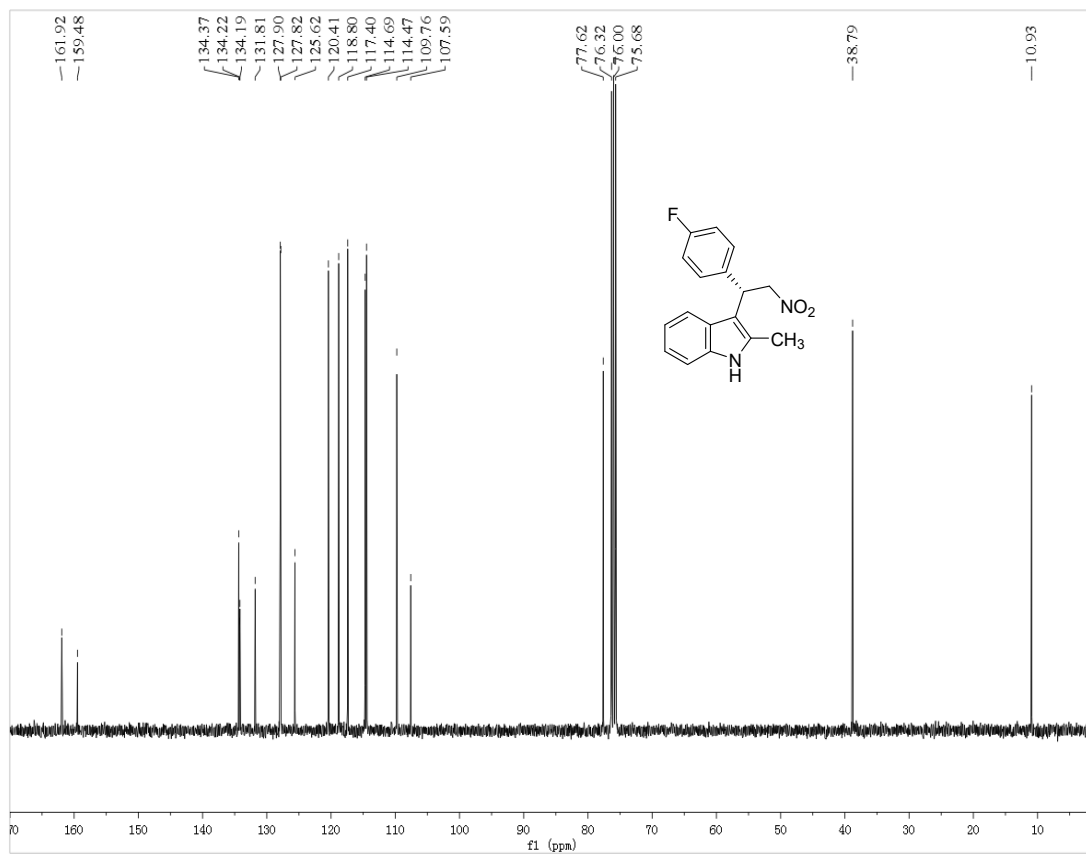

## HPLC of 6k

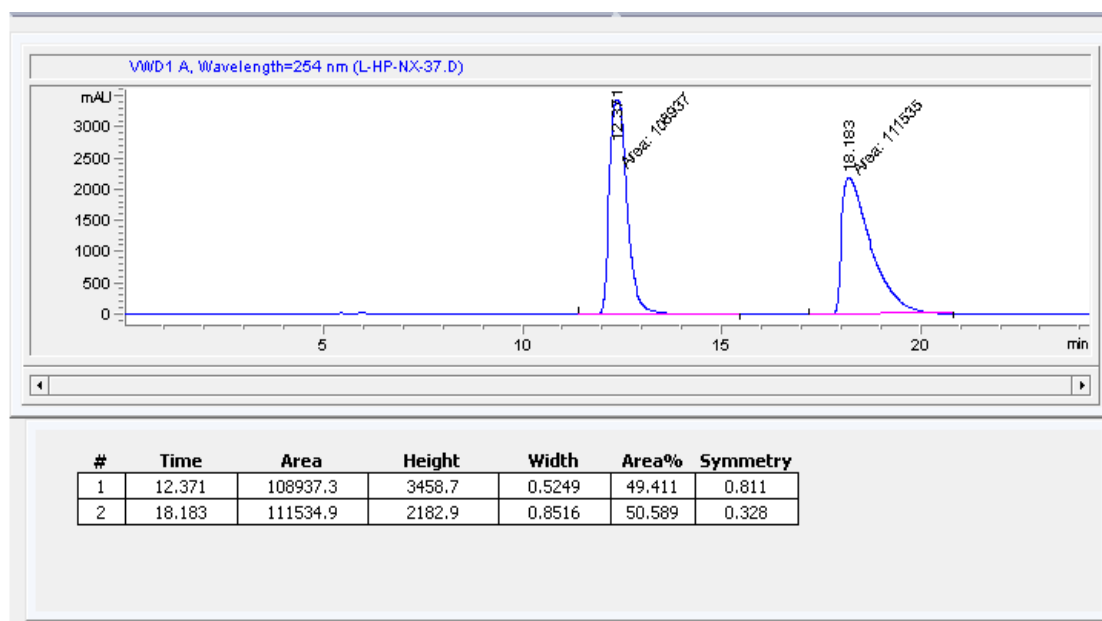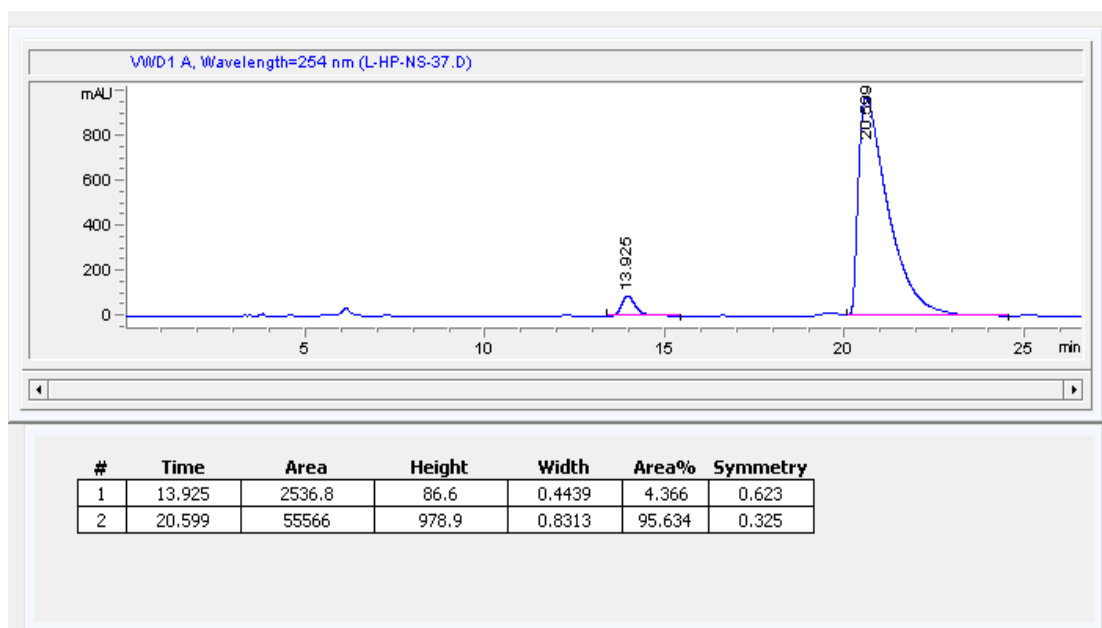



# <sup>1</sup>H and <sup>13</sup>C NMR of 6l

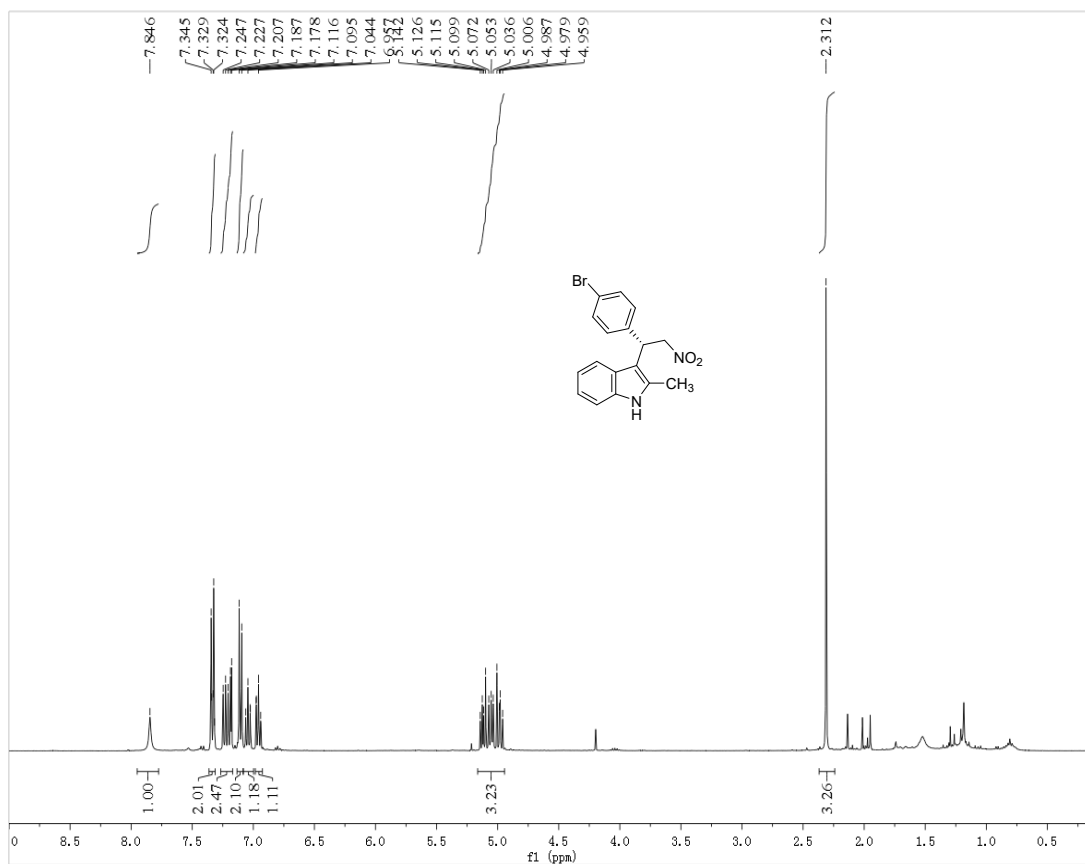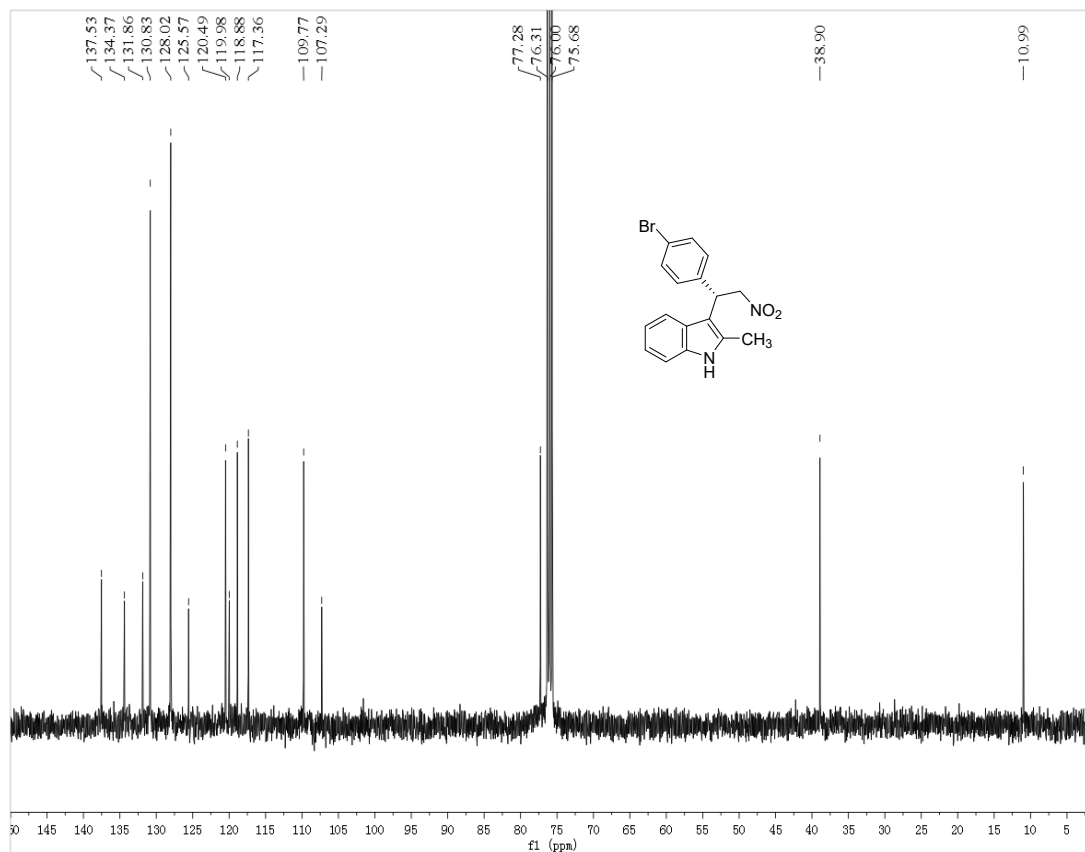

## HPLC of 6l

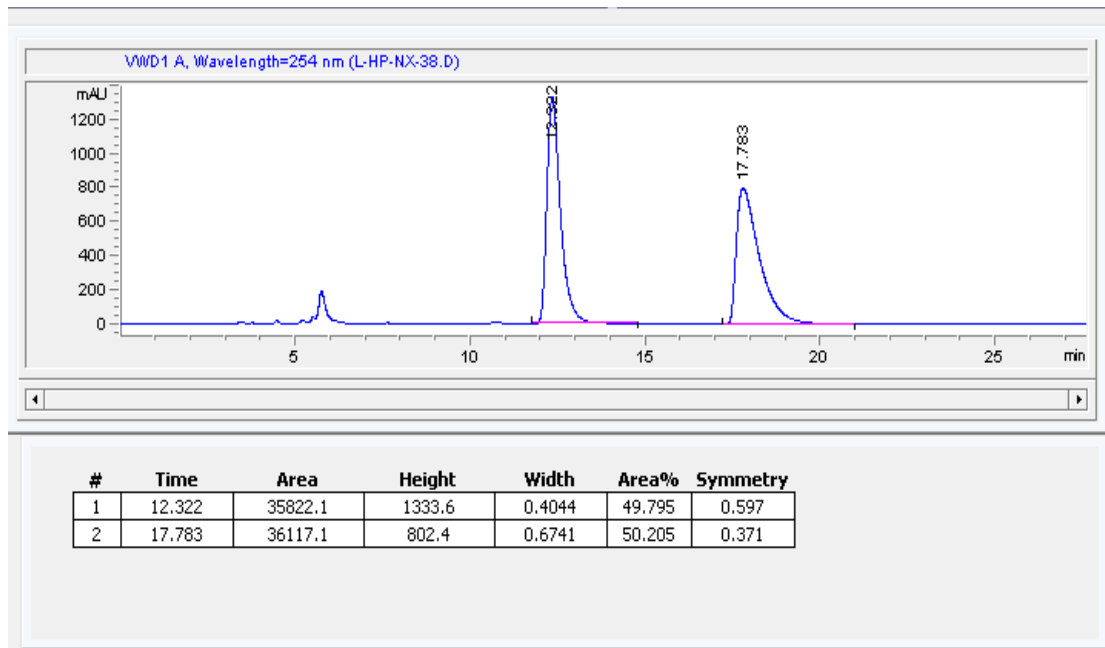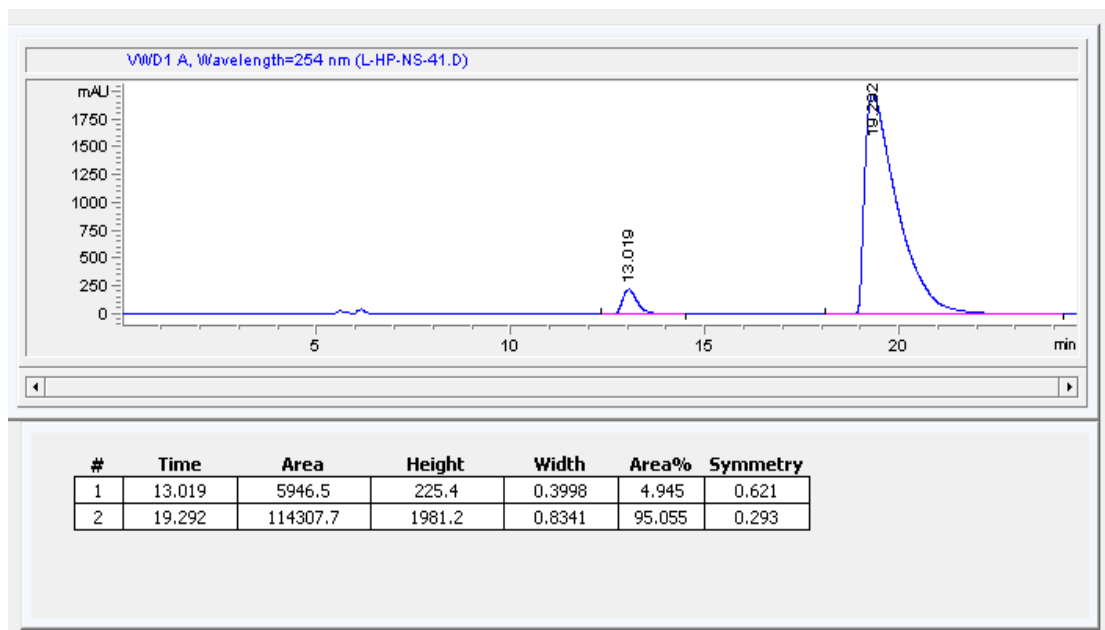

# <sup>1</sup>H and <sup>13</sup>C NMR of 6m

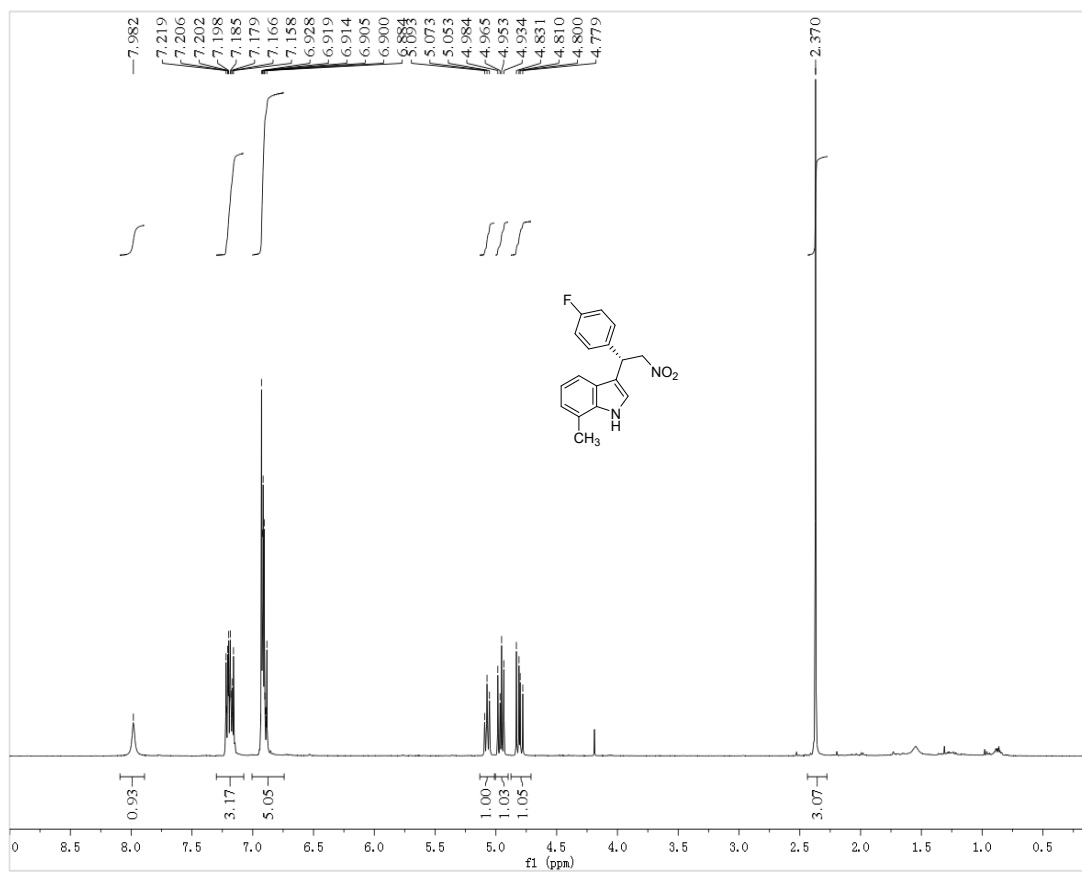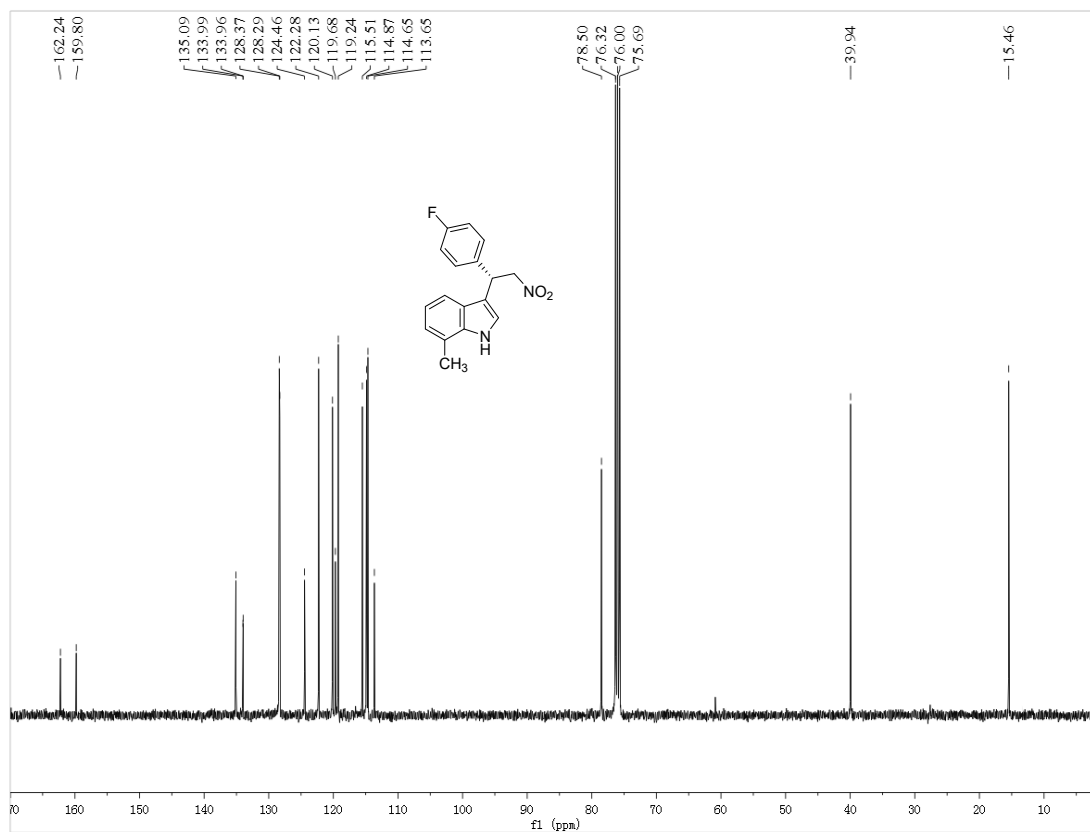

### HPLC of 6m

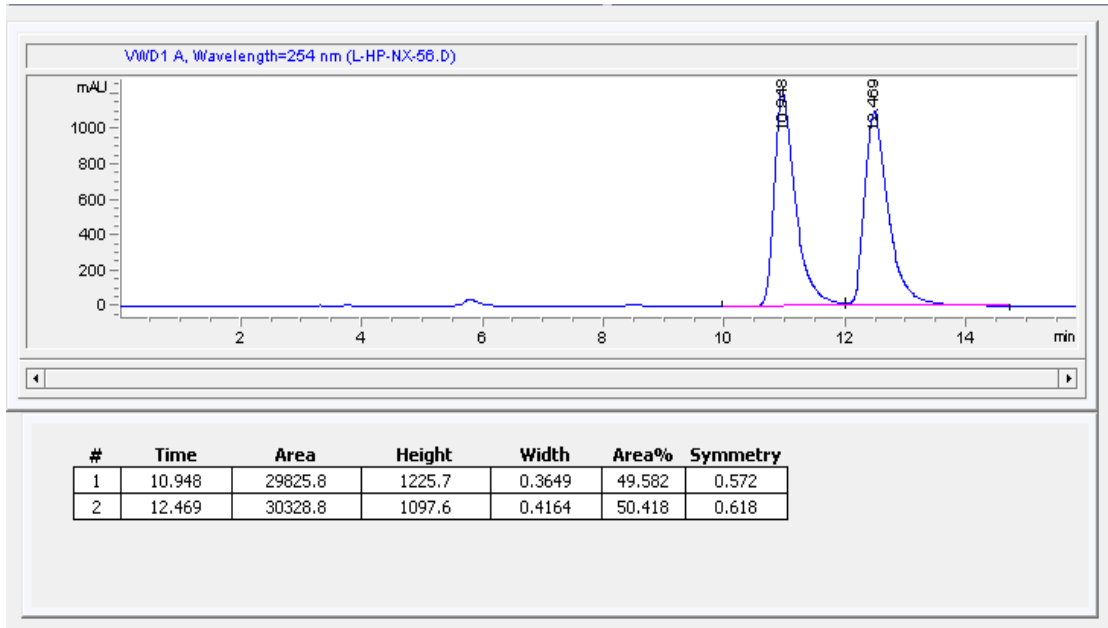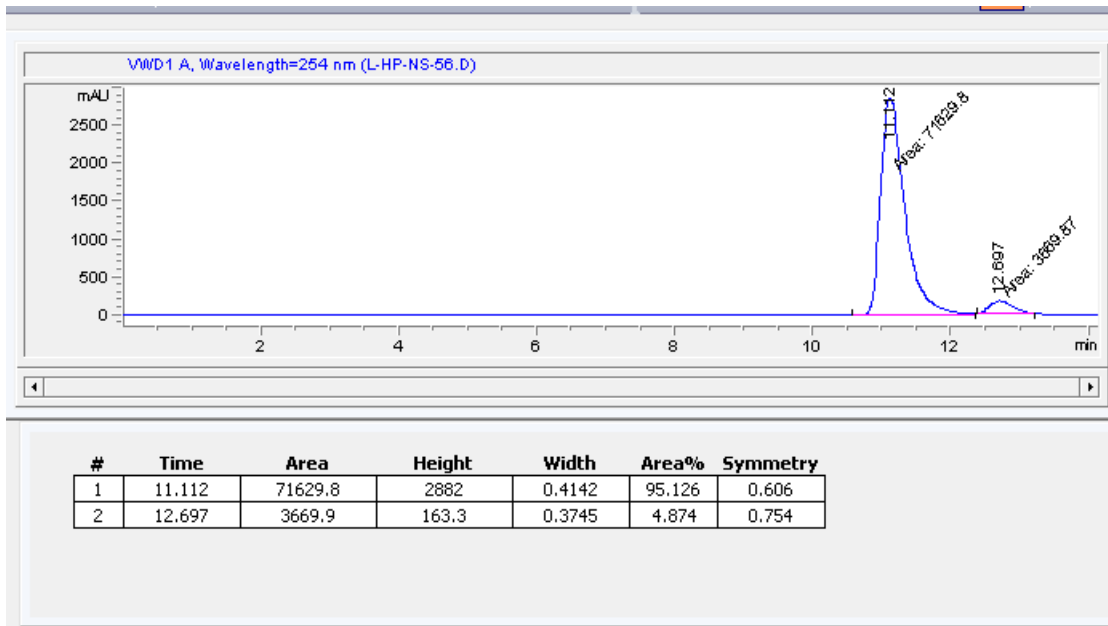

# <sup>1</sup>H and <sup>13</sup>C NMR of 6n

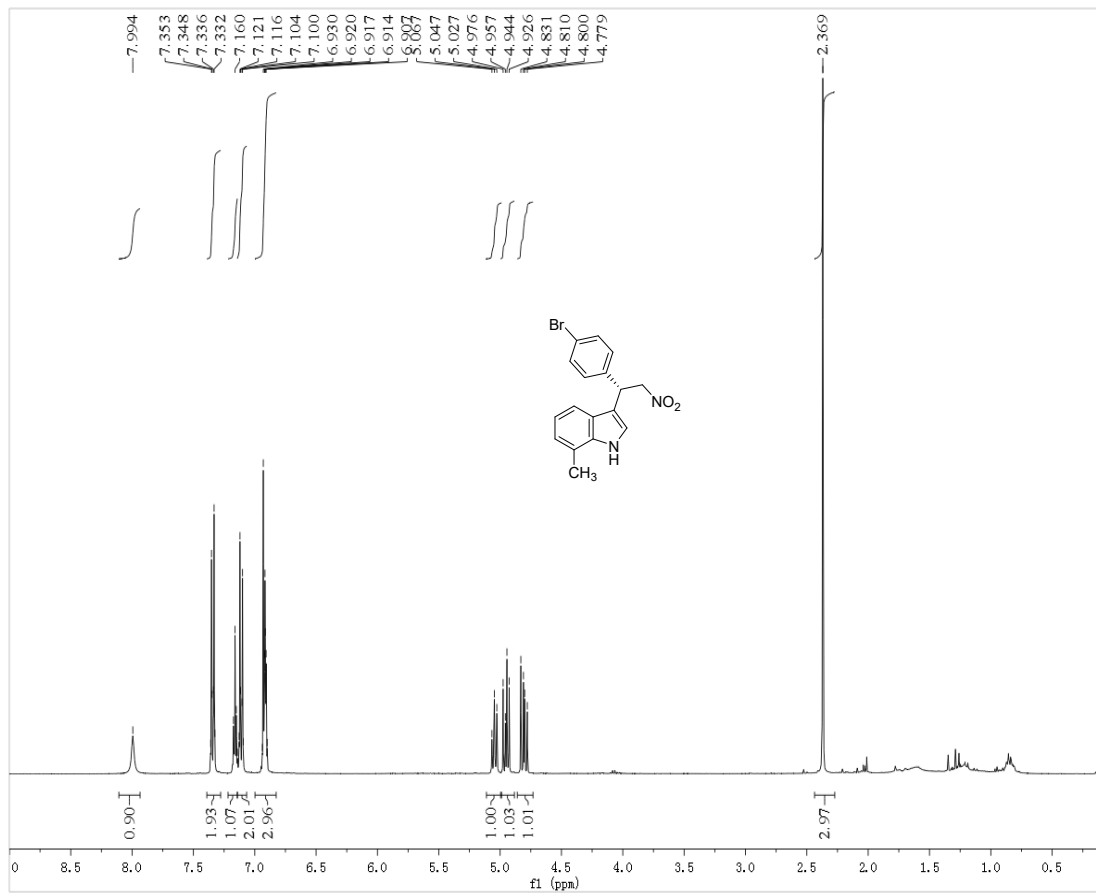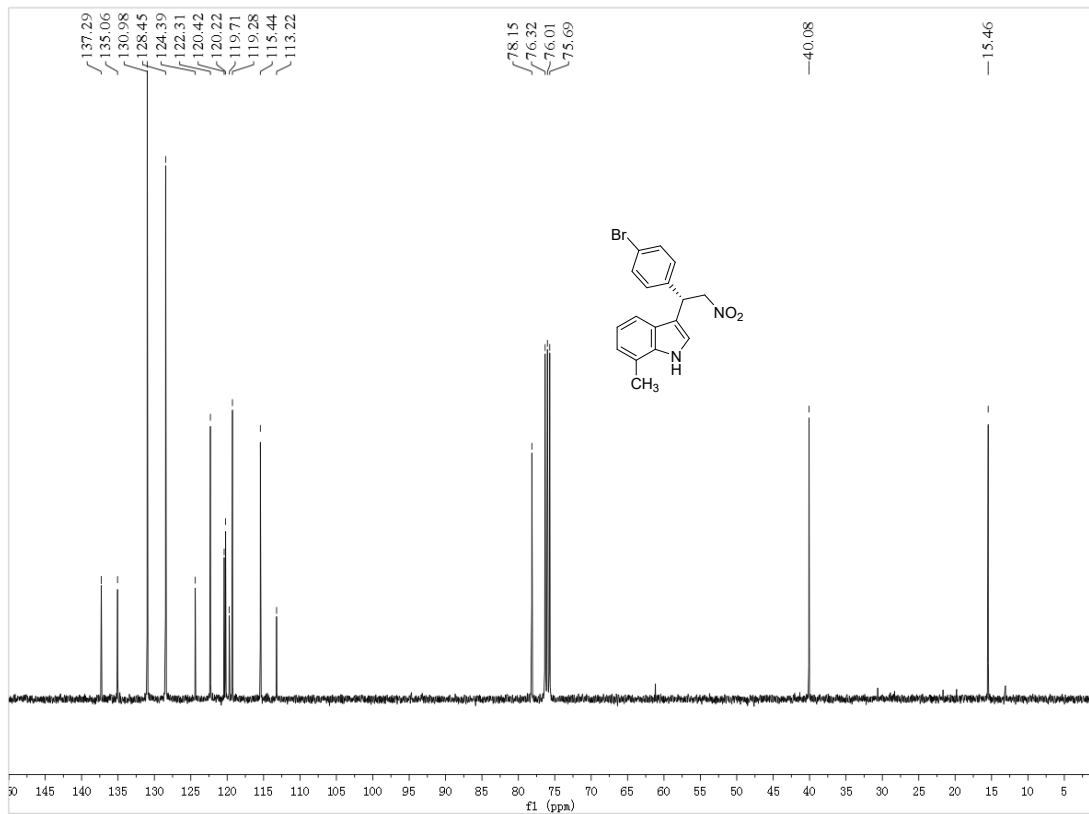

## HPLC of 6n

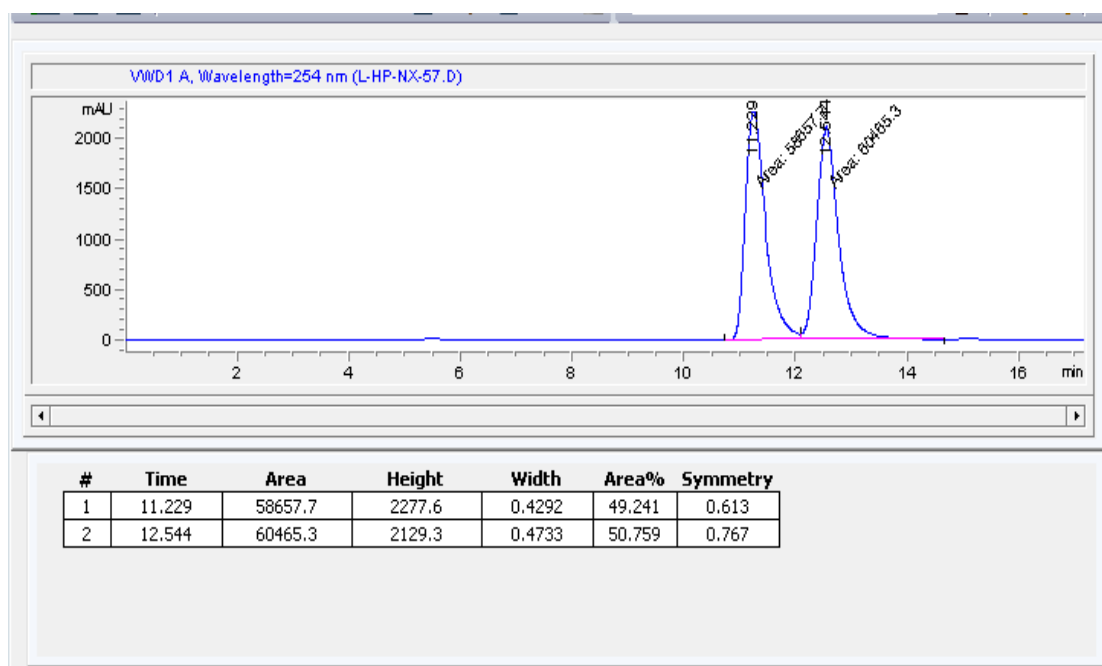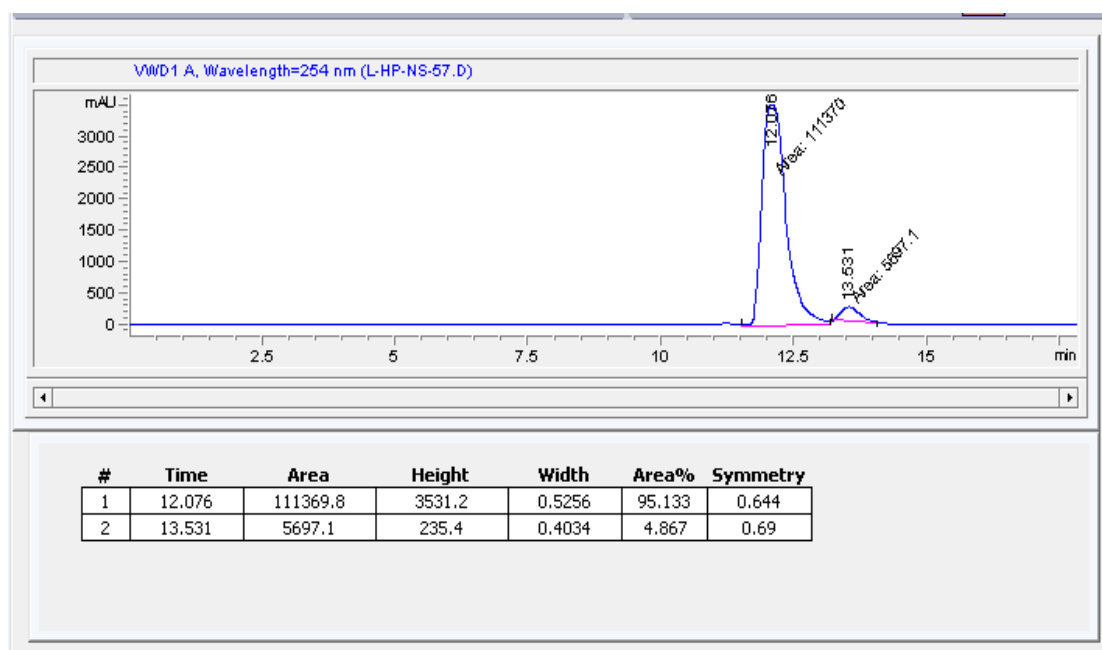

# <sup>1</sup>H and <sup>13</sup>C NMR of 60

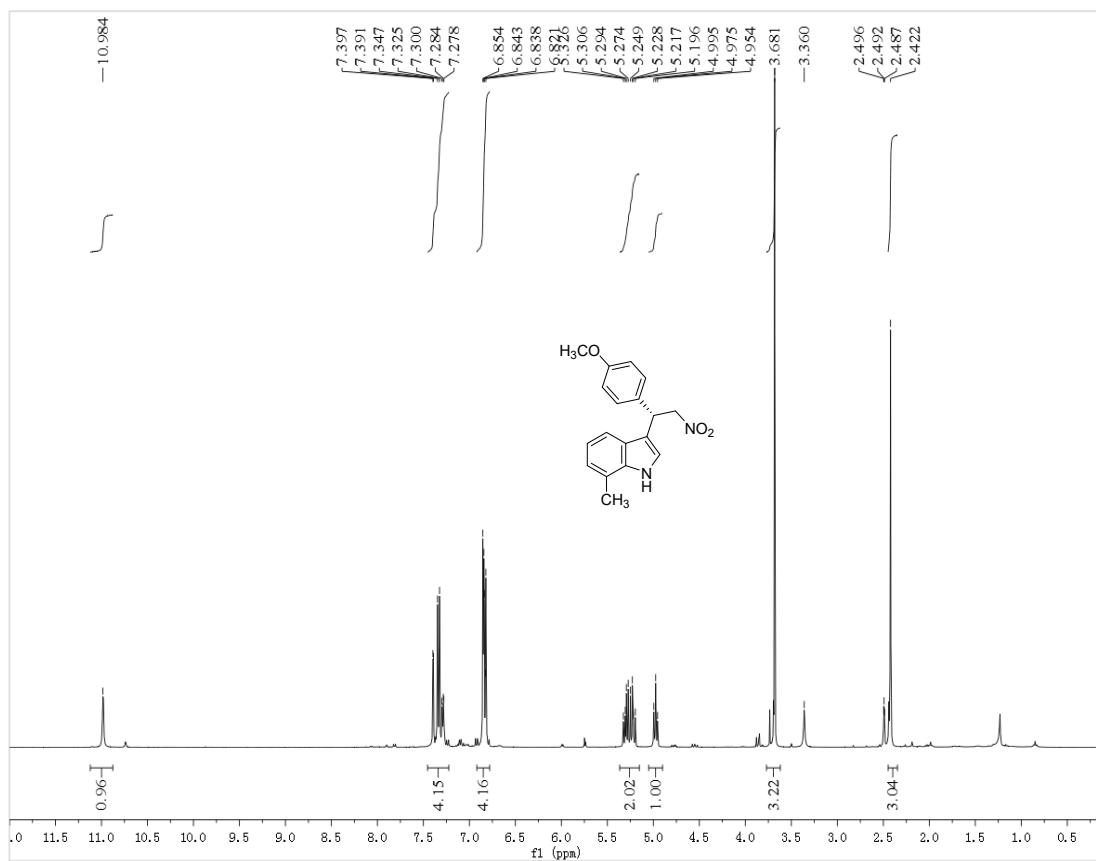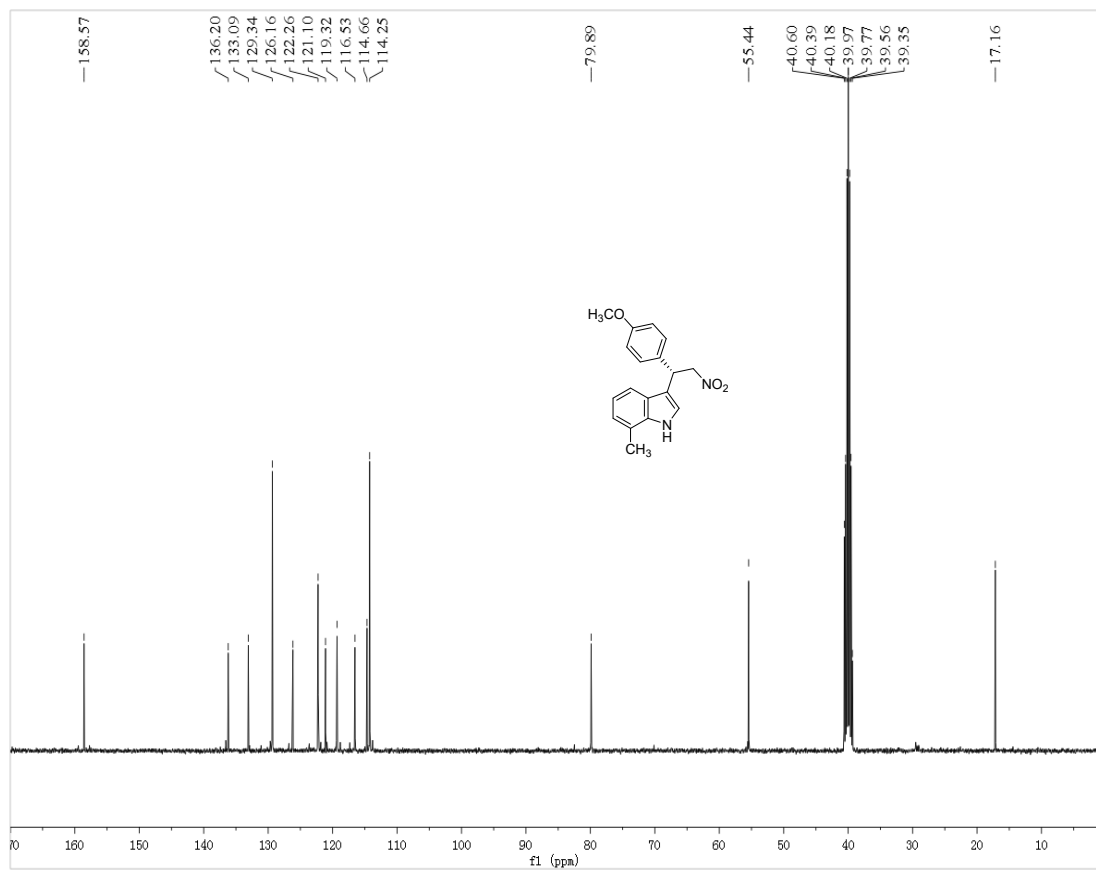

## HPLC of 60

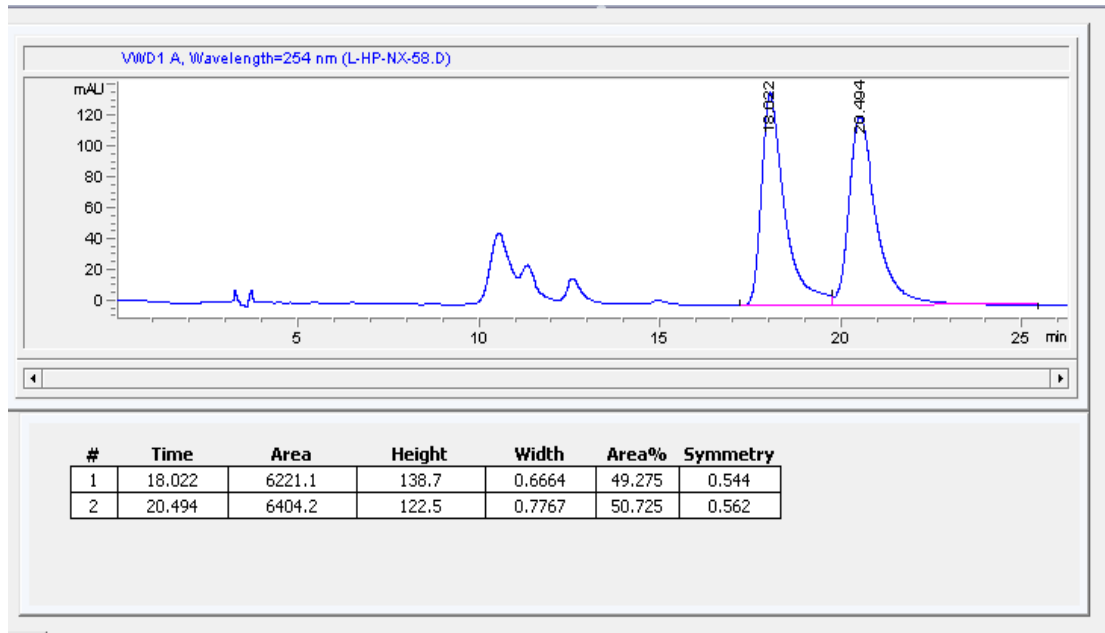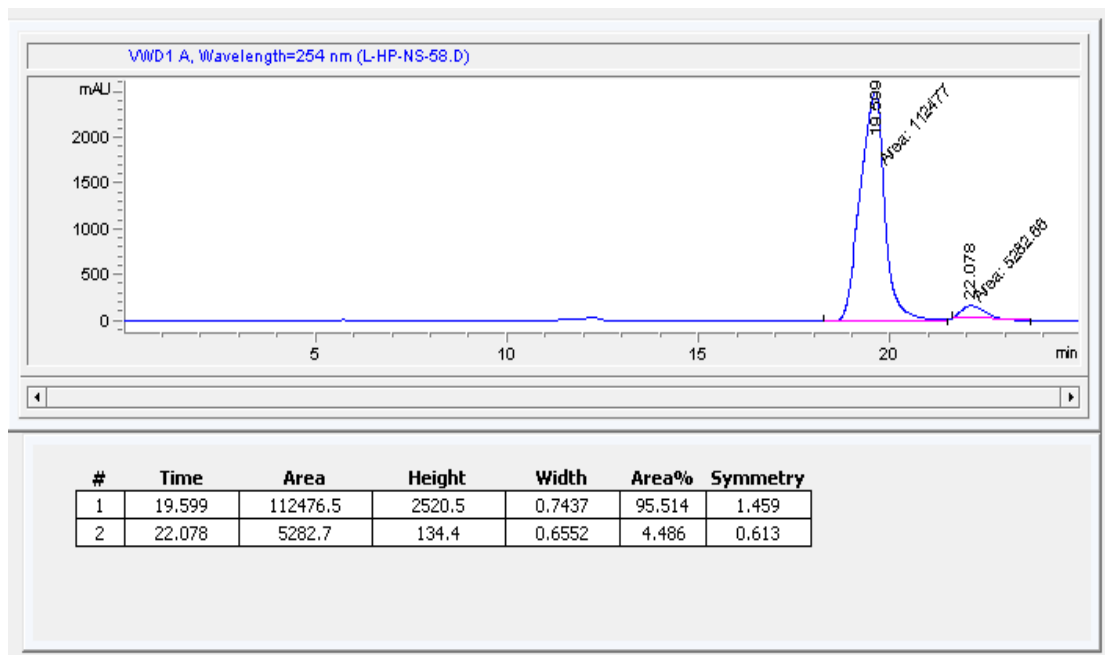



# <sup>1</sup>H and <sup>13</sup>C NMR of 6p

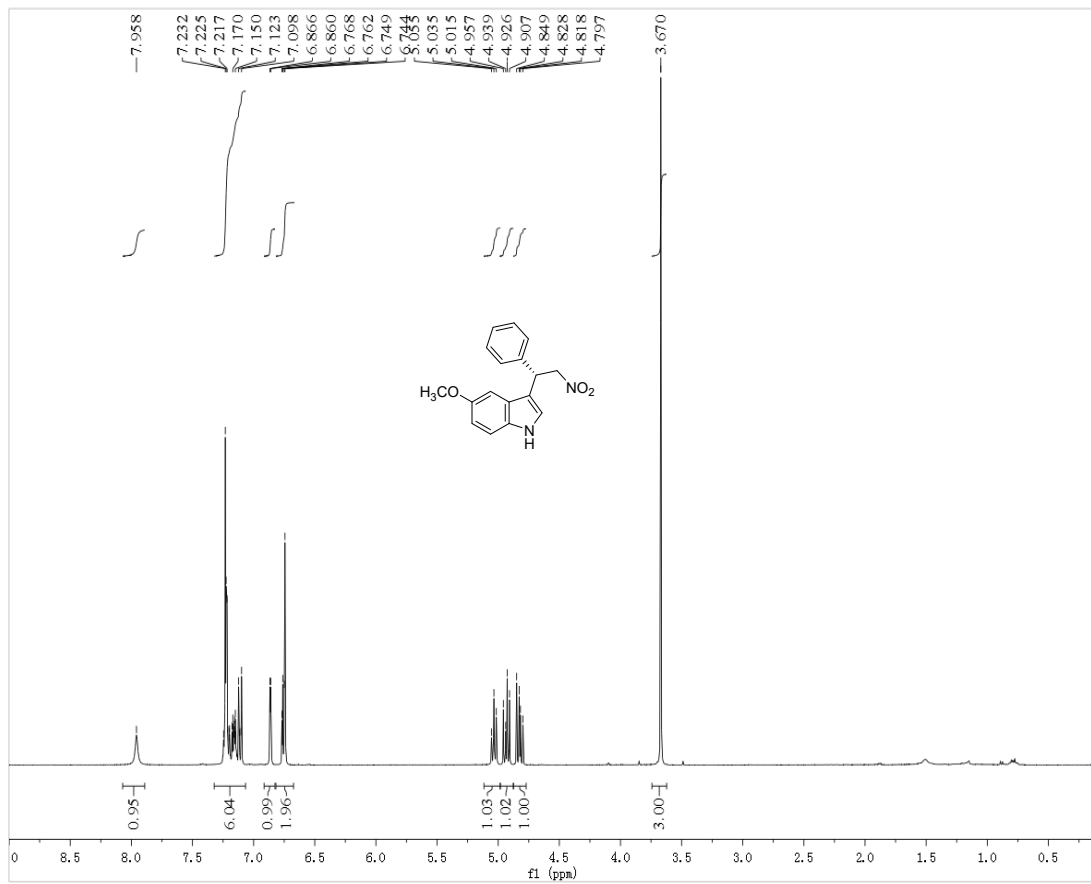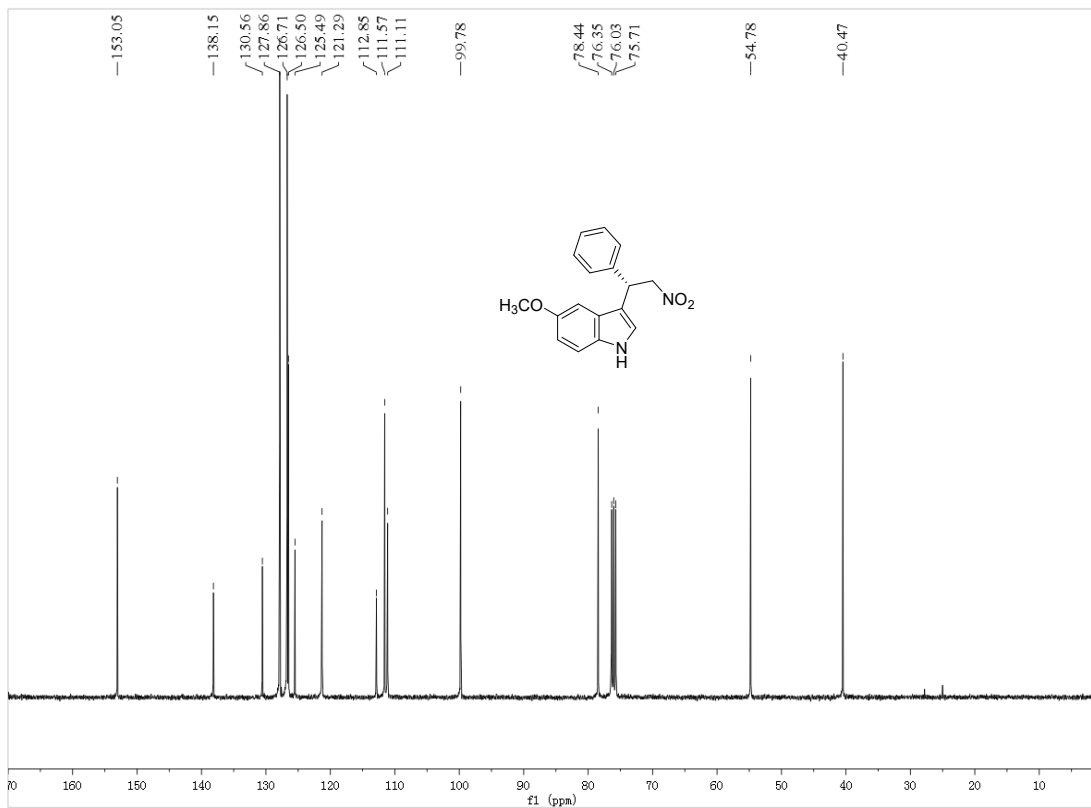

## HPLC of 6p

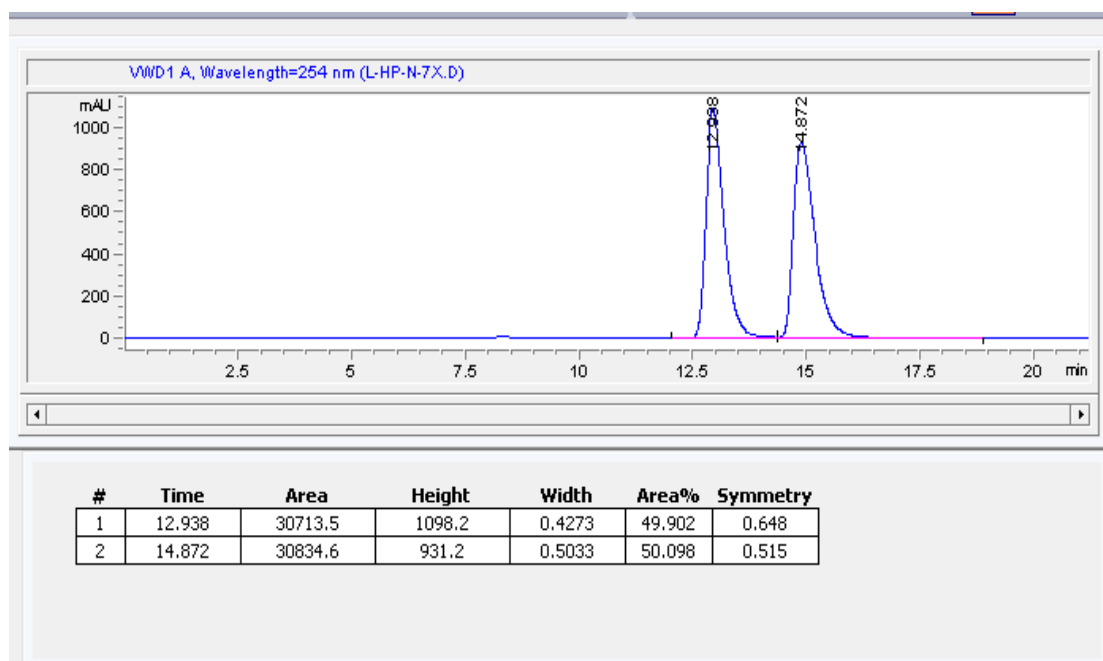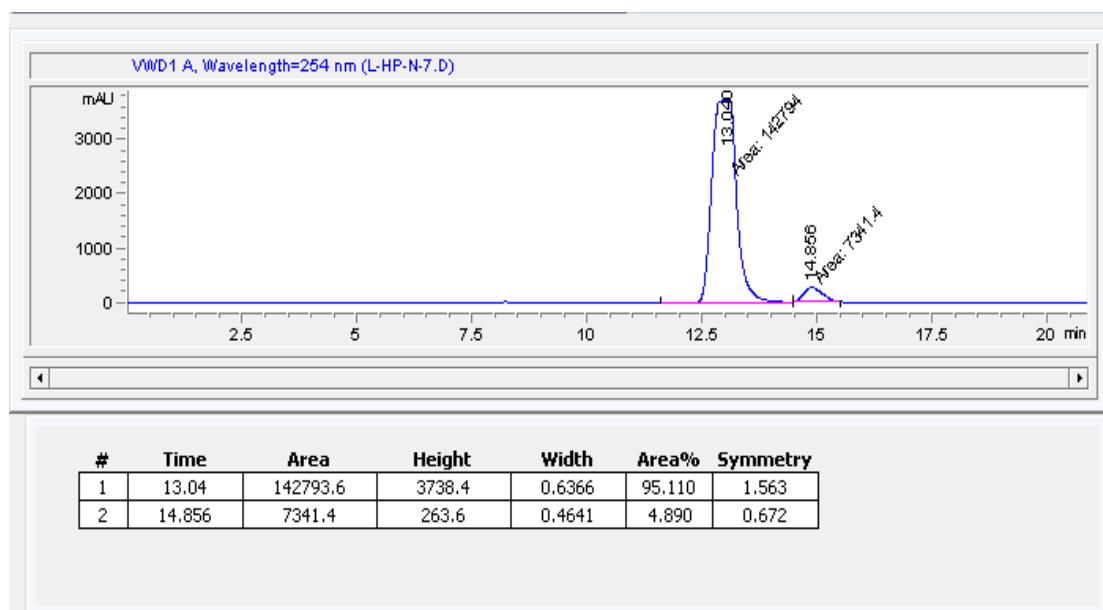

# <sup>1</sup>H and <sup>13</sup>C NMR of 6q

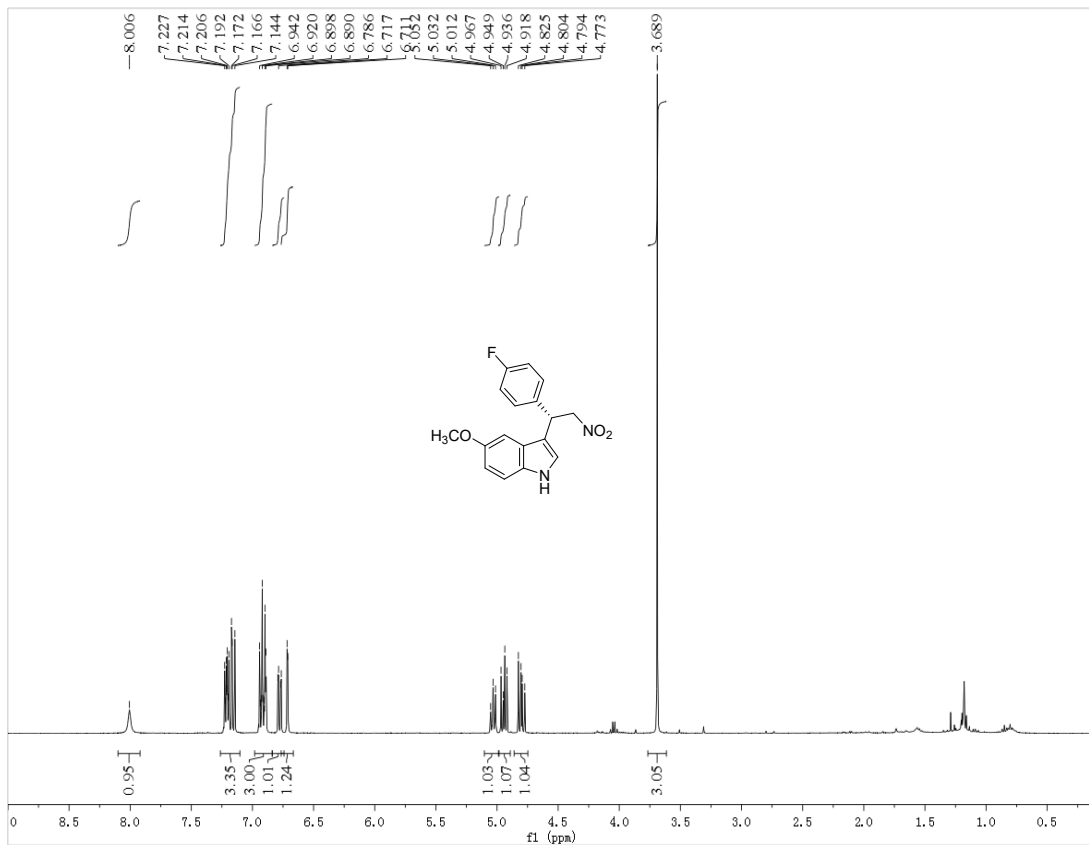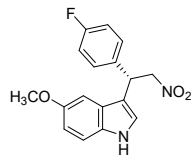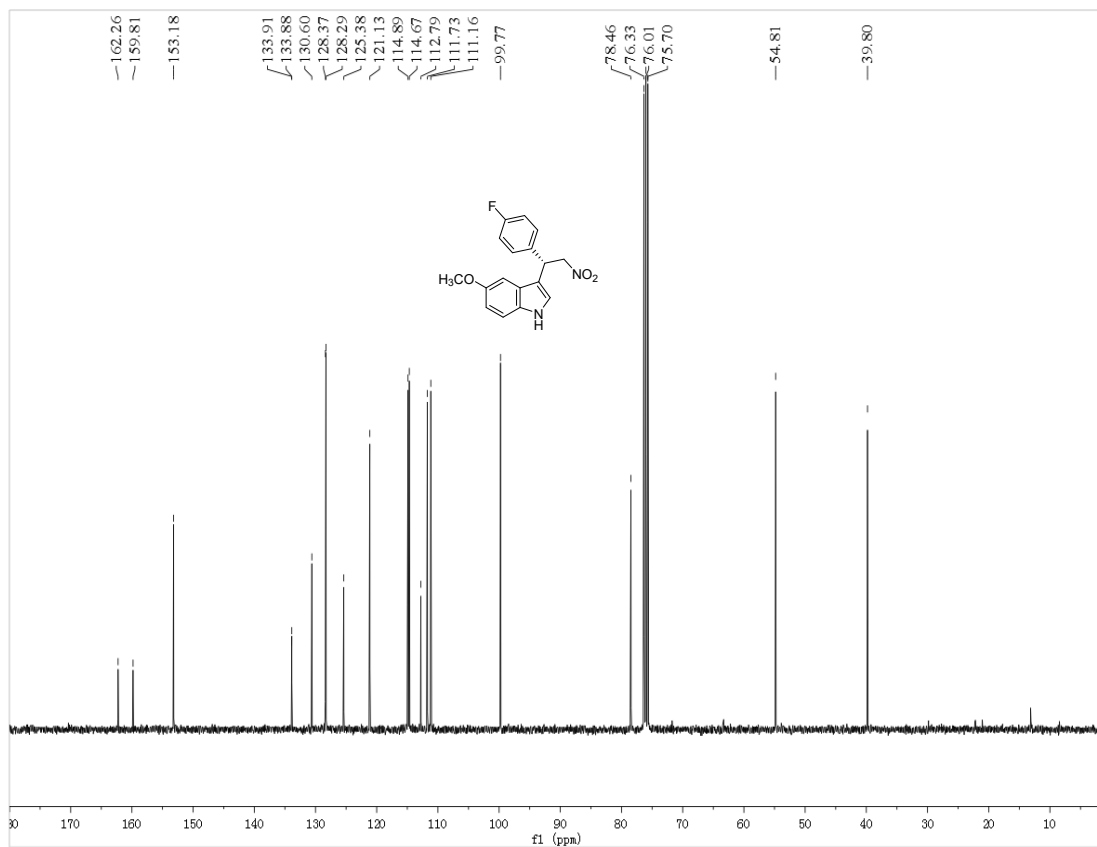

## HPLC of 6q

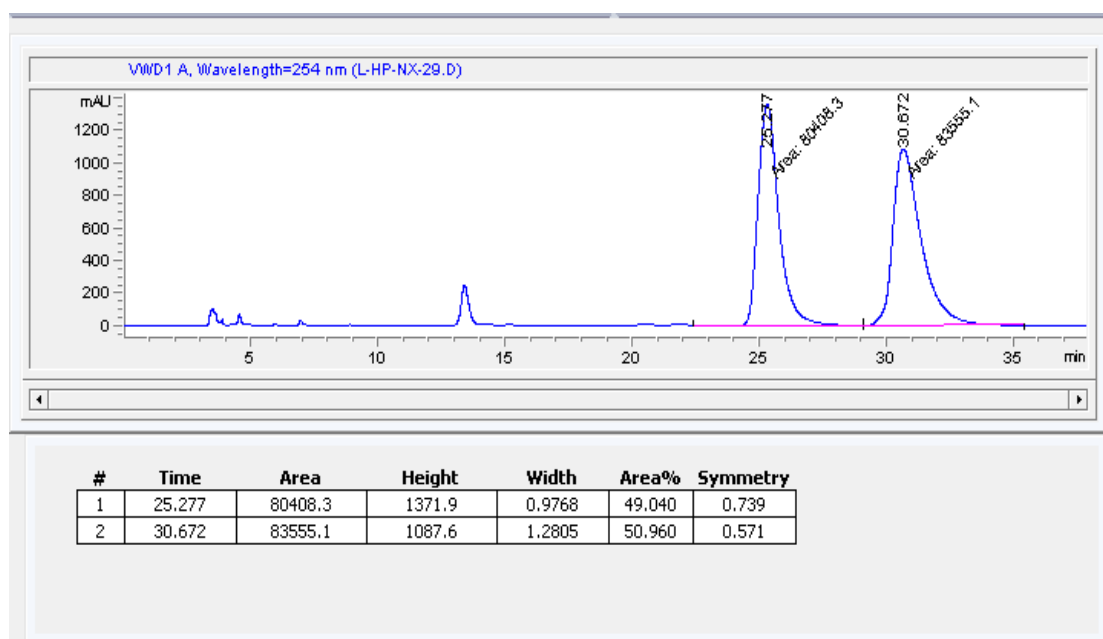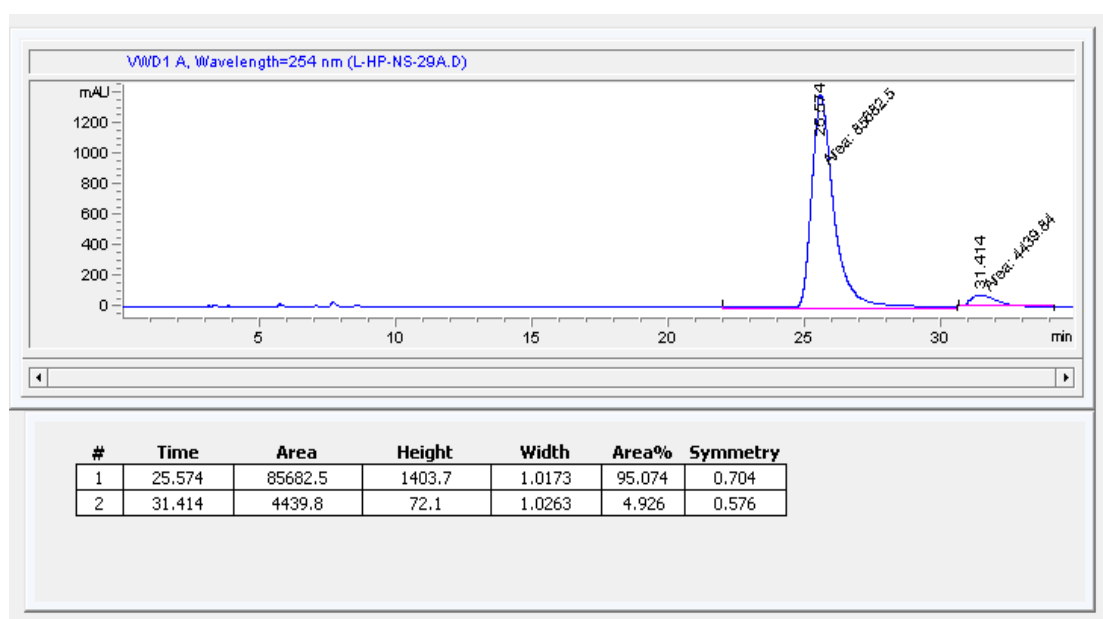

**<sup>1</sup>H and <sup>13</sup>C NMR of 6r**

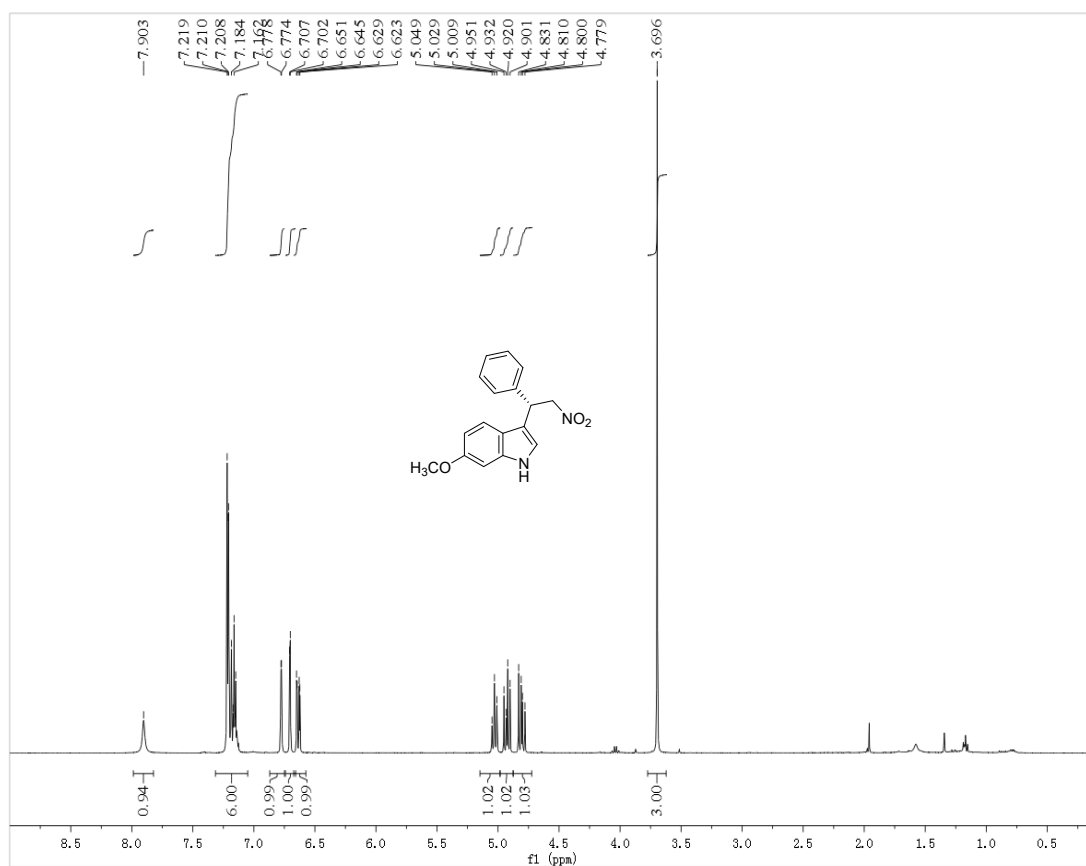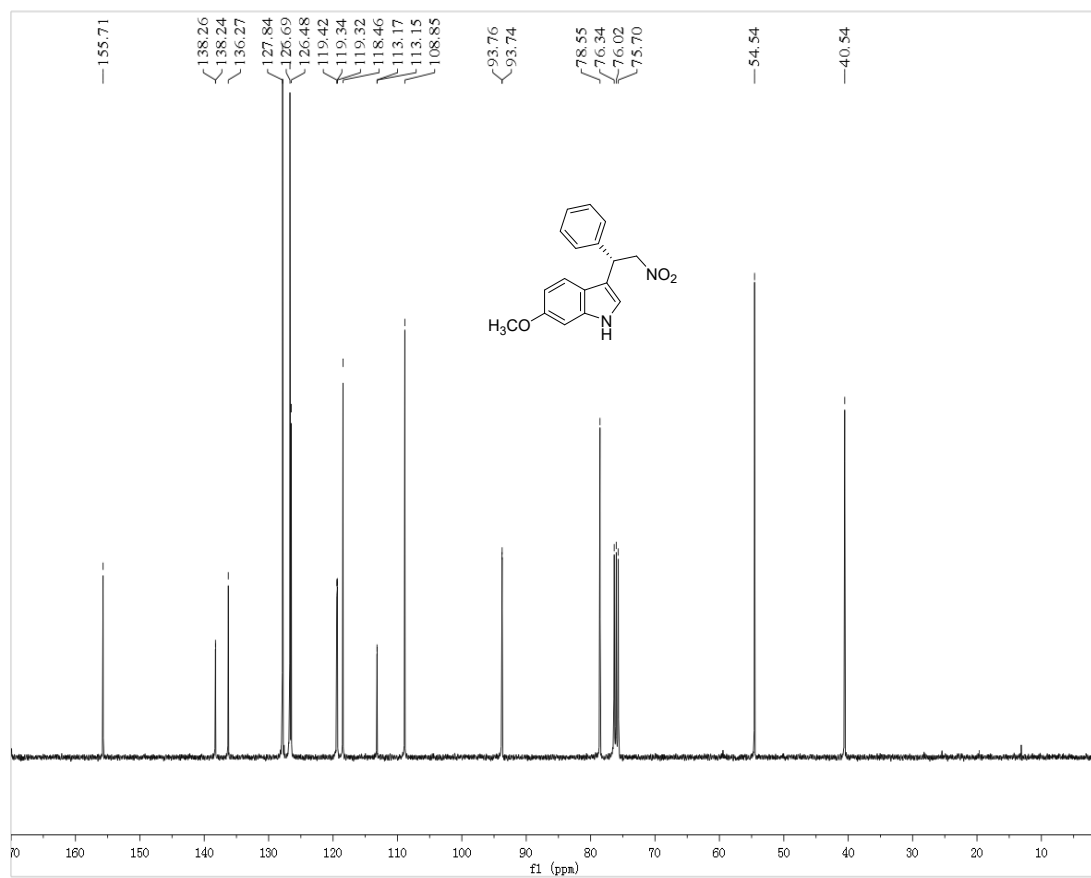

## HPLC of 6r

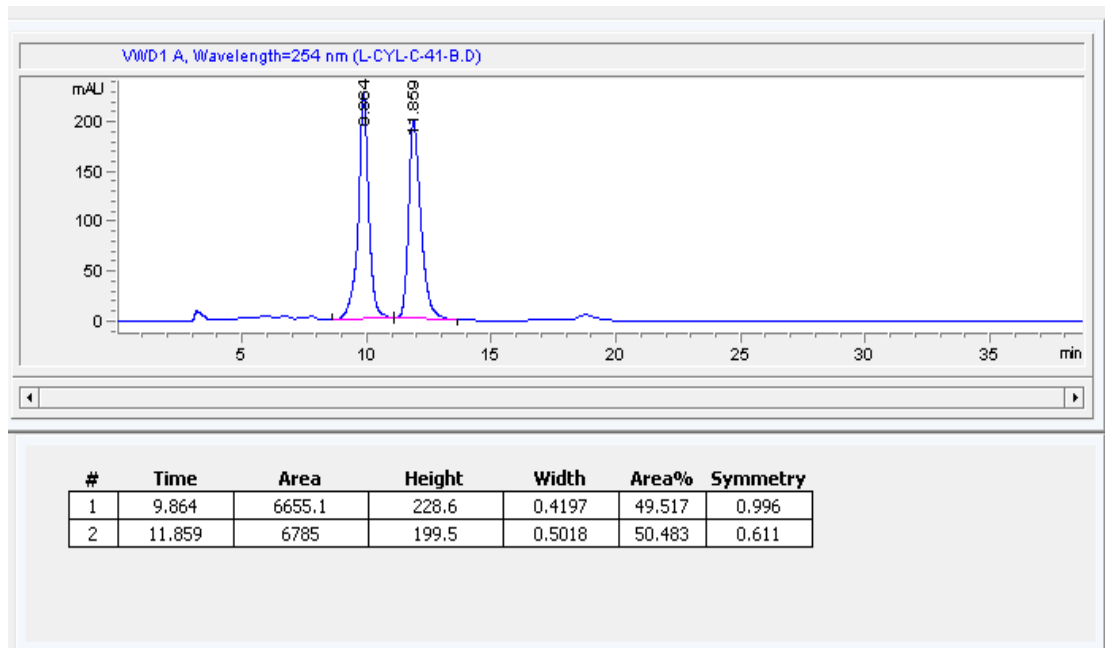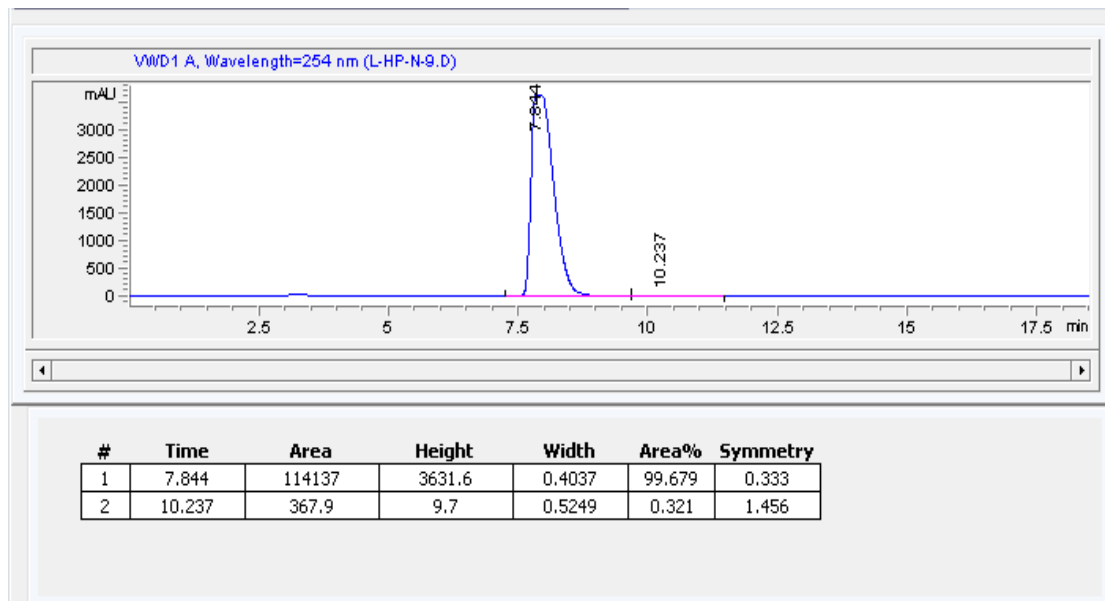

<sup>1</sup>H and <sup>13</sup>C NMR of 6s

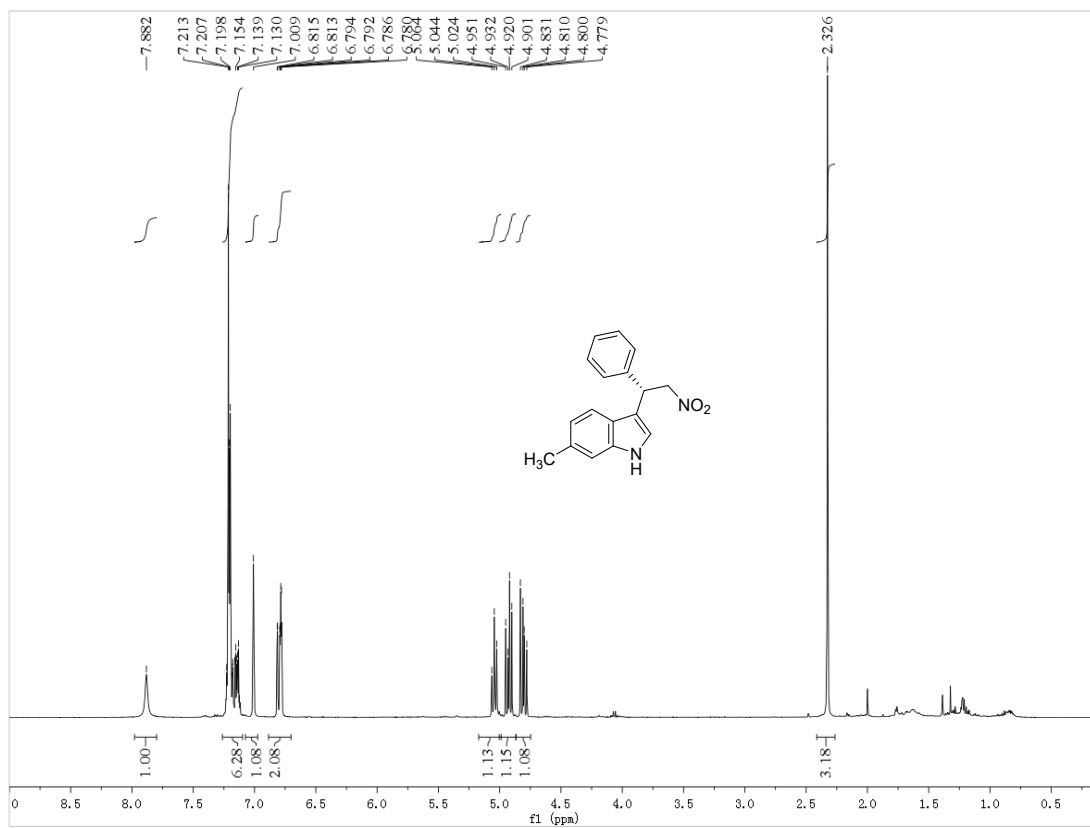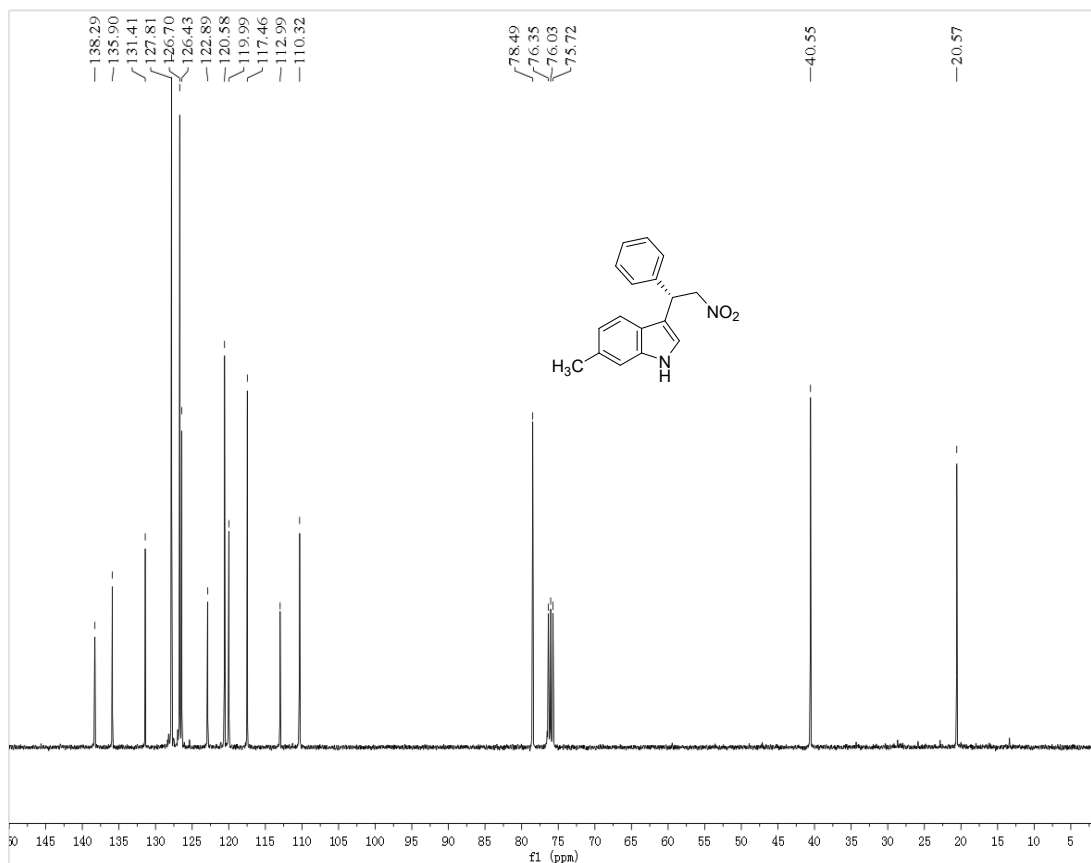

## HPLC of 6s

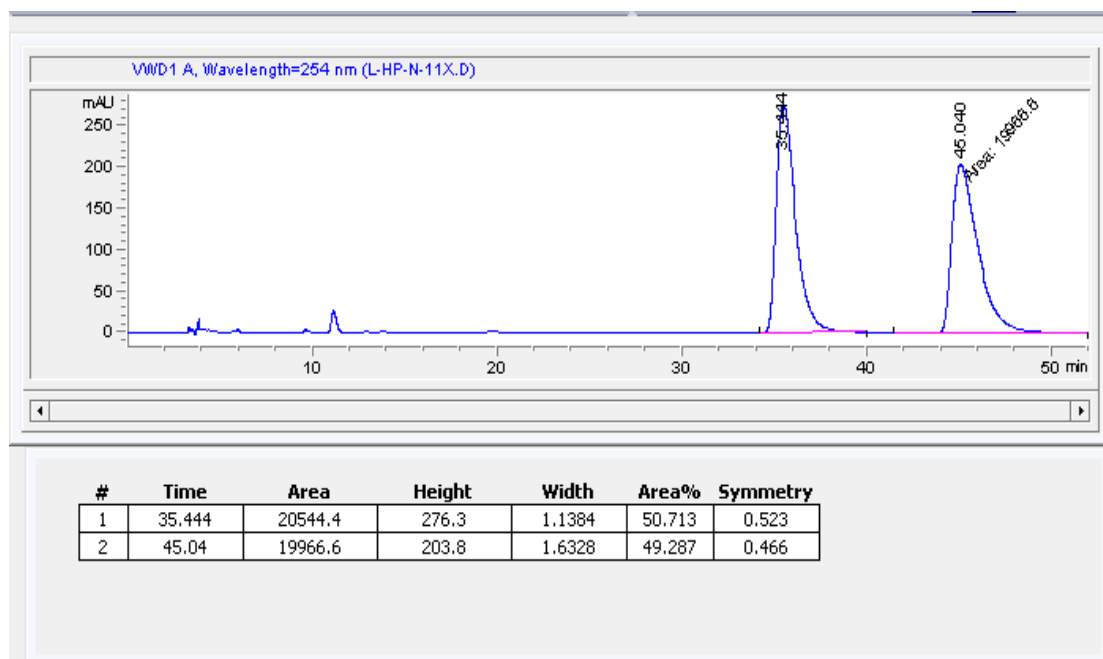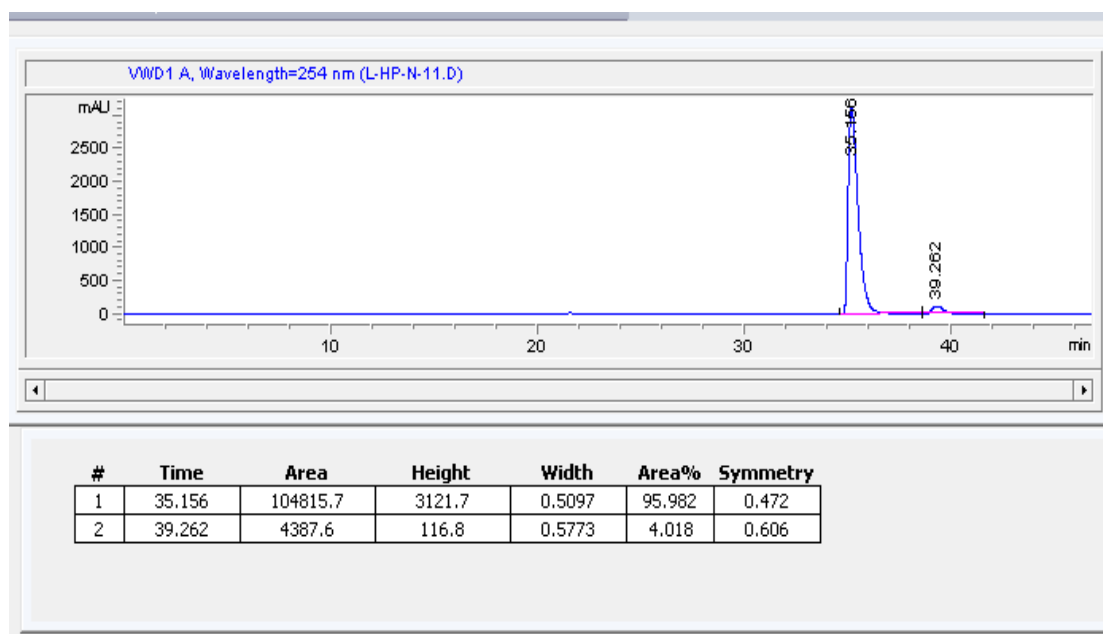



# <sup>1</sup>H and <sup>13</sup>C NMR of 6t

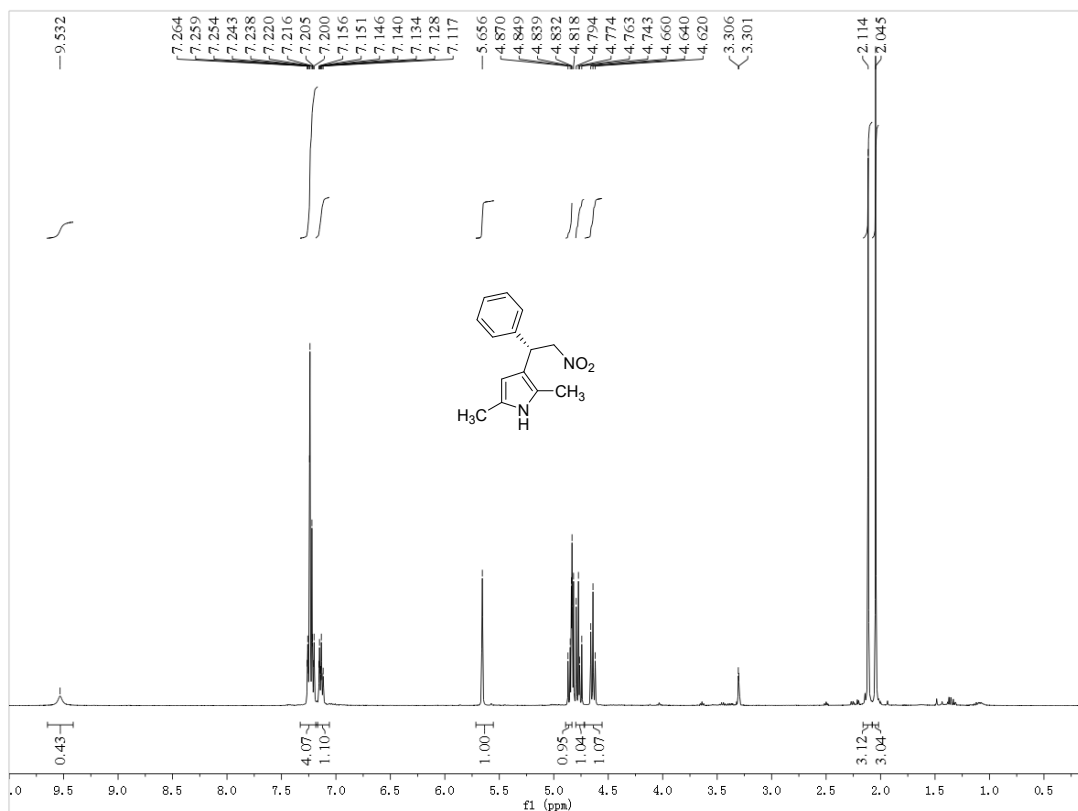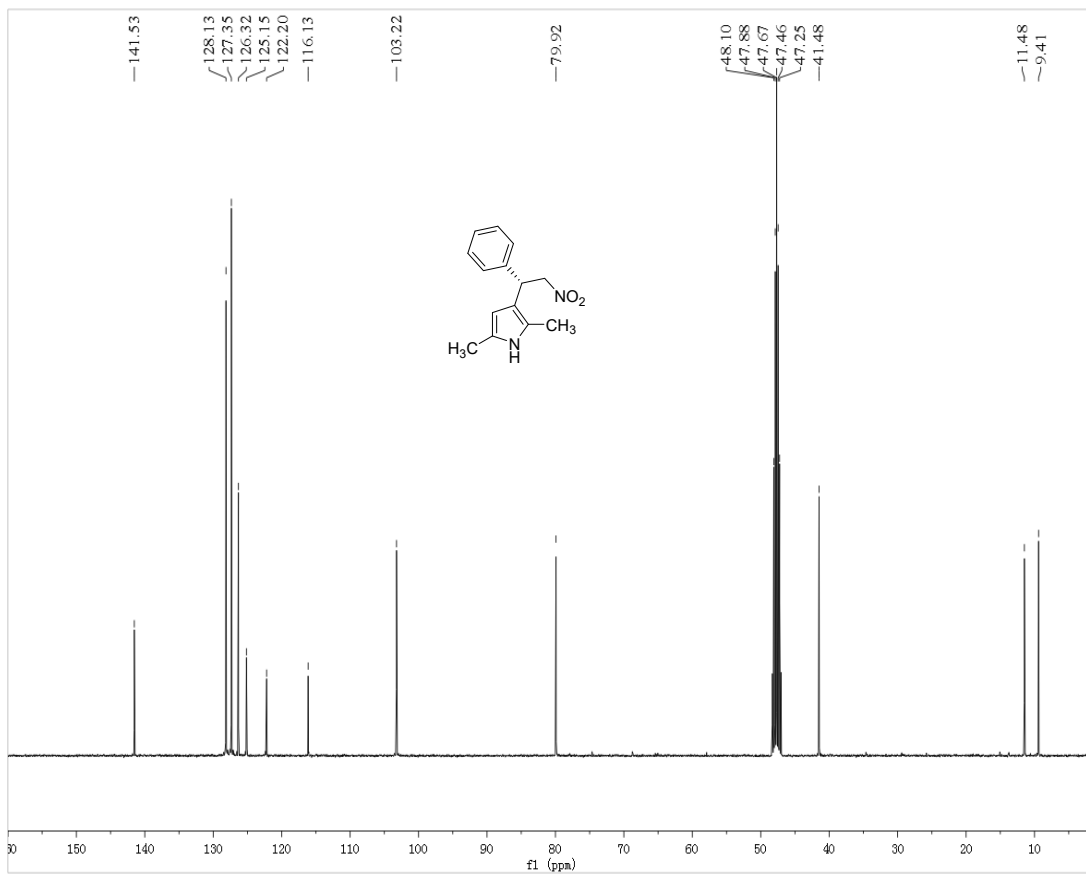

## HPLC of 6t

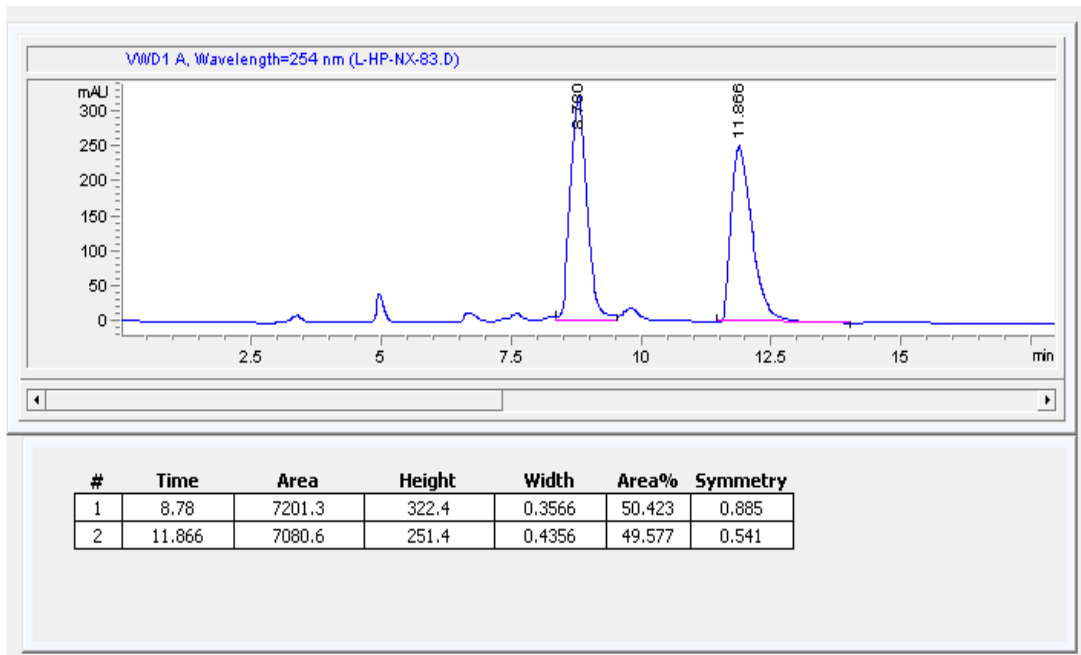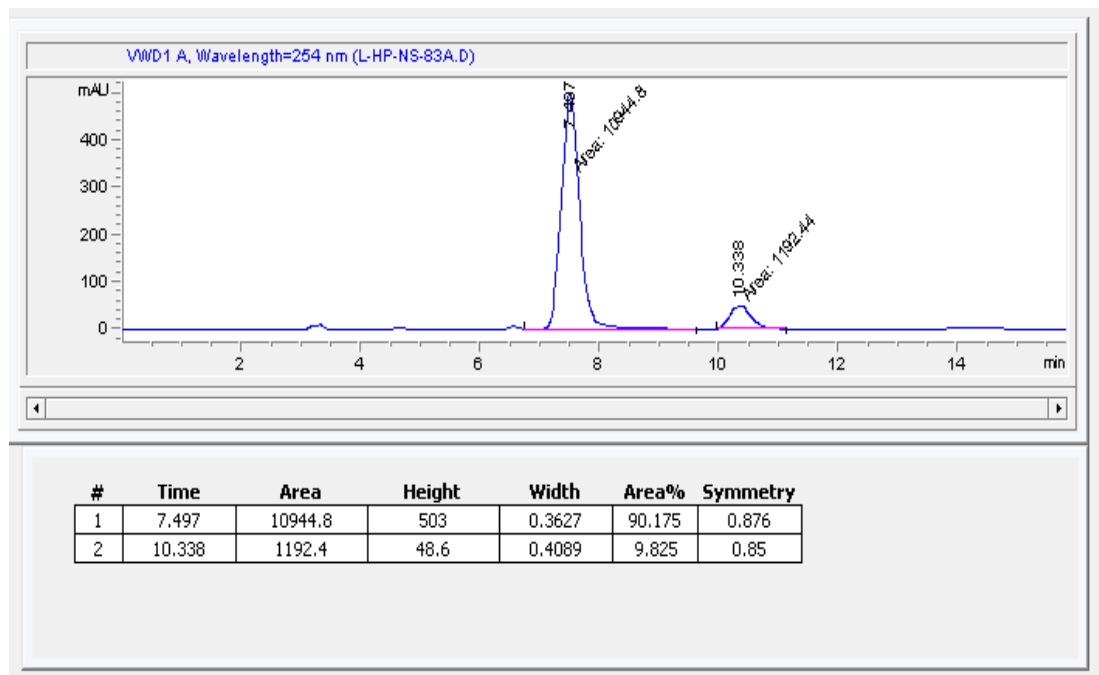

# <sup>1</sup>H and <sup>13</sup>C NMR of 6u

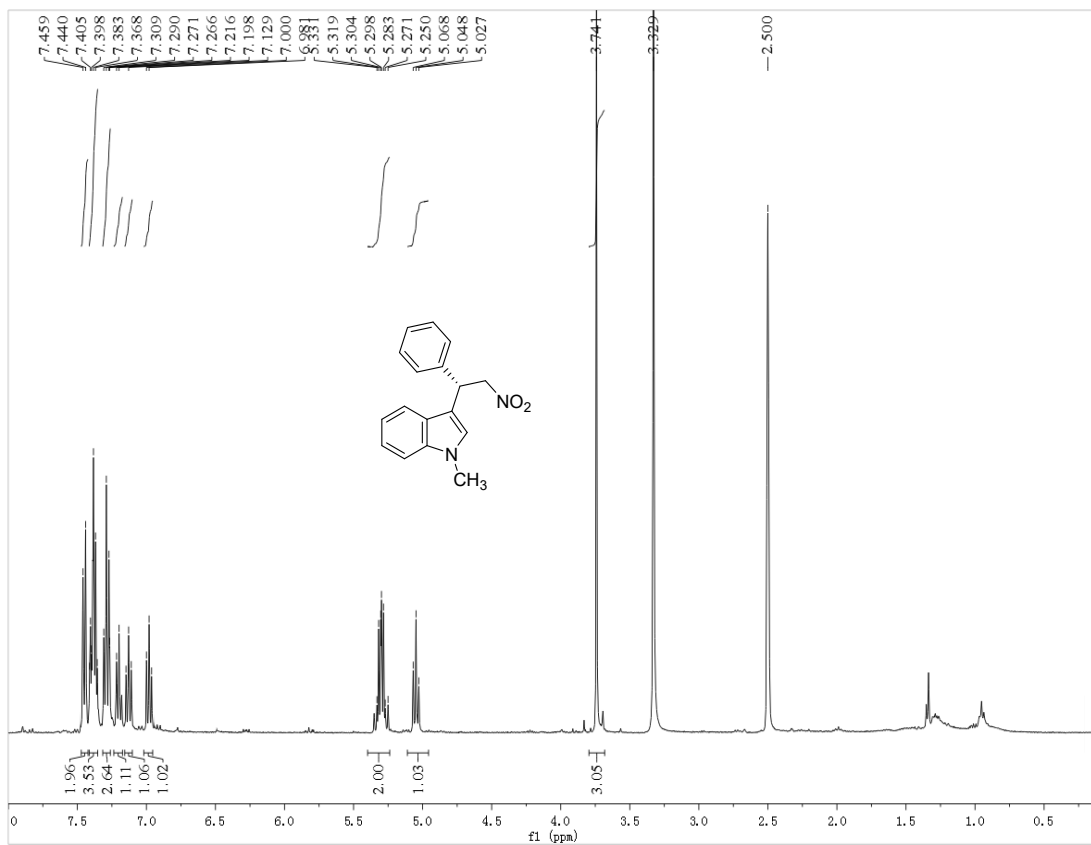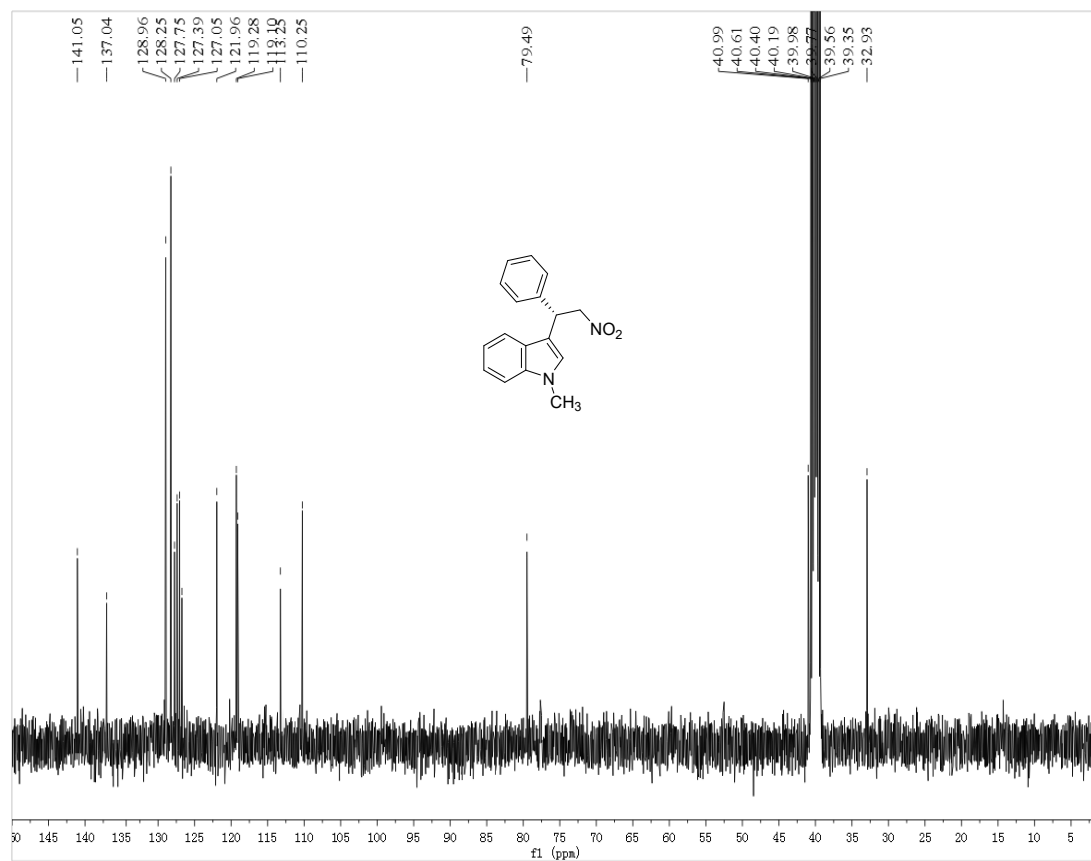

## HPLC of 6u

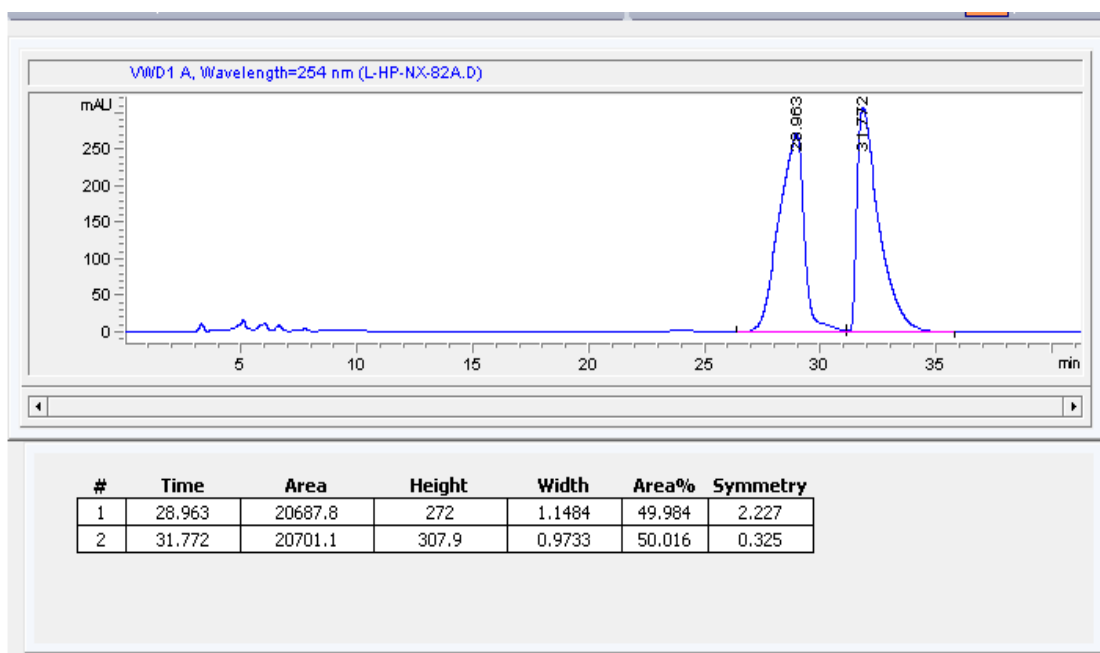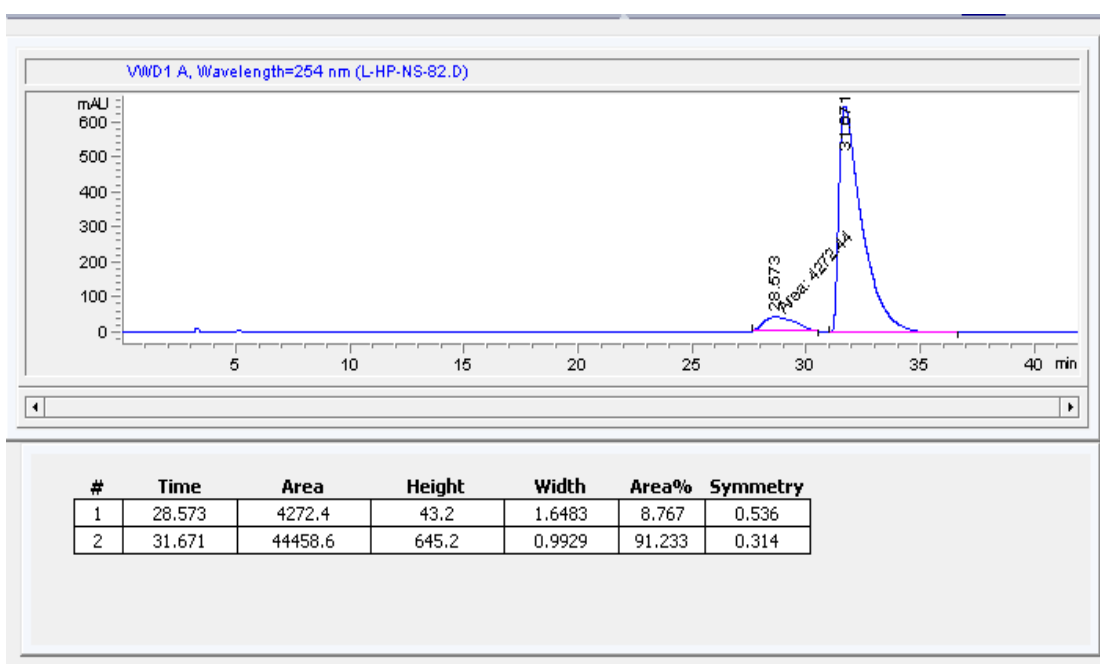

Supplement: d4qo00248b1.pdf [file d4qo00248b1.pdf]
